# Supplementary material for: How does capacity building of health managers work? A realist evaluation study protocol
Source: PubMed Central journal article supplement — BMJ Open. 2012 Mar 30;2(2):e000882. doi: 10.1136/bmjopen-2012-000882 (PMC3330260; doi:10.1136/bmjopen-2012-000882), 2012-03-30
Supplement: bmjopen-2012-000882-s3.pdf [file bmjopen-2012-000882-s3.pdf]

DATA FILE: \ [REDACTED] Phd survey\Survey\_dhm\_20Oct2011.rec  
 File label: SURvey DHM  
 File size: 11 kb  
 Last revision: 20. Oct 2011 4:57 PM  
 Number of fields: 130  
 Number of records: 0  
 Checks applied: Yes (Last revision 20. Oct 2011 6:20 PM)

Fields in data file:

| No. | Name | Variable label                    | Field type | Width | Checks                       | Value labels                                                                                          |
|-----|------|-----------------------------------|------------|-------|------------------------------|-------------------------------------------------------------------------------------------------------|
| 1   | id   | automatic id number               | ID number  | 5     |                              |                                                                                                       |
| 2   | a1   | respondent number                 | Number     | 3     | Must enter<br>Legal: 100-300 |                                                                                                       |
| 3   | a2   | interviewer name                  | Number     | 1     | Must enter<br>Legal: 0-11    | interview<br>1: Pra<br>2: Kur<br>3: Bhee<br>4: Mah<br>5: Other                                        |
| 4   | a3   | date                              | Date (dmy) | 10    | Must enter                   |                                                                                                       |
| 5   | a4   | time taken(in minutes)            | Number     | 2     | Must enter<br>Legal: 0-90    |                                                                                                       |
| 6   | a5   | person doing data entry           | Number     | 1     | Must enter<br>Legal: 0-3     | dataentry<br>1: Srinivas<br>2: Other                                                                  |
| 7   | a6   | data checked                      | Number     | 1     | Must enter<br>Legal: 0-2     | yesno<br>0: Blank<br>1: Yes<br>2: No                                                                  |
| 8   | b1   | The purpose of the NRHM PIP       | Number     | 1     | Must enter<br>Legal: 0-4     |                                                                                                       |
| 9   | b2   | If I were in charge of NRHM       | Number     | 1     | Must enter<br>Legal: 0-5     |                                                                                                       |
| 10  | b3   | At the PHC level                  | Number     | 1     | Must enter<br>Legal: 0-4     |                                                                                                       |
| 11  | b4   | At the taluka level               | Number     | 1     | Must enter<br>Legal: 0-5     |                                                                                                       |
| 12  | b5   | Which statement best summarises   | Number     | 1     | Must enter<br>Legal: 0-6     |                                                                                                       |
| 13  | b6   | For every PIP                     | Number     | 1     | Must enter<br>Legal: 0-5     | likert<br>0: Blank<br>1: Strongly a<br>2: Agree<br>3: Neither a nor d<br>4: Disagree<br>5: Strongly d |
| 14  | b7   | PIPs can be used to bring about   | Number     | 1     | Must enter<br>Legal: 0-5     | likert<br>0: Blank<br>1: Strongly a<br>2: Agree<br>3: Neither a nor d<br>4: Disagree<br>5: Strongly d |
| 15  | b8   | Districts need technical guidance | Number     | 1     | Must enter<br>Legal: 0-5     | likert<br>0: Blank<br>1: Strongly a<br>2: Agree<br>3: Neither a nor d<br>4: Disagree<br>5: Strongly d |
| 16  | b9   | Talukas need                      | Number     | 1     | Must enter                   | likert                                                                                                |

|        |                                      |        |   |                          |                                                                                                       |
|--------|--------------------------------------|--------|---|--------------------------|-------------------------------------------------------------------------------------------------------|
|        | technical guidance                   |        |   | Legal: 0-5               | 0: Blank<br>1: Strongly a<br>2: Agree<br>3: Neither a nor d<br>4: Disagree<br>5: Strongly d           |
| 17 b10 | PHCs need technical guidance         | Number | 1 | Must enter<br>Legal: 0-5 | likert<br>0: Blank<br>1: Strongly a<br>2: Agree<br>3: Neither a nor d<br>4: Disagree<br>5: Strongly d |
| 18 b11 | PIP preparation at taluka level      | Number | 1 | Must enter<br>Legal: 0-5 | likert<br>0: Blank<br>1: Strongly a<br>2: Agree<br>3: Neither a nor d<br>4: Disagree<br>5: Strongly d |
| 19 b12 | I am able to negotiate               | Number | 1 | Must enter<br>Legal: 0-5 | likert<br>0: Blank<br>1: Strongly a<br>2: Agree<br>3: Neither a nor d<br>4: Disagree<br>5: Strongly d |
| 20 b13 | In this year's PIP                   | Number | 1 | Must enter<br>Legal: 0-5 | likert<br>0: Blank<br>1: Strongly a<br>2: Agree<br>3: Neither a nor d<br>4: Disagree<br>5: Strongly d |
| 21 b14 | the activities that we included      | Number | 1 | Must enter<br>Legal: 0-5 | likert<br>0: Blank<br>1: Strongly a<br>2: Agree<br>3: Neither a nor d<br>4: Disagree<br>5: Strongly d |
| 22 b15 | After the NRHM PIP process           | Number | 1 | Must enter<br>Legal: 0-5 | likert<br>0: Blank<br>1: Strongly a<br>2: Agree<br>3: Neither a nor d<br>4: Disagree<br>5: Strongly d |
| 23 b16 | After the submission of PIP          | Number | 1 | Must enter<br>Legal: 0-5 | likert<br>0: Blank<br>1: Strongly a<br>2: Agree<br>3: Neither a nor d<br>4: Disagree<br>5: Strongly d |
| 24 b17 | In my district, most of my colleagus | Number | 1 | Must enter<br>Legal: 0-5 | likert<br>0: Blank<br>1: Strongly a<br>2: Agree<br>3: Neither a nor d<br>4: Disagree<br>5: Strongly d |
| 25 b18 | In my district, most PHCs            | Number | 1 |                          |                                                                                                       |
| 26 b19 | In my facility                       | Number | 1 | Must enter<br>Legal: 0-5 | likert<br>0: Blank<br>1: Strongly a<br>2: Agree<br>3: Neither a nor d<br>4: Disagree<br>5: Strongly d |

|        |                                        |        |   |                          |                                                                                                       |
|--------|----------------------------------------|--------|---|--------------------------|-------------------------------------------------------------------------------------------------------|
| 27 b20 | I am able to discuss                   | Number | 1 | Must enter<br>Legal: 0-5 | likert<br>0: Blank<br>1: Strongly a<br>2: Agree<br>3: Neither a nor d<br>4: Disagree<br>5: Strongly d |
| 28 c1  | it is difficult for me                 | Number | 1 | Must enter<br>Legal: 0-5 | likert<br>0: Blank<br>1: Strongly a<br>2: Agree<br>3: Neither a nor d<br>4: Disagree<br>5: Strongly d |
| 29 c2  | I would not leave my present           | Number | 1 | Must enter<br>Legal: 0-5 | likert<br>0: Blank<br>1: Strongly a<br>2: Agree<br>3: Neither a nor d<br>4: Disagree<br>5: Strongly d |
| 30 c3  | I would be very happy to spend         | Number | 1 | Must enter<br>Legal: 0-5 | likert<br>0: Blank<br>1: Strongly a<br>2: Agree<br>3: Neither a nor d<br>4: Disagree<br>5: Strongly d |
| 31 c4  | I will not leave the organisation      | Number | 1 | Must enter<br>Legal: 0-5 | likert<br>0: Blank<br>1: Strongly a<br>2: Agree<br>3: Neither a nor d<br>4: Disagree<br>5: Strongly d |
| 32 c5  | Even if it were to my advantage        | Number | 1 | Must enter<br>Legal: 0-5 | likert<br>0: Blank<br>1: Strongly a<br>2: Agree<br>3: Neither a nor d<br>4: Disagree<br>5: Strongly d |
| 33 c6  | I really feel as if my organisation    | Number | 1 | Must enter<br>Legal: 0-5 | likert<br>0: Blank<br>1: Strongly a<br>2: Agree<br>3: Neither a nor d<br>4: Disagree<br>5: Strongly d |
| 34 c7  | Right now staying in this organisation | Number | 1 | Must enter<br>Legal: 0-5 | likert<br>0: Blank<br>1: Strongly a<br>2: Agree<br>3: Neither a nor d<br>4: Disagree<br>5: Strongly d |
| 35 c8  | I do not feel a strong sense           | Number | 1 | Must enter<br>Legal: 0-5 | likert<br>0: Blank<br>1: Strongly a<br>2: Agree<br>3: Neither a nor d<br>4: Disagree<br>5: Strongly d |
| 36 c9  | I think that there are very            | Number | 1 | Must enter<br>Legal: 0-5 | likert<br>0: Blank<br>1: Strongly a<br>2: Agree<br>3: Neither a nor d<br>4: Disagree<br>5: Strongly d |
| 37 c10 | I do not feel emotionally              | Number | 1 | Must enter<br>Legal: 0-5 | likert<br>0: Blank                                                                                    |

|        |                            |        |   |                                                          |  |                                                                                                       |
|--------|----------------------------|--------|---|----------------------------------------------------------|--|-------------------------------------------------------------------------------------------------------|
|        |                            |        |   |                                                          |  | 1: Strongly a<br>2: Agree<br>3: Neither a nor d<br>4: Disagree<br>5: Strongly d                       |
| 38 c11 | I would feel guilty if I   | Number | 1 | Must enter<br>Legal: 0-5                                 |  | likert<br>0: Blank<br>1: Strongly a<br>2: Agree<br>3: Neither a nor d<br>4: Disagree<br>5: Strongly d |
| 39 c12 | I do not feel like part    | Number | 1 | Must enter<br>Legal: 0-5                                 |  | likert<br>0: Blank<br>1: Strongly a<br>2: Agree<br>3: Neither a nor d<br>4: Disagree<br>5: Strongly d |
| 40 c13 | This organisation deserves | Number | 1 | Must enter<br>Legal: 0-5                                 |  | likert<br>0: Blank<br>1: Strongly a<br>2: Agree<br>3: Neither a nor d<br>4: Disagree<br>5: Strongly d |
| 41 c14 | I might consider working   | Number | 1 | Must enter<br>Legal: 0-5                                 |  | likert<br>0: Blank<br>1: Strongly a<br>2: Agree<br>3: Neither a nor d<br>4: Disagree<br>5: Strongly d |
| 42 c15 | I would not consider       | Number | 1 | Must enter<br>Legal: 0-5                                 |  | likert<br>0: Blank<br>1: Strongly a<br>2: Agree<br>3: Neither a nor d<br>4: Disagree<br>5: Strongly d |
| 43 c16 | This organisation has      | Number | 1 | Must enter<br>Legal: 0-5                                 |  | likert<br>0: Blank<br>1: Strongly a<br>2: Agree<br>3: Neither a nor d<br>4: Disagree<br>5: Strongly d |
| 44 c17 | Too much of my             | Number | 1 | Must enter<br>Legal: 0-5                                 |  | likert<br>0: Blank<br>1: Strongly a<br>2: Agree<br>3: Neither a nor d<br>4: Disagree<br>5: Strongly d |
| 45 c18 | I owe a great              | Number | 1 | Must enter<br>Legal: 0-5                                 |  | likert<br>0: Blank<br>1: Strongly a<br>2: Agree<br>3: Neither a nor d<br>4: Disagree<br>5: Strongly d |
| 46 d1  | I can solve difficult      | Number | 3 | Must enter<br>Legal: 0,01,10,20,30,40,50,60,70,80,90,100 |  |                                                                                                       |
| 47 d2  | If someone opposes me      | Number | 3 | Must enter<br>Legal: 0,01,10,20,30,40,50,60,70,80,90,100 |  |                                                                                                       |
| 48 d3  | It is easy for me to       | Number | 3 | Must enter<br>Legal: 0,01,10,20,                         |  |                                                                                                       |

|        |                                         |        |    |                                                          |                                                                                                                                                                                                                                                               |
|--------|-----------------------------------------|--------|----|----------------------------------------------------------|---------------------------------------------------------------------------------------------------------------------------------------------------------------------------------------------------------------------------------------------------------------|
|        |                                         |        |    | 30,40,50,60,70,80,90,100                                 |                                                                                                                                                                                                                                                               |
| 49 d4  | I am confident that                     | Number | 3  | Must enter<br>Legal: 0,01,10,20,30,40,50,60,70,80,90,100 |                                                                                                                                                                                                                                                               |
| 50 d5  | Thanks to my strategic                  | Number | 3  | Must enter<br>Legal: 0,01,10,20,30,40,50,60,70,80,90,100 |                                                                                                                                                                                                                                                               |
| 51 d6  | I can solve most                        | Number | 3  | Must enter<br>Legal: 0,01,10,20,30,40,50,60,70,80,90,100 |                                                                                                                                                                                                                                                               |
| 52 d7  | I can remain calm                       | Number | 3  | Must enter<br>Legal: 0,01,10,20,30,40,50,60,70,80,90,100 |                                                                                                                                                                                                                                                               |
| 53 d8  | When I am confronted                    | Number | 3  | Must enter<br>Legal: 0,01,10,20,30,40,50,60,70,80,90,100 |                                                                                                                                                                                                                                                               |
| 54 d9  | If I am in trouble                      | Number | 3  | Must enter<br>Legal: 0,01,10,20,30,40,50,60,70,80,90,100 |                                                                                                                                                                                                                                                               |
| 55 d10 | No matter what                          | Number | 3  | Must enter<br>Legal: 0,01,10,20,30,40,50,60,70,80,90,100 |                                                                                                                                                                                                                                                               |
| 56 e1  | district                                | Number | 1  | Must enter<br>Legal: 0-2                                 |                                                                                                                                                                                                                                                               |
| 57 e2  | taluka                                  | Number | 3  | Must enter<br>Legal: 0-16                                | taluka<br>0: Blank<br>1: Tumkur<br>2: Gubbi<br>3: Tiptur<br>4: Turuvekere<br>5: CNhalli<br>6: Kunigal<br>7: Madhugiri<br>8: Pavagada<br>9: Koratagere<br>10: Sira<br>11: Raichur<br>12: Sindhanur<br>13: Manvi<br>14: Lingsugur<br>15: Devadurga<br>16: Other |
| 58 e3  | primary designation                     | Text   | 34 | Must enter                                               |                                                                                                                                                                                                                                                               |
| 59 e4  | How long have you (in years)            | Number | 2  | Must enter<br>Legal: 0-35                                |                                                                                                                                                                                                                                                               |
| 60 e51 | concepts in public health               | Number | 1  | Must enter<br>Legal: 0,1                                 | checkbox<br>0: Blank or no tick<br>1: Ticked                                                                                                                                                                                                                  |
| 61 e52 | leadership                              | Number | 1  | Must enter<br>Legal: 0,1                                 | checkbox<br>0: Blank or no tick<br>1: Ticked                                                                                                                                                                                                                  |
| 62 e53 | planning                                | Number | 1  | Must enter<br>Legal: 0,1                                 | checkbox<br>0: Blank or no tick<br>1: Ticked                                                                                                                                                                                                                  |
| 63 e54 | human resources planning and motivation | Number | 1  | Must enter<br>Legal: 0,1                                 | checkbox<br>0: Blank or no tick<br>1: Ticked                                                                                                                                                                                                                  |

|    |     |                                |        |   |                           |                                              |
|----|-----|--------------------------------|--------|---|---------------------------|----------------------------------------------|
| 64 | e55 | administrative procedures      | Number | 1 | Must enter<br>Legal: 0,1  | checkbox<br>0: Blank or no tick<br>1: Ticked |
| 65 | e56 | health and hospital management | Number | 1 | Must enter<br>Legal: 0,1  | checkbox<br>0: Blank or no tick<br>1: Ticked |
| 66 | e57 | HMIS                           | Number | 1 | Must enter<br>Legal: 0,1  | checkbox<br>0: Blank or no tick<br>1: Ticked |
| 67 | e58 | health and hospital management | Number | 1 | Must enter<br>Legal: 0,1  | checkbox<br>0: Blank or no tick<br>1: Ticked |
| 68 | e59 | financial and medicolegal      | Number | 1 | Must enter<br>Legal: 0,1  | checkbox<br>0: Blank or no tick<br>1: Ticked |
| 69 | e60 | teamwork                       | Number | 1 | Must enter<br>Legal: 0,1  | checkbox<br>0: Blank or no tick<br>1: Ticked |
| 70 | e61 | emergency obstetric care       | Number | 1 | Must enter<br>Legal: 0,1  | checkbox<br>0: Blank or no tick<br>1: Ticked |
| 71 | e62 | role of PRI                    | Number | 1 | Must enter<br>Legal: 0,1  | checkbox<br>0: Blank or no tick<br>1: Ticked |
| 72 | e63 | nrhm pip                       | Number | 1 | Must enter<br>Legal: 0,1  | checkbox<br>0: Blank or no tick<br>1: Ticked |
| 73 | e64 | supportive supervision         | Number | 1 | Must enter<br>Legal: 0,1  | checkbox<br>0: Blank or no tick<br>1: Ticked |
| 74 | e65 | quality in health care         | Number | 1 | Must enter<br>Legal: 0,1  | checkbox<br>0: Blank or no tick<br>1: Ticked |
| 75 | e66 | other topic not listed         | Number | 1 | Must enter<br>Legal: 0,1  | checkbox<br>0: Blank or no tick<br>1: Ticked |
| 76 | e6  | have you attended the          | Number | 1 | Must enter<br>Legal: 0-3  |                                              |
| 77 | e7  | if yes which components        | Number | 1 | Must enter<br>Legal: 0-4  |                                              |
| 78 | e8  | in the swasthya karnataka      | Number | 1 | Must enter<br>Legal: 0-12 |                                              |
| 79 | e9  | have you been visited          | Number | 1 | Must enter<br>Legal: 0-3  |                                              |
| 80 | e10 | if yes how many times          | Number | 2 | Must enter<br>Legal: 0-50 |                                              |
| 81 | f1  | the content of the classroom   | Number | 1 | Must enter<br>Legal: 0-6  |                                              |
| 82 | f2  | after attending the classes    | Number | 1 | Must enter<br>Legal: 0-6  |                                              |
| 83 | f3  | after the classes, I can       | Number | 1 | Must enter<br>Legal: 0-6  |                                              |
| 84 | f4  | the visits ...skills           | Number | 1 | Must enter<br>Legal: 0-6  |                                              |
| 85 | f5  | the visits ...implement        | Number | 1 | Must enter<br>Legal: 0-6  |                                              |
| 86 | f6  | the visits ...discuss          | Number | 1 | Must enter<br>Legal: 0-6  |                                              |
| 87 | f7  | working on                     | Number | 1 | Must enter                |                                              |

|           |                                         |        |    |            |                                                  |                                                                                                       |
|-----------|-----------------------------------------|--------|----|------------|--------------------------------------------------|-------------------------------------------------------------------------------------------------------|
|           | assignments                             |        |    |            | Legal: 0-6                                       |                                                                                                       |
| 88 f8     | because of the discussion               | Number | 1  | Must enter | Legal: 0-6                                       |                                                                                                       |
| 89 f9     | After the training programme            | Number | 1  | Must enter | Legal: 0-3                                       |                                                                                                       |
| 90 f10a   | reasons given yes or no                 | Number | 1  | Must enter | Legal: 0-2                                       | yesno<br>0: Blank<br>1: Yes<br>2: No                                                                  |
|           |                                         |        |    |            | Jumps: 0>f11,2>f11                               |                                                                                                       |
| 91 f10b   | reason given 1                          | Text   | 78 | Must enter |                                                  |                                                                                                       |
| 92 f10bb  | reason given 1 continued                | Text   | 78 |            |                                                  |                                                                                                       |
| 93 f10c   | reason given 2                          | Text   | 78 | Must enter |                                                  |                                                                                                       |
| 94 f10cc  | reason given 2                          | Text   | 78 |            |                                                  |                                                                                                       |
| 95 f11    | if you answered no                      | Number | 1  | Must enter | Legal: 0-7                                       |                                                                                                       |
|           |                                         |        |    |            | Jumps: 0>f12,1>f12,2>f12,3>f12,4>f12,5>f12,7>f12 |                                                                                                       |
| 96 f11a   | Other Please specify in the space below | Text   | 78 | Must enter |                                                  |                                                                                                       |
| 97 f11b   | Please specify                          | Text   | 78 |            |                                                  |                                                                                                       |
| 98 f12    | after the training programme            | Number | 1  | Must enter | Legal: 0-3                                       |                                                                                                       |
| 99 f13a   | reasons given yes or no                 | Number | 1  | Must enter | Legal: 0-2                                       | yesno<br>0: Blank<br>1: Yes<br>2: No                                                                  |
|           |                                         |        |    |            | Jumps: 0>f14,2>f14                               |                                                                                                       |
| 100 f13b  | reason given 1                          | Text   | 78 | Must enter |                                                  |                                                                                                       |
| 101 f13bb | reason given 1 continued                | Text   | 78 |            |                                                  |                                                                                                       |
| 102 f13c  | reason given 2                          | Text   | 78 | Must enter |                                                  |                                                                                                       |
| 103 f13cc | reason given 2                          | Text   | 78 |            |                                                  |                                                                                                       |
| 104 f14   | if you answered no                      | Number | 1  | Must enter | Legal: 0-7                                       |                                                                                                       |
|           |                                         |        |    |            | Jumps: 0>g1,1>g1,2>g1,3>g1,4>g1,5>g1,7>g1        |                                                                                                       |
| 105 f14a  | Other Please specify in the space below | Text   | 78 | Must enter |                                                  |                                                                                                       |
| 106 f14b  | Please specify                          | Text   | 78 |            |                                                  |                                                                                                       |
| 107 g1    | my supervisor helps                     | Number | 1  | Must enter | Legal: 0-5                                       | likert<br>0: Blank<br>1: Strongly a<br>2: Agree<br>3: Neither a nor d<br>4: Disagree<br>5: Strongly d |
| 108 g2    | my supervisor encourages                | Number | 1  | Must enter | Legal: 0-5                                       | likert<br>0: Blank<br>1: Strongly a<br>2: Agree<br>3: Neither a nor d<br>4: Disagree<br>5: Strongly d |
| 109 g3    | my supervisor                           | Number | 1  | Must enter |                                                  | likert                                                                                                |

|         |                                      |        |   |                          |                                                                                                       |
|---------|--------------------------------------|--------|---|--------------------------|-------------------------------------------------------------------------------------------------------|
|         | leaves                               |        |   | Legal: 0-5               | 0: Blank<br>1: Strongly a<br>2: Agree<br>3: Neither a nor d<br>4: Disagree<br>5: Strongly d           |
| 110 g4  | my supervisor encourages me to learn | Number | 1 | Must enter<br>Legal: 0-5 | likert<br>0: Blank<br>1: Strongly a<br>2: Agree<br>3: Neither a nor d<br>4: Disagree<br>5: Strongly d |
| 111 g5  | my supervisor does not explain       | Number | 1 | Must enter<br>Legal: 0-5 | likert<br>0: Blank<br>1: Strongly a<br>2: Agree<br>3: Neither a nor d<br>4: Disagree<br>5: Strongly d |
| 112 g6  | my supervisor knows my reaction      | Number | 1 | Must enter<br>Legal: 0-5 | likert<br>0: Blank<br>1: Strongly a<br>2: Agree<br>3: Neither a nor d<br>4: Disagree<br>5: Strongly d |
| 113 g7  | my supervisor helps me take          | Number | 1 | Must enter<br>Legal: 0-5 | likert<br>0: Blank<br>1: Strongly a<br>2: Agree<br>3: Neither a nor d<br>4: Disagree<br>5: Strongly d |
| 114 g8  | my supervisor does not give          | Number | 1 | Must enter<br>Legal: 0-5 | likert<br>0: Blank<br>1: Strongly a<br>2: Agree<br>3: Neither a nor d<br>4: Disagree<br>5: Strongly d |
| 115 g9  | my supervisor trusts                 | Number | 1 | Must enter<br>Legal: 0-5 | likert<br>0: Blank<br>1: Strongly a<br>2: Agree<br>3: Neither a nor d<br>4: Disagree<br>5: Strongly d |
| 116 g10 | my supervisor recognises             | Number | 1 | Must enter<br>Legal: 0-5 | likert<br>0: Blank<br>1: Strongly a<br>2: Agree<br>3: Neither a nor d<br>4: Disagree<br>5: Strongly d |
| 117 g11 | my supervisor is always              | Number | 1 | Must enter<br>Legal: 0-5 | likert<br>0: Blank<br>1: Strongly a<br>2: Agree<br>3: Neither a nor d<br>4: Disagree<br>5: Strongly d |
| 118 g12 | my supervisor decides                | Number | 1 | Must enter<br>Legal: 0-5 | likert<br>0: Blank<br>1: Strongly a<br>2: Agree<br>3: Neither a nor d<br>4: Disagree<br>5: Strongly d |
| 119 g13 | my supervisor finds fault            | Number | 1 | Must enter<br>Legal: 0-5 | likert<br>0: Blank<br>1: Strongly a                                                                   |



|         |                               |            |    |                                |                                                                                                                                                                             |
|---------|-------------------------------|------------|----|--------------------------------|-----------------------------------------------------------------------------------------------------------------------------------------------------------------------------|
| 120 g14 | my supervisor<br>and I        | Number     | 1  | Must enter<br>Legal: 0-5       | 2: Agree<br>3: Neither a nor d<br>4: Disagree<br>5: Strongly d<br><br>likert<br>0: Blank<br>1: Strongly a<br>2: Agree<br>3: Neither a nor d<br>4: Disagree<br>5: Strongly d |
| 121 h1  | sex                           | Number     | 1  | Must enter<br>Legal: 0-2       | sex<br>1: Male<br>2: Female<br>9: Unknown                                                                                                                                   |
| 122 h2  | dob                           | Date (dmy) | 10 | Must enter                     |                                                                                                                                                                             |
| 123 h3  | in what type of<br>locality   | Number     | 1  | Must enter<br>Legal: 0-6       |                                                                                                                                                                             |
| 124 h4  | educational<br>qualifications | Number     | 1  | Must enter<br>Legal: 0-6       |                                                                                                                                                                             |
| 125 h5  | in case of mbbs               | Number     | 1  | Must enter<br>Legal: 0-2       |                                                                                                                                                                             |
| 126 h6  | year of joining               | Number     | 4  | Must enter<br>Legal: 1950-2011 |                                                                                                                                                                             |
| 127 h7  | how many years                | Number     | 2  | Must enter<br>Legal: 0-35      |                                                                                                                                                                             |
| 128 h8  | type of<br>employment         | Number     | 1  | Must enter<br>Legal: 0-2       |                                                                                                                                                                             |
| 129 h9  | if holding any<br>additional  | Text       | 49 | Must enter                     |                                                                                                                                                                             |
| 130 h10 | type of<br>appointment        | Number     | 1  | Must enter<br>Legal: 0-2       |                                                                                                                                                                             |

---
