# Supplementary material for: How does capacity building of health managers work? A realist evaluation study protocol
Source: PubMed Central journal article supplement — BMJ Open. 2012 Mar 30;2(2):e000882. doi: 10.1136/bmjopen-2012-000882 (PMC3330260; doi:10.1136/bmjopen-2012-000882), 2012-03-30
Supplement: bmjopen-2012-000882-s4.pdf [file bmjopen-2012-000882-s4.pdf]

(In Kannada)

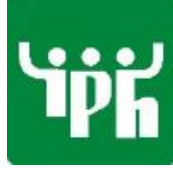

## Institute of Public Health

#250, Masters Cottage, 2<sup>nd</sup> C Main, 2<sup>nd</sup> C Cross, Girinagar I Phase, Bangalore – 560 045

[www.iphindia.org](http://www.iphindia.org) Phone: +91

### ಮಾಹಿತಿ ಚೀಟಿ

ಹಿನ್ನೆಲೆ : ಇನ್ಸ್ಟಿಟ್ಯೂಟ್ ಆಫ್ ಪಬ್ಲಿಕ್ ಹೆಲ್ತ್, ಬೆಂಗಳೂರು ಒಂದು ಸಮುದಾಯ ಆರೋಗ್ಯದ ಬಗ್ಗೆ ತರಬೇತಿ, ಸಂಶೋಧನೆ ಹಾಗೂ ಸಮಾಲೋಚನೆಯಲ್ಲಿ ತೊಡಗಿರುವ ಸಂಸ್ಥೆ. ಈ ಸಂಸ್ಥೆ ತುಮಕೂರಿನಲ್ಲಿ ಜಿಲ್ಲಾ ಹಾಗೂ ತಾಲೂಕು ಆರೋಗ್ಯ ಸಂಸ್ಥೆಗಳಲ್ಲಿ ಸೇವೆ ಸಲ್ಲಿಸುತ್ತಿರುವ ಸಿಬ್ಬಂದಿಗೆ ತರಬೇತಿ ನೀಡುತ್ತಿದೆ.

ಸಂಶೋಧನೆ : ನಮ್ಮ ಸಂಸ್ಥೆಯು ನಿಮ್ಮ ಜಿಲ್ಲೆಯಲ್ಲಿ ನಕಾಶೆ ಮಾಡುವುದರ ಬಗ್ಗೆ, ಅದರಲ್ಲೂ ರಾಷ್ಟ್ರೀಯ ಗ್ರಾಮೀಣ ಆರೋಗ್ಯ ಅಭಿಯಾನದ ಅಡಿಯಲ್ಲಿ ೨೦೧೦ ವರ್ಷದ ಪಿ ಐ ಪಿ ಯಾವ ರೀತಿ ಮಾಡಲಾಯಿತು ಎಂಬುದರ ಬಗ್ಗೆ ತಿಳಿಯಲು ಒಂದು ಸಂಶೋಧನೆ ನಡೆಸುತ್ತಿದೆ. ಈ ಸಂಶೋಧನೆ ಪಿ ಐ ಪಿ ಮಾಡುವುದರಲ್ಲಿ ನಿಮ್ಮಲ್ಲಿ ಯಾವ ರೀತಿ ತೊಂದರೆ ಹಾಗೂ ಅಡಚಣೆಗಳು ಬರುತ್ತವೆ ಎಂದು ತಿಳಿಯಲು ಮಾಡುತ್ತಿದ್ದೇವೆ. ಸಂಶೋಧನೆಯಲ್ಲಿ ತಪ್ಪು ಕಂಡುಹಿಡಿಯುವುದಾಗಲಿ, ಅಥವಾ ಕೊರತೆಗಳು ಕಂಡುಹಿಡಿಯುವುದಕ್ಕಾಗಲಿ ಮಾಡುತ್ತಿಲ್ಲ. ನಾವು ಈ ಕುರಿತು ಜಿಲ್ಲಾ ತಾಲೂಕು ಪಿ ಎಚ್ ಸಿ ಹಾಗೂ ಹಳ್ಳಿಗಳ ಮಟ್ಟದಲ್ಲಿ ಆರೋಗ್ಯ ಸೇವೆಗಳ ಸಿಬ್ಬಂದಿಯೊಂದಿಗೆ ಸಂದರ್ಶನ ನಡೆಸುತ್ತೇವೆ. ಜೊತೆಗೆ, ಜಿಲ್ಲಾ ಮಟ್ಟದಲ್ಲಿ ಪಿ ಐ ಪಿ ಯಲ್ಲಿ ತೊಡಗಿದ್ದ ಅಧಿಕಾರಿಗಳೊಂದಿಗೂ ಸಂದರ್ಶನ ಮಾಡುತ್ತೇವೆ. ನಂತರ, ರಾಷ್ಟ್ರ ಮಟ್ಟದಲ್ಲಿ ಹಾಗೂ ಕೇಂದ್ರ ಸರ್ಕಾರದ ಮಟ್ಟದಲ್ಲಿ ಏನ್.ಆರ್.ಎಚ್.ಎಂ ಅಧಿಕಾರಿಗಳೊಂದಿಗೂ ಸಂದರ್ಶಿಸುತ್ತೇವೆ.

ಏಕೆ : ಪಿ.ಐ.ಪಿ ಮಾಡುವುದರಲ್ಲಿ ಹಲವಾರು ತೊಂದರೆಗಳು ಮತ್ತು ಅಡಚಣೆಗಳು ಕಂಡುಬರುತ್ತವೆ. ಆದರೆ ಪ್ರತಿ ವರ್ಷ ಪಿ.ಐ.ಪಿ ಇಡೀ ದೇಶದಲ್ಲಿ ಒಂದೇ ರೀತಿಯಲ್ಲಿ ಮಾಡಲಾಗುತ್ತದೆ. ಈ ಸಂಶೋಧನೆಯ ಮುಖಾಂತರ ನಾವು ಜಿಲ್ಲಾ ತಾಲೂಕು ಹಾಗೂ ಕೆಳ ಮಟ್ಟದಲ್ಲಿ ಆಗುವ ತೊಂದರೆಗಳನ್ನು ಅರಿತು, ಇವನ್ನು ನಿವಾರಿಸುವುದಕ್ಕೆ ಯಾವ ಕ್ರಮ ಕೈಗೊಳ್ಳಬೇಕೆಂದು ಮೇಲಿನ ಅಧಿಕಾರಿಗಳ ಮುಂದೆ ಇಡುತ್ತೇವೆ.

ಅನಾಮಧೇಯತೆ ಹಾಗೂ ಗೌಪ್ಯತೆ : ಸಂದರ್ಶನದಲ್ಲಿ ವ್ಯಕ್ತಿ ಪಡಿಸಿರುವ ಎಲ್ಲಾ ಅಭಿಪ್ರಾಯಗಳ ಗೌಪ್ಯತೆ ಕಾಪಾಡಲಾಗುವುದು. ಹಾಗೂ ಎಲ್ಲಾ ಅಭಿಪ್ರಾಯಗಳು ಅನಾಮಧೇಯವಾಗಿ ಅಧ್ಯಯನಿಸಲಾಗುವುದು. ಮೊದಲೇ ತಿಳಿಸಿರುವಂತೆ ಈ ಸಂದರ್ಶನ ಪಿ.ಐ.ಪಿ ಯಲ್ಲಿ ಆಗುವ ಅಡಚಣೆಗಳು ಹಾಗೂ ತೊಂದರೆಗಳನ್ನು ಅರ್ಥ ಮಾಡಿಕೊಂಡು ನಿವಾರಿಸಲು ಮಾಡಲಾಗುತ್ತಿದೆ; ತಪ್ಪು ಕಂಡುಹಿಡಿಯುವುದಕ್ಕಲ್ಲ. ನಿಮ್ಮ ಅಭಿಪ್ರಾಯಗಳನ್ನು ನಿಮ್ಮ ಹೆಸರಿನಿಂದ ಯಾವುದೇ ರೀತಿಯಲ್ಲಿ ಗುರುತಿಸುವಂತೆ ಹೊರಪಡಿಸಲಾಗುವುದಿಲ್ಲ.

ಧ್ವನಿ ಮುದ್ರಣ: ನಿಮ್ಮ ಉತ್ತರ ಹಾಗೂ ಅಭಿಪ್ರಾಯಗಳನ್ನು ಧ್ವನಿ ಮುದ್ರಣ ಯಂತ್ರದ ಮೂಲಕ ಉಲ್ಲೇಖಿಸಲಾಗುವುದು. ಈ ರೀತಿ ತೆಗೆದುಕೊಂಡಿರುವ ಧ್ವನಿ ಮುದ್ರಣವನ್ನು ಅಧ್ಯಯನದ ನಂತರ ಅಳಿಸಲಾಗುವುದು.

ಪರಿಣಾಮ: ಈ ಅಧ್ಯಯನದ ಪರಿಣಾಮವನ್ನು ಮೇಲಿನ ಅಧಿಕಾರಿಗಳಿಗೆ ಜಿಲ್ಲಾ ತಾಲೂಕು ಹಾಗೂ ಹಳ್ಳಿಗಳ ಮಟ್ಟದಲ್ಲಿ ಪಿ.ಐ.ಪಿ ಮಾಡುವುದರಲ್ಲಿ ಯಾವ ರೀತಿಯ ತೊಂದರೆಗಳು ಹಾಗೂ ಅಡಚಣೆಗಳು ಉಂಟಾಗುತ್ತವೆ ಎಂದು ಮತ್ತು ಯಾವ ರೀತಿಯ ಬದಲಾವಣೆಗಳನ್ನು ತರಬೇಕು ಎಂಬುದರ ಬಗ್ಗೆ ತಿಳಿಸಲು ಉಪಯೋಗಿಸಲಾಗುವುದು. ಅದರೊಂದಿಗೆ ಜಿಲ್ಲಾ ಮಟ್ಟದ ಅಧಿಕಾರಿಗಳ ತರಬೇತಿಯಲ್ಲೂ ಉಪಯೋಗಿಸಲಾಗುವುದು. ಪರಿಣಾಮಗಳ ಪಟ್ಟಿನೋಟವನ್ನು ನಿಮಗೆ ಕೊಡಲಾಗುವುದು. ಹೆಚ್ಚು ಮಾಹಿತಿಗಾಗಿ, ಇವರನ್ನು ಸಂಪರ್ಕಿಸಿ: ಡಾ|| ಪ್ರಶಾಂತ್ ಏನ್.ಎಸ್. ಪಿ.ಎಚ್.ಡಿ ವಿದ್ಯಾರ್ಥಿ ಇನ್ಸ್ಟಿಟ್ಯೂಟ್ ಆಫ್ ಪಬ್ಲಿಕ್ ಹೆಲ್ತ್, ಬೆಂಗಳೂರು - ೫೬೦೦೪೫. ದೂ: ೯೯೪೯೯೫ ೯೯೫೬೬. ಈ ಮೈಲೆ:

ನಾನು ಮೇಲಿರುವ ವಿಚಾರವನ್ನು ಓದಿ ತಿಳಿದು, ಈ ಸಂಶೋಧನೆಗೆ ಸಂದರ್ಶನ ನೀಡಲು ಒಪ್ಪಿದ್ದೇನೆ. ನಾನು ಹೇಳುವ ಮಾತುಗಳ ಗೌಪ್ಯತೆಯನ್ನು ಕಾಪಾಡಲಾಗುತ್ತದೆಂದು ತಿಳಿಸಲಾಗಿದೆ. ನನ್ನ ಮಾತುಗಳ ಧ್ವನಿಮುದ್ರಣಕ್ಕೆ ಒಪ್ಪಿದ್ದೇನೆ. ಹೆಸರು/ಇಲ್ಲ

ಸಹಿ:  
ದಿನಾಂಕ:
