# Supplementary material for: How does capacity building of health managers work? A realist evaluation study protocol
Source: PubMed Central journal article supplement — BMJ Open. 2012 Mar 30;2(2):e000882. doi: 10.1136/bmjopen-2012-000882 (PMC3330260; doi:10.1136/bmjopen-2012-000882), 2012-03-30
Supplement: bmjopen-2012-000882-s5.pdf [file bmjopen-2012-000882-s5.pdf]

(In English)

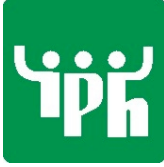

## Institute of Public Health

#250, Masters Cottage, 2<sup>nd</sup> C Main, 2<sup>nd</sup> C Cross, Girinagar I Phase, Bangalore – 560 045  
[www.iphindia.org](http://www.iphindia.org) Phone: +91 [REDACTED]

### Information sheet

**Background:** Institute of Public Health, Bangalore is a non-profit public health institute in Bangalore involved in training, research, consultancy and advocacy. The Institute has recently begun a training programme for the district and taluka health team in Tumkur.

**About the study:** The Institute is undertaking a study in your district to understand the process of planning, specifically the NRHM Programme Implementation Plan for 2010. The study will involve interviews and focus group discussions with people in the health department at district, taluka, PHC and village level. The study will also involve interviews with non-health personnel in the district who have been involved in making the NRHM PIP. In addition, policy makers within the state as well as national level will be interviewed.

**Why the study?** The study is being undertaken to understand the operational problems that happen in implementing the process of NRHM PIP as per the guidelines. We also hope to understand the problems that people face in the field and inform policy makers about it.

**Anonymity and confidentiality** of all views and opinions expressed during the interviews is guaranteed. The aim of the study is not to find fault with the process in your district, but to understand and document issues and problems with the process of PIP preparation itself, and on trying to find out how this can be improved. All original recordings of the interviews shall be destroyed after transcription and interviewees shall not be identified in any report or publication.

**Audio recording** will be done to help in capturing all the views and opinions expressed. The audio will be destroyed after transcribing. Complete anonymity and confidentiality of the individuals is guaranteed.

**Outcome:** The study findings will be used to inform policy-makers about the operational issues in PIP preparation. The findings will also help streamline and improve the process in the coming years. In addition, the findings will be used to inform training programmes and workshops for district health personnel in other district training programmes. A brief of the findings will be shared with you after the study.

For further information, please contact: Dr. Prashanth NS, PhD Fellow, Institute of Public Health, Bangalore. Phone: [REDACTED]

### Informed Consent

I have read and understood the details provided to me about the study through the information sheet above. I hereby consent to participate in the study with the understanding that my views and opinions shall be treated as anonymous.

I also agree to record my opinions. Yes/No.

Signature:

Date:
