# Supplementary material for: How does capacity building of health managers work? A realist evaluation study protocol
Source: PubMed Central journal article supplement — BMJ Open. 2012 Mar 30;2(2):e000882. doi: 10.1136/bmjopen-2012-000882 (PMC3330260; doi:10.1136/bmjopen-2012-000882), 2012-03-30
Supplement: bmjopen-2012-000882.draft_revisions.pdf [file bmjopen-2012-000882.draft_revisions.pdf]

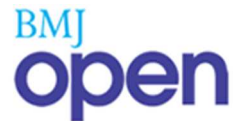

## How does capacity-building of health managers work? A realist evaluation study protocol

|                                 |                                                                                                                                                                                                                                                                                                                                                                                                                                                                                             |
|---------------------------------|---------------------------------------------------------------------------------------------------------------------------------------------------------------------------------------------------------------------------------------------------------------------------------------------------------------------------------------------------------------------------------------------------------------------------------------------------------------------------------------------|
| Journal:                        | <i>BMJ Open</i>                                                                                                                                                                                                                                                                                                                                                                                                                                                                             |
| Manuscript ID:                  | bmjopen-2012-000882                                                                                                                                                                                                                                                                                                                                                                                                                                                                         |
| Article Type:                   | Protocol                                                                                                                                                                                                                                                                                                                                                                                                                                                                                    |
| Date Submitted by the Author:   | 16-Jan-2012                                                                                                                                                                                                                                                                                                                                                                                                                                                                                 |
| Complete List of Authors:       | Prashanth, NS; Institute of Public Health, Marchal, Bruno; Institute of Tropical Medicine, Department of Public Health Hoeree, Tom; Institute of Tropical Medicine, Department of Public Health Narayanan, Devadasan; Institute of Public Health, Macq, Jean; Universit  Catholique de Louvain, Institut de Recherche Sant  et Soci t <br>Kegels, Guy; Institute of Tropical Medicine, Department of Public Health Criel, Bart; Institute of Tropical Medicine, Department of Public Health |
| <b>Primary Subject Heading</b>: | Health services research                                                                                                                                                                                                                                                                                                                                                                                                                                                                    |
| Secondary Subject Heading:      | Public health, Qualitative research, Research methods                                                                                                                                                                                                                                                                                                                                                                                                                                       |
| Keywords:                       | Human resource management < HEALTH SERVICES ADMINISTRATION & MANAGEMENT, Organisational development < HEALTH SERVICES ADMINISTRATION & MANAGEMENT, PUBLIC HEALTH                                                                                                                                                                                                                                                                                                                            |
|                                 |                                                                                                                                                                                                                                                                                                                                                                                                                                                                                             |

SCHOLARONE™  
Manuscripts

only

## Introduction

Health worker availability has been associated with better coverage of programmes such as vaccination as well as better outcomes such as reduced child and maternal mortality [1, 2]. Although the relationship between availability of health service providers and improved mortality outcomes appears straightforward, it is not easy to establish. Issues of health worker performance and their motivation and the contextual factors that shape an enabling environment for health service providers to perform effectively continue to be poorly understood [3]. Early studies exploring associations between health worker availability and health outcomes reported results ranging from “no significant association with infant mortality” to positive associations with infant and maternal mortality and even surprisingly, in one study, an adverse association between doctor availability and infant perinatal mortality, termed ‘doctor anomaly’ [4–6]. Using improved data and design, more recent cross-country regression-based analysis has shown a positive relation between health worker availability and reduced child and maternal mortality, and improved vaccination coverage [7, 8].

The 2006 World Health Report drew attention to the human element in the delivery of health care services by focussing on the health workforce. It identified the forces driving the health workforce (health needs, health systems and contextual factors), and the related workforce challenges (numbers, skill mix, distribution and working conditions) [9]. A well-performing workforce is considered to be a combination of staff being available (retained and present) and staff being competent (productive and responsive) [9]. In order to ensure such conditions, the report suggested policymakers to adopt *good* human resource management (HRM) within the health services. Human resources management (HRM) is the management of people in an organisation. It

1  
2  
3 includes the policies, practices and activities at the disposal of managers to ensure the  
4  
5 availability of staff in their number, with skills needed to discharge their functions  
6  
7 and having the motivation to accomplish the organisation's objectives [10].  
8  
9

10  
11 Sub-optimal performance of health workers is a serious issue requiring urgent  
12  
13 attention as it is linked to morbidity and mortality, and reviews having shown that  
14  
15 health worker performance is critical to achieving good health outcomes across health  
16  
17 conditions, age groups and to achieve the health-related millennium development  
18  
19 goals [11, 12]. The world health report suggested four “practical and low-cost  
20  
21 instruments” of which supportive, yet firm supervision and lifelong learning are  
22  
23 important for a competent and responsive health workforce.  
24  
25

26  
27 However, the difference made by *good* HRM in achieving better performance and  
28  
29 outcomes of health services is poorly researched. There are indeed serious knowledge  
30  
31 and evidence gaps on what kinds of interventions work. This is mainly due to  
32  
33 methodological challenges on measuring HRM practices and performance, and the  
34  
35 paucity of studies on district level interventions on health workforce from low and  
36  
37 middle income countries, where the need for such evidence is most pressing [3, 12].  
38  
39

40  
41 But several reviews also highlight the need for evaluations that can improve our  
42  
43 understanding of “how” such interventions work so that HRM interventions may be  
44  
45 better designed and implemented [1, 3, 13]. Also for this issue, there are few  
46  
47 documented studies [14], despite the relevance of this question for policymakers as  
48  
49 well as health care organisation managers.  
50  
51

52  
53 Experience from action research in capacity building initiatives in 25 of the 28 Indian  
54  
55 states as well as performance reviews of the NRHM highlight the need for systemic  
56  
57 capacity-building on one hand and scientific evaluations of how interventions work  
58  
59  
60

1  
2  
3 (or do not) on the other [38–40]. Paul et al. reviewed several studies at both national  
4  
5 and local level to identify gaps in the Indian health care system; they recommend  
6  
7 interventions and research (among others) to improve decentralised district-level  
8  
9 planning in health services. Given the lack of institutional capacity to utilise financial  
10  
11 or technical inputs, health spending even on the appropriate services may not lead to  
12  
13 actual provision of services [41]. Our study intends to address the evidence gap (how  
14  
15 do district level training interventions improve performance?) and will contribute to  
16  
17 the evidence base for better design of health workforce interventions.  
18  
19

20  
21 Finally, more knowledge is needed regarding the role of context. HRM interventions  
22  
23 are implemented within existing health systems. Context matters: what works in one  
24  
25 setting does not necessarily work in another setting in the same country and may  
26  
27 perhaps even not work in the same setting at another moment in time. Evidence on  
28  
29 effectiveness of HRM interventions is either scanty or flawed due to poorly designed  
30  
31 research [15].  
32  
33

34  
35 In this paper, we present the protocol of an evaluation of a district-level capacity-  
36  
37 building intervention in Karnataka State (India) that aims at responding to the  
38  
39 effectiveness question, but also to the causality question. Inspired by principles of  
40  
41 realist evaluation, this study focuses on identifying the determinants of performance  
42  
43 of health workers in managerial positions, and to understand how changes are brought  
44  
45 about.  
46  
47  
48

49  
50 The capacity-building intervention we assess aims to improve the capacity of health  
51  
52 managers to conduct the planning and supervision of health services. These managers  
53  
54 are posted at district and sub-district (*taluka*) levels (a *taluka* is an administrative sub-  
55  
56  
57  
58  
59  
60

1  
2  
3 division of a district, with population ranging from 100,000 to 200,000). It does so by  
4  
5 combining class-based lectures with in-service ‘mentoring’, where trainers and  
6  
7 faculty visit participants in their workplace to further build on the classroom teaching  
8  
9 and to help participants apply the teaching in their working environment.  
10

## 11 12 13 **Methods**

### 14 15 *Aim*

16  
17 We will carry out an evaluation study of a capacity-building intervention at district  
18  
19 level in Karnataka state (figure 1). The aim of the study is to understand how capacity  
20  
21 building in health district management works. This study will first describe the  
22  
23 structure and nature of the intervention and, second, design tools to determine  
24  
25 whether and how it brought about the changes that it sought to bring about and  
26  
27 through what mechanisms these changes were achieved.  
28  
29  
30  
31

32 **Figure 1** Map of India showing Karnataka state (shaded red) in south India  
33  
34  
35  
36

### 37 *Study objectives*

- 38  
39 1. To determine if a district level capacity-building programme is associated with  
40  
41 improvement of planning and supervision practices in Tumkur district,  
42  
43 Karnataka state
- 44  
45 2. To identify and describe the plausible mechanisms for changes in planning  
46  
47 and supervision practices, if any
- 48  
49 3. To develop recommendations for better design and implementation of  
50  
51 capacity-building interventions for health services managers in Karnataka  
52  
53  
54  
55  
56  
57  
58  
59  
60

4. To contribute to the development of a methodological framework for the scientific evaluation of complex HRM interventions at local health care system level

### *Research question*

Based on these objectives, we framed the following research questions (one main question with three sub-questions) to be addressed in the study as follows:

“How does a training programme for health managers at district level that consists of contact classes and mentoring have an impact on their planning and supervision practices?”

1. What are the interventions’ elements that are associated with improvement of planning and supervision practices?
2. Was there an association between greater participation in the intervention (classroom training and mentoring) and improved planning and/or supervision practices?
3. How might a training programme change management practices of health managers with respect to the preparation of annual plans and supportive supervision?

### *Setting*

The study will be conducted in two districts (i.e. local health care system) of the state of Karnataka in India (figure 2). Karnataka is one of the average-performance states in India with respect to health outcomes – the ‘average’ is concealing wide disparities between districts. For instance, in 2008, coverage of immunisation for children was over 90% in Kodagu district, while it was below 50% in Raichur district [16]. The

1  
2  
3 study will take place in Tumkur and Raichur district. Of the 30 districts in Karnataka,  
4  
5 Tumkur is the fourth largest in terms of population (total population - 2,681,449  
6  
7 people) and the third largest district in Karnataka in terms of size (total area - 10,597  
8  
9 sq. km) with only 20% urban population and at least half the population recognised as  
10  
11 being below the poverty line [17, 18]. The district has 10 *talukas*. In view of its large  
12  
13 size, average socio-economic indices and ‘average’ health performance in terms of its  
14  
15 outcomes, Tumkur could be considered a typical district of Karnataka. The  
16  
17 government classifies Raichur district in northern Karnataka as having several *talukas*  
18  
19 that are ‘backward’, but it ranked 14th among the (then) 27 districts in terms of health  
20  
21 indicators. On the same index, Tumkur was ranked ninth [19]. These two districts are  
22  
23 purposively selected as they are roughly comparable to each other in terms of health  
24  
25 management and outcomes.  
26  
27  
28

29  
30 **Figure 2** Map of Karnataka state showing Tumkur district (shaded blue) and Raichur  
31  
32 district (shaded green)  
33  
34  
35

### 36 *The intervention*

37  
38 In 2009, Tumkur district was chosen to pilot a capacity-building programme. The  
39  
40 programme was implemented in the district by a consortium of five Indian  
41  
42 organisations, called *Swasthya Karnataka* in partnership with the government of  
43  
44 Karnataka (see figure 3 for structure of the capacity-building programme, key actors  
45  
46 involved and timeline). It consists of 12 modules on public health management topics,  
47  
48 delivered through classroom teaching for two or three days per month in a residential  
49  
50 training programme for all staff involved in management of health services at taluka  
51  
52 and district levels, along with mentoring of these participants on a monthly basis at  
53  
54 their workplace. One of the main objectives of the intervention was to improve  
55  
56  
57  
58  
59  
60

1  
2  
3 planning and supervision practices of health managers through providing knowledge  
4 of public health planning principles, improving their skills in planning and  
5 supervision as well as bringing about a *can-do* attitude towards organisational change.  
6  
7  
8  
9  
10 The programme began in August 2009; the monthly contact classes for health  
11 managers ended in January 2011 and mentoring is in progress as of December 2011.  
12  
13

14  
15  
16 **Figure 3** Schematic showing the structure of the capacity-building intervention in  
17 Tumkur along with key actors and timeline  
18  
19

### 20 21 22 23 *Study design*

24  
25 Marchal [20] reviewed the methodological debate around the use of (quasi-)  
26  
27 experimental study designs in complex interventions and scientific evaluations in  
28 health systems research. He builds a case for using the realist evaluation approach in  
29 research on complex interventions in health systems. He presents the results of a  
30 realist evaluation of the role of workforce management in well-performing health care  
31 organisations and identified some mechanisms underlying the better performance of  
32 these well-performing hospitals [20]. In line with this approach, we will carry out a  
33 realist evaluation of the capacity-building programme in Tumkur, using a mix of  
34 quantitative and qualitative methods. The characteristics of the intervention that  
35 support the choice of realist evaluation are presented in the discussion (see below).  
36  
37  
38  
39  
40  
41  
42  
43  
44  
45  
46  
47  
48  
49

50 Our study design is determined by the following considerations:

- 51  
52 1. Classical controlled (quasi-)experimental designs are limited to answering  
53 *whether* a particular intervention (usually measured as treatment variables)  
54  
55 was associated with an observed pre-defined outcome. They do not answer the  
56  
57  
58  
59  
60



1  
2  
3 questions *how*, *why*, and *under what conditions* the intervention worked (or  
4 did not). Besides enabling an understanding of the changes in planning and  
5 supervision practices in course of the intervention, the study design should  
6 also generate valid explanations for why and how the results observed were  
7 achieved.  
8  
9

- 10  
11  
12  
13  
14 2. HRM interventions are implemented in existing health system settings. Hence,  
15 the researcher cannot *manipulate* all treatment variables for the purposes of  
16 testing *a priori* hypotheses, either because the context of the intervention does  
17 not support this or for ethical reasons. Although hypothesis testing should be  
18 central to discovery of the mechanisms, such hypotheses should be derived  
19 from the possibilities permitted by the context within which the intervention is  
20 being implemented.  
21  
22  
23  
24  
25  
26  
27  
28  
29  
30  
31

32 In order to understand whether, and how the intervention produces a change in  
33 managerial practices at the district level, we will carry out the study in six steps. In  
34 figure 4, a schematic shows the sequence of steps (steps A, B1-2, C, D, E and F) with  
35 the questions that will be addressed at each step and the corresponding methods.  
36 The various phases of our study design follow the logic presented in the six-step  
37 framework developed by Van Belle et al [21]. The six steps they describe refer to a  
38 theory-driven evaluation where evaluators reconstruct the assumptions based on  
39 which the programme was designed (programme theory) in order to *refine* it through  
40 *testing* and verifying. Based on this process, an improved programme theory is  
41 developed, which explains how the intervention and outcome are related. Realist  
42 evaluation is a type of theory-driven evaluation [22] that generates a theory  
43 explaining the mechanisms through which the outcomes were brought about in a  
44  
45  
46  
47  
48  
49  
50  
51  
52  
53  
54  
55  
56  
57  
58  
59  
60

1  
2  
3 given context. We found the steps used by Van Belle et al. useful to organise and  
4 describe the steps in this study. The steps A-F below refer to the steps in our design as  
5 shown in figure 4; the six steps of Van Belle et al. are referred to as numbers (steps 1-  
6 6; see figure 5). The scope of the evaluation and appropriateness of realist evaluation  
7 (corresponding to step 1 of Van Belle framework) is presented in the Discussion  
8 section (see below).  
9  
10  
11  
12  
13  
14  
15  
16  
17  
18

19 **Figure 4** Study design showing steps A to F

20 **Figure 5** Six steps proposed by Van Belle and colleagues [21]

21  
22  
23  
24  
25 The study starts with a reconstruction of the initial programme theory of the  
26 intervention (step A in figure 4) corresponding to steps 1 and 2 of the Van Belle  
27 framework. A *programme theory* that may be presented in the form of a *logic model*  
28 is a reconstruction of the assumptions and steps through which the intervention is  
29 expected to reach the expected outcomes. An initial programme theory will be the  
30 starting point for the study by providing a basis for the questions and tools of the  
31 subsequent qualitative and quantitative data collection phases. In figure 6, a simplified  
32 hypothetical causal chain based on the programme theory is presented. It links the  
33 intervention inputs (contact classes and mentoring) to the expected outputs (improved  
34 planning and supervision practices).  
35  
36  
37  
38  
39  
40  
41  
42  
43  
44  
45  
46  
47  
48  
49  
50  
51  
52  
53  
54  
55  
56  
57  
58  
59  
60

51 **Figure 6** Hypothetical pathways to change based on initial reconstruction of  
52 programme theory and literature

1  
2  
3 In steps B and C, we will use a mix of qualitative and quantitative methods to  
4 understand the process of planning and supervision and whether and how it changed  
5 in the course of the intervention[23]. In step B, we will measure perceptions about  
6 training, planning and supervision, organizational commitment, self-efficacy in  
7 problem-solving and nature of supervision among participants and non-participants  
8 through a survey in Raichur and Tumkur districts of Karnataka. Organisational  
9 change in health services is an outcome of individual, institutional and contextual  
10 factors. Existing theories of behavioural change in health services conceptualise that  
11 interventions operate at one or more of these three spheres of influence (figure 7).  
12  
13  
14  
15  
16  
17  
18  
19  
20  
21  
22  
23  
24

25 **Figure 7** Theories of behavioural change in health services in relation to their sphere  
26 of influence  
27

28  
29 A hypothetical causal pathway (figure 6) that links the intervention inputs and the  
30 outputs, and a review of literature (figure 7) on what we know about HRM  
31 interventions were used to choose the variables and design the tools for the survey.  
32  
33  
34  
35  
36  
37  
38

39 In step C, we will use qualitative methods to document and understand the changes in  
40 planning and supervision practices before, during and after the intervention in  
41 Tumkur district. In this phase, we will also determine the contextual factors that  
42 influence planning and supervision in the district, especially other programmes  
43 initiated by the state health authorities that have similar or overlapping objectives  
44 with the intervention. The National Rural Health Mission (NRHM) is a nation-wide  
45 initiative of the Indian government that seeks to improve district level planning and  
46 supervision and implements this through the creation of a district and taluka  
47 programme management unit. NRHM introduced technical and human resource  
48  
49  
50  
51  
52  
53  
54  
55  
56  
57  
58  
59  
60

1  
2  
3 inputs into the health system in the form of decentralised annual action plans and  
4  
5 placement of young management professionals at taluka and district levels for  
6  
7 planning and supervision of the plans.  
8  
9

10  
11 The data from steps B and C will be analysed and interpreted together in step D to  
12  
13 understand the relationships between the elements of the initial hypothetical causal  
14  
15 chain. This will result in an improved theory linking the inputs, intermediate steps and  
16  
17 the effect of contextual factors. We will then formulate – in step E – explanatory  
18  
19 context-mechanism-outcome configurations based on the interpretation in step D that  
20  
21 will be validated through a fresh round of data collection using qualitative methods.  
22  
23 An iterative analysis of findings from steps C, D and E will be conducted so as to  
24  
25 build an internally consistent and valid explanation in step F on “what elements of the  
26  
27 intervention worked, for whom and under what conditions”. The last three steps in our  
28  
29 study (steps D, E and F) correspond to the last three steps of the Van Belle  
30  
31 framework.  
32  
33  
34  
35  
36  
37  
38

### 39 *Methods and tools*

40  
41 Realist evaluation is method-neutral; it allows for the use of mixed methods, whereby  
42  
43 the choice of data collection and analysis methods is determined by the nature of the  
44  
45 research questions and of the programme theory [24]. The methods and tools for data  
46  
47 collection are determined by each step (qualitative or quantitative) and the nature of  
48  
49 questions asked at this step (see schematic in figure 4). A summary of the tools and  
50  
51 expected outcomes at each step is shown in Table 1.  
52  
53  
54  
55  
56  
57  
58  
59  
60

**Table 1: Details of the tools, sampling and expected outcomes**

| Step                                                           | Methods/tools                                                                                                                                                                                                                                               | Sampling/selection of respondents                                                                                                          | Analysis and expected outcome                                                                                                                                                                                                                                                                                     |
|----------------------------------------------------------------|-------------------------------------------------------------------------------------------------------------------------------------------------------------------------------------------------------------------------------------------------------------|--------------------------------------------------------------------------------------------------------------------------------------------|-------------------------------------------------------------------------------------------------------------------------------------------------------------------------------------------------------------------------------------------------------------------------------------------------------------------|
| Step A<br>Reconstruction of programme theory                   | Desk review of intervention design, proposal, annual district level plans, reports and interviews with the people who designed and are implementing the intervention. Review of theories of behavioural change in health services                           | Not applicable for review of documents; purposive sampling for interviews                                                                  | - Initial programme theory and a hypothetical causal pathway linking intervention inputs and expected outcomes<br>- Summary of theories of organisational change in relation to their spheres of influence                                                                                                        |
| Steps B1 and B2<br>Data collection – quantitative (process)    | Construct survey questionnaire based on a review of theories of behavioural change in health care organisations and reconstruction of initial programme theory from step A                                                                                  | All health managers in intervention and control district who agree to participate (about 100 in all; about 60 in Tumkur and 40 in Raichur) | Key outcome variables for survey<br>- Attitudes to training programmes and district planning<br>- Organisational commitment<br>- Self-efficacy<br>- Attitude towards receiving and providing supervision<br>Statistical analysis to determine relationship among variables and effect of exposure to intervention |
| Step C<br>Data collection – qualitative (context and outcomes) | Assess action plans before, during and after intervention; assess performance and outcomes using routine institutional data and interview participants and non-participants at district and taluka level to understand changes in the course of three years | Purposive, based on exposure to intervention                                                                                               | Analysis of the qualitative data to understand how planning and supervision practices changed in the course of the intervention as well as how other contextual determinants influenced these changes                                                                                                             |
| Step D<br>Analysis (context-mechanism-outcome configurations)  | Analyse findings from B2 and C to understand the relationship between various elements in the hypothetical causal chain and the contribution of contextual factors to the outcomes observed                                                                 | Desk review and joint analysis of findings                                                                                                 | Further refining of the initial programme theory by the improved understanding from the application of qualitative and quantitative methods                                                                                                                                                                       |
| Steps E & F<br>(Validation and refining the theory)            | Formulate context-mechanism-outcome configurations and verify through fresh                                                                                                                                                                                 | Purposive sampling of participant and non-participant health managers in both                                                              | An internally consistent and valid explanation of “what components of the intervention                                                                                                                                                                                                                            |

---

|                                                                                |           |                                             |
|--------------------------------------------------------------------------------|-----------|---------------------------------------------|
| data collection as well as re-looking at the earlier findings (steps B2 and C) | districts | worked, for whom and under what conditions” |
|--------------------------------------------------------------------------------|-----------|---------------------------------------------|

---

The questionnaire used in the survey (step B) includes six modules (modules B to G in supplementary file 1) to measure attitude towards planning and training programmes, organisational commitment, self-efficacy and supportive nature of supervision. The module on organisational commitment (module C in supplementary file 1) is adapted from two versions of the Meyer and Allen organisational commitment questionnaire that were tested and validated in public services in south Asian settings [25–27]. A five-point Likert scale is used to grade responses. Self-efficacy in managing conflict situations usually faced by managers of health services is measured with a ten-item scale based on the Bandura scale[28] that was developed for use across cultures and has been demonstrated to have cross-cultural equivalence across several languages [29–32]. The supportive nature of supervision is measured using 14 items on a five-point Likert scale. We adopted eight items measuring supportive supervision and 4 items measuring non-controlling supervision from Oldham and Cummings, which in turn is based on the Michigan organizational assessment package [33, 34]. We added two items to measure controlling supervision. The questionnaire will be piloted among public health experts and *taluka*-level health managers. The pilot will be used to improve the understandability of the questions, as some of the tools have not earlier been tested among south Indian health services staff. Exposure of participants to the intervention, type of participation and their performance during and immediately after the training programme and mentoring will be captured through analysis of secondary data from attendance records, monthly reports of the training programme and visit notes by mentors.

1  
2  
3 In step C, we will conduct document review, compile routine health information data  
4  
5 on performance, conduct interviews using a semi-structured interview guide  
6  
7 (supplementary file 2) and undertake non-participant observation.  
8  
9

### 10 11 *Sampling*

12  
13 The survey (step B) will be conducted among all health managers in the district. For  
14  
15 the purpose of this study, a health manager is defined as a health worker in the  
16  
17 government services, who is managing a facility, team or institutions at the *taluka* or  
18  
19 district level. The questionnaire will be administered among the health managers in  
20  
21 the two study districts, Tumkur and Raichur. They will be invited to participate  
22  
23 voluntarily in the study. The first author (NSP) or one of two trained data collectors  
24  
25 will visit the health managers their place of work by fixing prior appointment at a  
26  
27 time convenient to them to ensure good recruitment. The data collectors will be  
28  
29 trained to answer questions about the questionnaire and the nature of the study, as  
30  
31 well as to clarify doubts arising in the course of filling the questionnaire.  
32  
33  
34  
35  
36  
37

38  
39 In steps C and E, we will carry out purposive sampling; in step C, we will choose  
40  
41 respondents for interviews in order to interview people ranging from no exposure to  
42  
43 the intervention to people who have participated most in the intervention. In step E,  
44  
45 data collection will be done through participant observation and will be iterative in  
46  
47 nature. It will be based on the findings of steps B2 and C. We shall select participant  
48  
49 health managers purposively in Tumkur district as well as non-participant health  
50  
51 managers with similar outcomes from Raichur district to understand which ones  
52  
53 among them achieved organisational change and to what extent this was facilitated (or  
54  
55  
56  
57  
58  
59  
60

1  
2  
3 not) by the capacity-building programme or individual, systemic or contextual factors  
4  
5 (see figure 7).  
6  
7  
8

9  
10 *Analysis*

11 The quantitative data from the questionnaire will be examined (step B2) and  
12  
13 descriptive parametric measures for organisational commitment, self-efficacy and  
14  
15 nature of supervision will be calculated. Participation in training and mentoring  
16  
17 (exposure) among the health managers in Tumkur district will be measured through  
18  
19 secondary documents (attendance and mentoring notes). We will apply statistical tests  
20  
21 of differences between groups to determine the degree of association between  
22  
23 exposure to training and the measures of organisational commitment, self-efficacy  
24  
25 and nature of supervision.  
26  
27  
28

29  
30  
31 We will analyse interview transcripts (step C) using content analysis to understand the  
32  
33 process of planning at district and *taluka* levels. We will use triangulation by  
34  
35 systematically sorting through the qualitative data from the observation notes,  
36  
37 interviews and secondary document analysis to find common themes or categories by  
38  
39 eliminating overlapping areas.  
40  
41  
42

43  
44  
45 The results of the qualitative and quantitative phases will then be analysed together  
46  
47 (step D) to develop plausible explanatory context-mechanism-outcome configurations  
48  
49 that explain who performs better with respect to planning and supervision in response  
50  
51 to a training-mentoring programme in a district. The result from the analysis of  
52  
53 participant observation field notes (step E) will be used to validate this framework and  
54  
55 refine the initial programme theory. This phase of joint quantitative and qualitative  
56  
57  
58  
59  
60



1  
2  
3 analysis will be iterative – we will refine the framework through purposive participant  
4  
5 observation visits and interviews. By taking into consideration the context within  
6  
7 which a given outcome was observed, and testing and validating explanatory  
8  
9 configurations of these three (context, mechanism and outcome), we will explain how  
10  
11 the intervention brought about the changes observed in planning and supervision  
12  
13 practices.  
14  
15

### 16 17 18 *Ethics* 19

20 The protocol of this study was approved by the Institutional Review Board of the  
21  
22 Institute of Tropical Medicine, Antwerp and by the Institutional Ethics Committee of  
23  
24 Institute of Public Health, Bangalore.  
25  
26  
27

28  
29 All participants shall be made aware of their participation in the study through formal  
30  
31 correspondence. They will have the option to decline participation in the study, and it  
32  
33 will be ensured that non-participation will not affect further participation in the  
34  
35 training programme. In addition, written consent shall be obtained for each interview.  
36  
37 The study proposal shall be shared with the state health authority and permission shall  
38  
39 be sought to access routine health data, reporting formats and meeting proceedings.  
40  
41  
42

43  
44 Questionnaires and interview transcripts shall be coded to ensure confidentiality of all  
45  
46 ideas/opinions expressed by participants in the course of the study. None of the study  
47  
48 outcomes shall identify participants by name or exact designation to avoid potential  
49  
50 professional or personal harm to the participants in view of opinions/ideas expressed  
51  
52 by them.  
53  
54  
55  
56  
57  
58  
59  
60

1  
2  
3 The language of interaction with participants will be either English or Kannada (the  
4 local language in the state of Karnataka) in function of their preference; this would be  
5 established at the beginning of the interaction. Consent forms shall be made available  
6 in both English and Kannada (supplementary files 3 and 4) and the participant will  
7 have a choice to read and understand the nature of study in the language of their  
8 choice and decide accordingly. The content shall also be orally explained to the  
9 participant by the trained data collector in the case of the self-administered  
10 questionnaire and the interviewer in the case of interviews. All interviews shall be  
11 conducted at a time and venue indicated by the participant with prior appointment.  
12 The approval for audio recording of interviews shall be sought separately in addition  
13 to the consent for taking notes of the interview.  
14  
15  
16  
17  
18  
19  
20  
21  
22  
23  
24  
25  
26  
27  
28  
29

30 The participant shall have the right to revoke or withdraw consent to part or all of  
31 what he has expressed during the study period. In case of collection of any document  
32 outside of public domain (for example privileged communication between district  
33 authorities), a permission letter shall be obtained from the authorised official.  
34  
35  
36  
37  
38  
39

40 There is no interaction with patients in the course of the study.  
41  
42  
43  
44

#### 45 *Quality control*

46  
47 All the data from the qualitative data collection methods will be organised on Nvivo  
48 software with clear documentation of the procedures adopted and consistent file  
49 naming. Analysis of the interview transcripts, categorisation and analysis will be  
50 crosschecked by two researchers.  
51  
52  
53  
54  
55  
56  
57  
58  
59  
60

1  
2  
3 For each survey respondent, the data collector will check the questionnaire for  
4 completeness. Before data entry, a member of the study team will scan all  
5 questionnaires for errors. The data will be entered into a spreadsheet using a software  
6 for programmed data entry (Epidata) with in-built validity checks and error detection  
7 (supplementary file 5)[35].  
8  
9  
10  
11  
12  
13

## 14 15 16 17 **Discussion** 18

19  
20 HRM interventions at the district level are complex; the outputs are produced as a  
21 result of interactions between several actors and institutions within a given context  
22 resulting in a web of processes, which are difficult to map in a straightforward, linear  
23 manner. It is being increasingly recognised that such interventions present a  
24 methodological challenge [42, 43]. This study intends to improve our understanding  
25 of scientific evaluation of complex interventions in HRM in health. The capacity-  
26 building programme in Tumkur has all the features of a complex intervention as  
27 described by the new guidance of the Medical Research Council (MRC) on  
28 developing and evaluating complex interventions. The guidance lists some  
29 dimensions of complexity – “the number of and interactions between components  
30 within the experimental and control interventions (if identified), number and difficulty  
31 of behaviours required by those delivering or receiving the intervention, number of  
32 groups or organisational levels targeted by the intervention, number and variability of  
33 outcomes and degree of flexibility or tailoring of the intervention permitted”. The  
34 latest 2008 guidance of MRC, while acknowledging the limitations of experimental  
35 designs, notes that inclusion of a process evaluation in complex interventions “is a  
36 good investment to explain discrepancies between expected and observed outcomes,  
37  
38  
39  
40  
41  
42  
43  
44  
45  
46  
47  
48  
49  
50  
51  
52  
53  
54  
55  
56  
57  
58  
59  
60

1  
2  
3 to understand how context influences outcomes, and to provide insights to aid  
4 implementation”. The recent guidance builds on the experience gained in  
5  
6  
7 understanding the limitations of the earlier experimental designs and suggests the use  
8  
9  
10 of a “more flexible, and less linear model of the process, giving due weight to the  
11  
12 development and implementation phases, as well as to evaluation” [44]. This is  
13  
14 further reinforced by Campbell et al. [40] who emphasise the need to use a mix of  
15  
16 qualitative and quantitative evidence that needs to be applied to an (often) iterative  
17  
18 process of framework development and testing.  
19  
20

### 21 22 23 *Realist evaluation of HRM interventions*

24  
25 Conduct of trial-based studies in social systems has limitations in view of the lack of  
26  
27 ‘control’ over the contextual and operational factors that affect the observations.  
28  
29 Although a potentially verifiable causal chain that connects an intervention and a  
30  
31 hypothesised outcome linked together through sequential steps is often appropriate for  
32  
33 scientific evaluation, the responses of social systems to new approaches are very often  
34  
35 difficult to ‘reduce’ to such a testable succession of steps with cause-effect  
36  
37 relationships [21, 22, 45]. Increasingly, social programme evaluations have been  
38  
39 encouraged to look beyond the “successionist” format of experimental design that is  
40  
41 well suited for classical bio-medical research. At the first WHO health systems  
42  
43 research symposium at Montreux in 2010, a strong call was made to strengthen the  
44  
45 evidence base for capacity development through “proper evaluation of capacity  
46  
47 development initiatives” and use of multi-method approaches to overcome the  
48  
49 difficulties imposed by the complexity of human resources in health interventions [46,  
50  
51 47]. Realist evaluation precisely posits that programmes are embedded in social  
52  
53 systems and stresses the importance of understanding *what works for whom and*  
54  
55  
56  
57  
58  
59  
60

1  
2  
3 *under what conditions*. It offers a framework to design scientific evaluations of  
4  
5 human resource interventions. Based on a review of literature on choice of methods  
6  
7 for complex interventions, Marchal [20] reports that experimental or quasi-  
8  
9 experimental designs “are indicated when the effectiveness of an intervention should  
10  
11 be tested” and are by themselves inadequate to answer and explain how interventions  
12  
13 work, an analysis supported by several other reviews [40, 43, 46].  
14  
15

16  
17  
18 Health worker practices are complex behaviours that are determined by various  
19  
20 individual, systemic or institutional and contextual factors [12]. In their review of  
21  
22 theories of behavioural change in health services, Rowe et al. [12] question the  
23  
24 premise that poor organisational performance in health is merely due to the lack of  
25  
26 knowledge and skills. They encourage studies to move beyond the old paradigm “that  
27  
28 most performance problems can be solved by training alone”. In the Tumkur capacity-  
29  
30 building intervention, a reconstruction of the assumptions of the intervention and how  
31  
32 it sought to change planning and supervision practices is established. The outcomes  
33  
34 (i.e. better planning and supervision practices) are determined by several factors at the  
35  
36 individual (improved knowledge and skills), institutional (competence, enabling  
37  
38 environment, motivation to apply/change) and contextual (other programmes or  
39  
40 interventions with similar objectives and many other contextual factors that may  
41  
42 facilitate or discourage organisational change) levels. In order to understand *how* the  
43  
44 programme worked, we will further build and refine these hypothetical pathways  
45  
46 based on a review of literature and the study findings to arrive at context-mechanism-  
47  
48 outcome configurations.  
49  
50  
51  
52  
53  
54  
55  
56  
57  
58  
59  
60

1  
2  
3 Realist evaluation presents a scientific approach towards understanding mechanisms  
4 through which social interventions work. According to Pawson and Tilley [49],  
5 “Programs work (have successful ‘outcomes’) only insofar as they introduce the  
6 appropriate ideas and opportunities (‘mechanisms’) to groups in the appropriate social  
7 and cultural conditions (‘contexts’)”. By building and testing such Context (C)-  
8 Mechanism (M)-Outcome (O) or CMO configurations within the *talukas*, it is  
9 possible to generate an internally consistent and externally valid knowledge of how  
10 such interventions work in a given context to produce an observed outcome [22].  
11  
12  
13  
14  
15  
16  
17  
18  
19  
20  
21  
22

23 Existing theories on behavioural change in health services can be divided into those  
24 that explain change at or between individual, institutional or contextual levels, and  
25 thus evaluations must consider all these levels while trying to explain behavioural  
26 change (figure 7). The variables we chose to measure (attitude towards training,  
27 organisational commitment, self-efficacy, nature of supervision) have all been linked  
28 to behavioural change and improvement in organisations and a preliminary desk  
29 review of the training reports and documents suggests that these are also linked to the  
30 intervention in Tumkur.  
31  
32  
33  
34  
35  
36  
37  
38  
39  
40  
41  
42  
43  
44

### 45 **Contributorship**

46 NSP, ND, BC and GK conceived and designed the study. NSP, BM and GK  
47 developed the methodology. NSP, TH, BC and JM developed the tools. NSP wrote  
48 the first draft of the present manuscript. All authors reviewed the first draft. All  
49 authors read and approved the submitted manuscript.  
50  
51  
52  
53  
54  
55  
56  
57  
58  
59  
60

## Funding

No specific funding.

## References

1. Haines A, Kuruville S, Borchert M: **Bridging the implementation gap between knowledge and action for health.** *Bulletin of the World Health Organization* 2004, **82**:724-31.
2. Speybroeck N, Kinfu Y, Poz MR Dal: **Reassessing the relationship between human resources for health, intervention coverage and health outcomes.** *Background papers for The World Health Report 2006* 2006:14.
3. Dieleman M, Gerretsen B, Wilt GJ van der: **Human resource management interventions to improve health workers' performance in low and middle income countries: a realist review.** *Health research policy and systems* 2009, **7**:7.
4. Kim K, Moody PM: **More resources better health? A cross-national perspective.** *Social Science & Medicine* 1992, **34**:837-42.
5. Hertz E: **Social and environmental factors and life expectancy, infant mortality, and maternal mortality rates: Results of a cross-national comparison.** *Social Science & Medicine* 1994, **39**:105-114.
6. Cochrane A, Leger AS, Moore F: **Health service 'input' and mortality 'output' in developed countries.** *Journal of Epidemiology and Community Health* 1978, **32**:200-205.
7. Anand S, Bärnighausen T: **Human resources and health outcomes: cross-country econometric study.** *Lancet* 2004, **364**:1603-9.
8. Anand S, Bärnighausen T: **Health workers and vaccination coverage in developing countries: an econometric analysis.** *The Lancet* 2007, **369**:1277-85.
9. WHO: *Working together for health: The World Health Report 2006.* 2006:237.

10. Mathauer I, Imhoff I: **Health worker motivation in Africa: the role of non-financial incentives and human resource management tools.** *Human resources for health* 2006, **4**:24.
11. Hongoro C, McPake B: **How to bridge the gap in human resources for health.** *The Lancet* 2004, **364**:1451–1456.
12. Rowe A, Desavigny D, Lanata C, Victora C: **How can we achieve and maintain high-quality performance of health workers in low-resource settings?** *The Lancet* 2005, **366**:1026-1035.
13. Chopra M, Munro S, Lavis J, G V, Bennett S: **Effects of policy options for human resources for health: an analysis of systematic reviews.** *The Lancet* 2008, **371**:668-674.
14. Buchan J: **Human Resources for Health What difference does (“ good ”) HRM make□?** *Human Resources for Health* 2004, **7**:1-7.
15. Siddiqi K, Newell J, Robinson M: **Getting evidence into practice: what works in developing countries?** *International Journal for Quality in Health Care* 2005, **17**:447-453.
16. International Institute for Population Sciences: **Raichur district fact sheet 2007-08.** *Ministry of Health and Family Welfare, Government of India* 2008:10.
17. Office of the Registrar General & Census Commissioner: **Provisional Population Totals Paper 1 of 2011 India Series 1.** 2011:188.
18. Devadasan N, Prashanth NS, Sudarshan H: **Tumkur health status report.** *Institute of Public Health, Bangalore* 2011:44.
19. Government of Karnataka: *Investing in human development: Karnataka Human Development Report 2005.* Bangalore: Department of Planning and Statistics, Government of Karnataka; 2005.
20. Marchal B: **Why do some hospitals perform better than others□? A realist evaluation of the role of health workforce management in well-performing health care organisations.** *Medicine* 2011:227.
21. Van Belle SB, Marchal B, Dubourg D, Kegels G: **How to develop a theory-driven evaluation design? Lessons learned from an adolescent sexual and reproductive health programme in West Africa.** *BMC public health* 2010, **10**:741.
22. Pawson R, Tilley N: **Realist evaluation.** In *DPRN Thematic Meeting 2006 Report on Evaluation.* Development Policy Review Network; 2008:35.
23. Creswell JW, Clark VLP: **Choosing a mixed methods design.** In *Designing and Conducting Mixed Methods Research.* 2nd edition. edited by Creswell JW, Clark VLP Sage; 2006:58-89.



- 1  
2  
3 24. Pawson R, Tilley N: *Realistic Evaluation*. London: Sage Publications; 1997.
- 4  
5 25. Gautam T, van Dick R, Wagner U: **Organizational Commitment in Nepalese**  
6 **Settings**. *Asian Journal of Social Psychology* 2001, **4**:239-248.
- 7  
8 26. Tayyab S: **Antecedents and consequences of organizational commitment in**  
9 **Pakistan**. 2006:233.
- 10  
11 27. Tayyab S: **An empirical assessment of organizational commitment measures**.  
12 *Pakistan Journal of Psychological Research* 2007, **22**:Sum 2007:1-21.
- 13  
14 28. Bandura A: **Guide for constructing self-efficacy scales**. In *Self-Efficacy Beliefs*  
15 *of Adolescents*. edited by Pajares F, Urdan TC Information Age Publishing; 2006:307-  
16 337.
- 17  
18 29. Schwarzer R, Jerusalem M: **Generalized Self-Efficacy scale**. In *Measures in*  
19 *health psychology: A user's portfolio*. edited by Weinman J, Wright S, Johnston M  
20 Windsor, England: NFER-NELSON; 1995:35-37.
- 21  
22 30. Luszczynska A, Gutierrez-Dona B, Schwarzer R: **General self-efficacy in**  
23 **various domains of human functioning: Evidence from five countries**.  
24 *International Journal of Psychology* 2005, **40**:80-89.
- 25  
26 31. Luszczynska A, Scholz U, Schwarzer R: **The general self-efficacy scale:**  
27 **multicultural validation studies**. *The Journal of psychology* 2005, **139**:439-57.
- 28  
29 32. Bandura A: **Self-efficacy mechanism in human agency**. *American Psychologist*  
30 1982, **37**:122-147.
- 31  
32 33. Oldham GR, Cummings A: **Employee Creativity: Personal and Contextual**  
33 **Factors At Work**. *Academy of Management Journal* 1996, **39**:607-634.
- 34  
35 34. Cammann C, Fichman M, Jenkins G, Klesh J: *The Michigan Organizational*  
36 *Assessment Package*. Ann Arbor, Michigan: University of Michigan Survey Research  
37 Center; 1978.
- 38  
39 35. **A comprehensive tool for validated entry and documentation of data**  
40 [http://www.epidata.dk].
- 41  
42 36. Reddy KS, Patel V, Jha P, et al.: **Towards achievement of universal health care**  
43 **in India by 2020: a call to action**. *The Lancet* 2011, **377**:760-8.
- 44  
45 37. Government of India: *National Rural Health Mission (2005-2012) Mission*  
46 *Document*. New Delhi: 2005, **49**:17.
- 47  
48 38. Potter C, Brough R: **Systemic capacity building: a hierarchy of needs**. *Health*  
49 *Policy and Planning* 2004, **19**:336-345.
- 50  
51 39. National Rural Health Mission: **Fourth Common Review Mission Report**.  
52 2010:130.
- 53  
54  
55  
56  
57  
58  
59  
60

- 1  
2  
3 40. Bajpai N, Towle M, Vynatheya J: **Model districts as a roadmap for public**  
4 **health scale-up in India.** *Public Health* 2011:21.  
5  
6  
7 41. Filmer D, Hammer JS, Pritchett LH: **Weak links in the chain II: a prescription**  
8 **for health policy in poor countries.** *The World Bank Research Observer* 2002,  
9 17:47.  
10  
11 42. Campbell NC, Murray E, Darbyshire J, et al.: **Designing and evaluating complex**  
12 **interventions to improve health care.** *British Medical Journal* 2007, 334:455.  
13  
14 43. Brown L, LaFond A, Macintyre K: **Measuring capacity building.** *Chapel Hill:*  
15 *MEASURE Evaluation* 2001.  
16  
17 44. Craig P, Dieppe P, Macintyre S, Mitchie S, Nazareth I, Petticrew M: **Developing**  
18 **and evaluating complex interventions: the new Medical Research Council**  
19 **guidance.** *British Medical Journal* 2008, 337:a1655-a1655.  
20  
21 45. Connelly JB: **Evaluating complex public health interventions: theory,**  
22 **methods and scope of realist enquiry.** *Journal of evaluation in clinical practice*  
23 2007, 13:935-41.  
24  
25 46. Bennett S, Paina L, Kim C, Agyepong I, Chunharas S: **What must be done to**  
26 **enhance capacity for Health Systems Research?** In *Background Papers for the*  
27 *First Global Symposium on Health Systems Research.* Montreux, Switzerland: WHO;  
28 2010:30.  
29  
30 47. Jimba M, Cometto G, Yamamoto T, et al.: **Health workforce: the critical**  
31 **pathway to universal health coverage.** In *Background paper for the global*  
32 *symposium on health systems research.* Montreux, Switzerland: WHO; 2010:46.  
33  
34 48. Berwick DM: **The science of improvement.** *JAMA: the journal of the*  
35 *American Medical Association* 2008, 299:1182-4.  
36  
37 49. Pawson R, Sridharan S: **Theory-driven evaluation of public health**  
38 **programmes.** In *Evidence-based public health: Effectiveness and Efficiency.* edited  
39 by Killoran A, Kelly MP Oxford Scholarship Online Monographs; 2009:43-63.  
40  
41  
42  
43  
44  
45  
46  
47  
48  
49  
50  
51  
52  
53  
54  
55  
56  
57  
58  
59  
60

## Figures

### Figure 1

**Short title:** Map of India showing Karnataka (shaded red) in south India

**Legend:** Map from Wikimedia Commons/User:Nichalp licensed under Creative Commons Attribution-Share Alike 3.0

### Figure 2

**Short title:** Map of Karnataka showing Tumkur district(shaded blue) and Raichur district (shaded green)

**Legend:** Map from Wikimedia Commons/User:Planemad licensed under Creative Commons Attribution-Share Alike 3.0

### Figure 3

**Short title:** Schematic showing the structure of the capacity-building intervention in Tumkur along with key actors and timeline

### Figure 4

**Short title:** Study design showing steps A to F

### Figure 5

**Short title:** Six steps proposed by Van Belle et al [21]

**Figure 6**

**Short title:** Hypothetical pathways to change based on initial reconstruction of programme theory and literature

**Figure 7**

**Short title:** Theories of behavioural change in health services in relation to their sphere of influence

**Supplementary files****Supplementary file 1**

File format: questionnaire\_final.pdf

Title: Questionnaire for health managers on training programmes, planning and supervision

Description: The questionnaire measures attitudes to training programmes, organisational commitment, self-efficacy and nature of supervision of health managers

**Supplementary file 2**

File format: ssi\_guide.pdf

Title: semi-structured interview guide

Description: An interview guide with probes to understand process of planning and attitudes towards planning

**Supplementary file 3**

File format: consent\_eng.pdf

1  
2  
3 Title: Consent form (English)  
4

5 Description: A blank consent form (English) used to obtain consent for interviews  
6  
7

8  
9  
10 **Supplementary file 4**

11 File format: consent\_kan.pdf

12  
13 Title: Consent form (Kannada)

14  
15 Description: A blank consent form in the Kannada (local language) used to obtain  
16 consent for interviews  
17  
18

19  
20  
21  
22 **Supplementary file 5**

23 File format: epidata\_val.pdf

24  
25 Title: epidata checks

26  
27 Description: epidata format showing the validity and checks for data entry  
28  
29  
30  
31  
32  
33  
34  
35  
36  
37  
38  
39  
40  
41  
42  
43  
44  
45  
46  
47  
48  
49  
50  
51  
52  
53  
54  
55  
56  
57  
58  
59  
60

1  
2  
3  
4  
5  
6  
7  
8  
9  
10  
11  
12  
13  
14  
15  
16  
17  
18  
19  
20  
21  
22  
23  
24  
25  
26  
27  
28  
29  
30  
31  
32  
33  
34  
35  
36  
37  
38  
39  
40  
41  
42  
43  
44  
45  
46  
47  
48  
49  
50  
51  
52  
53  
54  
55  
56  
57  
58  
59  
60

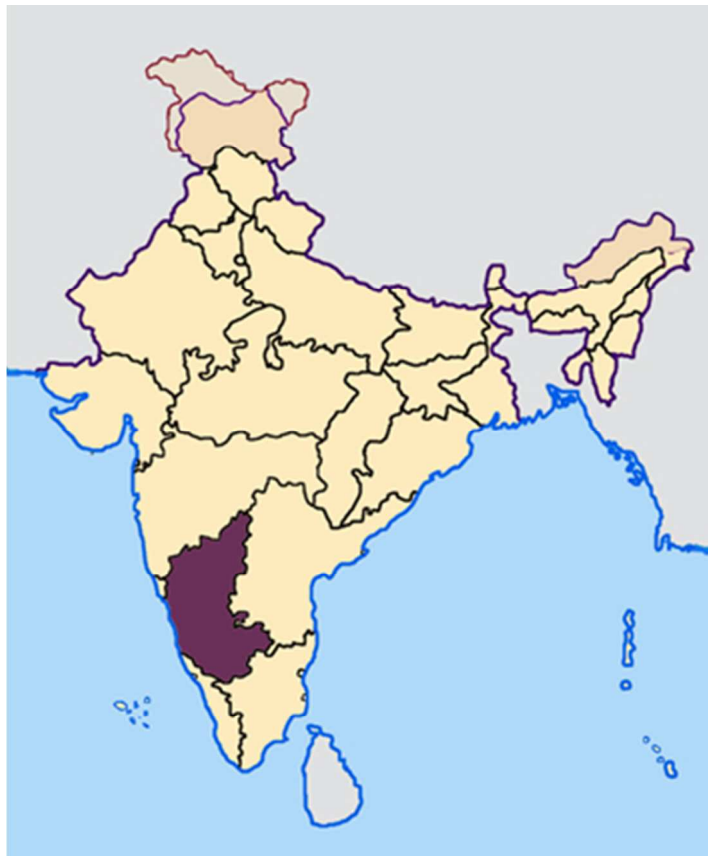

Map of India showing Karnataka (shaded red) in south India. (Map from Wikimedia Commons/User:Nichalp licensed under Creative Commons Attribution-Share Alike 3.0) 123x150mm (72 x 72 DPI)

For peer review only

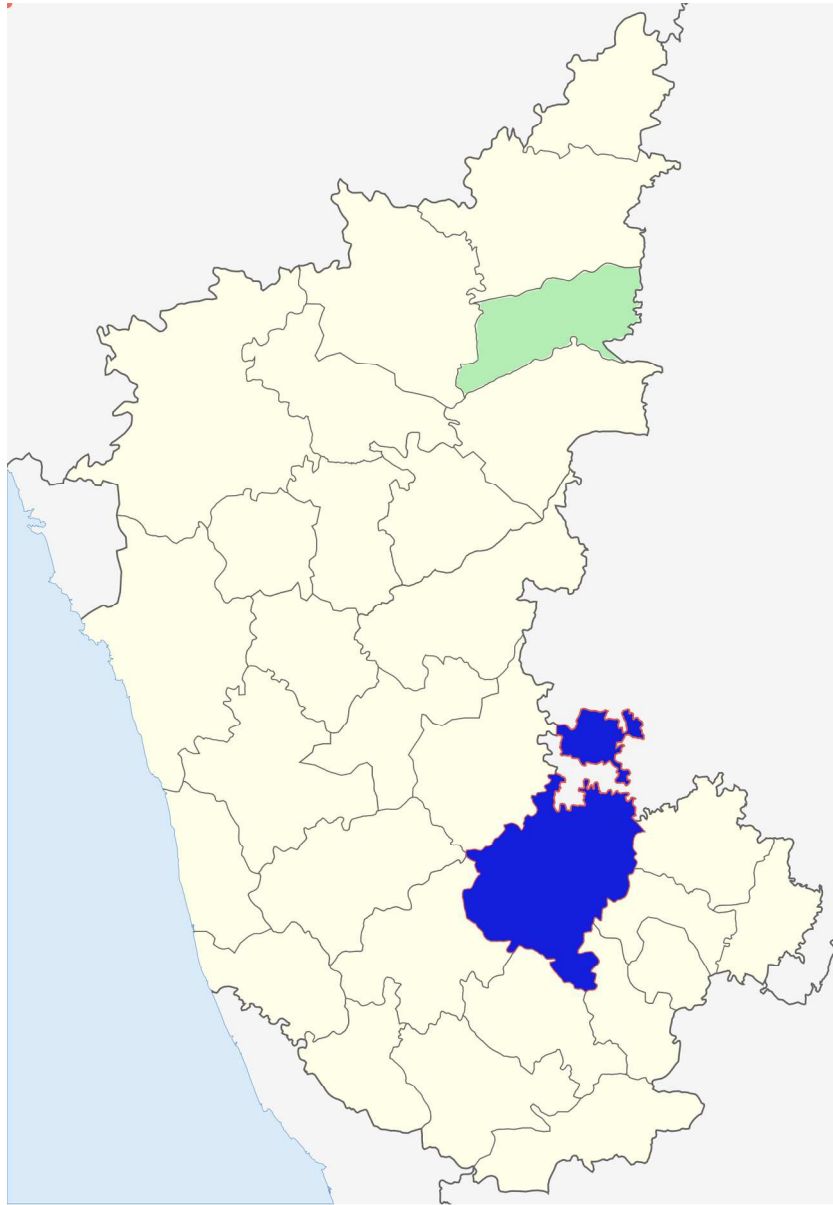

Map of Karnataka showing Tumkur district(shaded blue) and Raichur district (shaded green). (Map from Wikimedia Commons/User:Planemad licensed under Creative Commons Attribution-Share Alike 3.0)

575x831mm (72 x 72 DPI)

Structure of the intervention in Tumkur with key actors, relationships and timeline

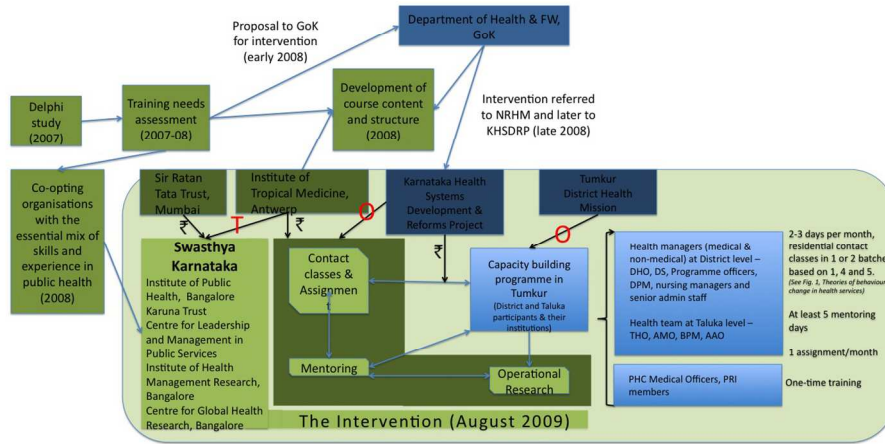

Institute of Public Health, Bangalore

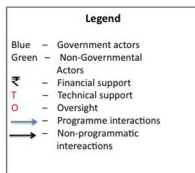

Schematic showing the structure of the capacity-building intervention in Tumkur along with key actors and timeline

535x391mm (72 x 72 DPI)



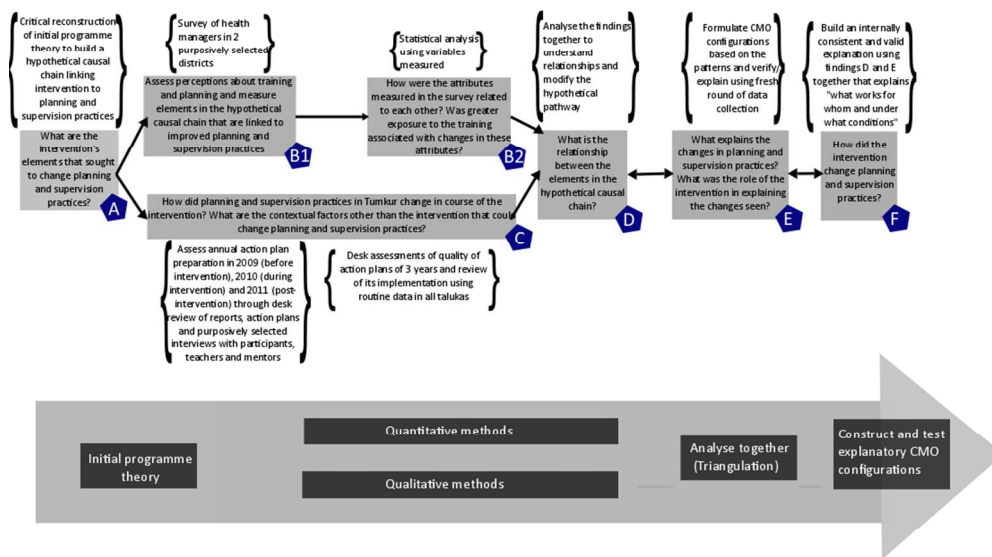

Study design showing steps A to F  
393x262mm (72 x 72 DPI)

Review only

1  
2  
3  
4  
5  
6  
7  
8  
9  
10  
11  
12  
13  
14  
15  
16  
17  
18  
19  
20  
21  
22  
23  
24  
25  
26  
27  
28  
29  
30  
31  
32  
33  
34  
35  
36  
37  
38  
39  
40  
41  
42  
43  
44  
45  
46  
47  
48  
49  
50  
51  
52  
53  
54  
55  
56  
57  
58  
59  
60

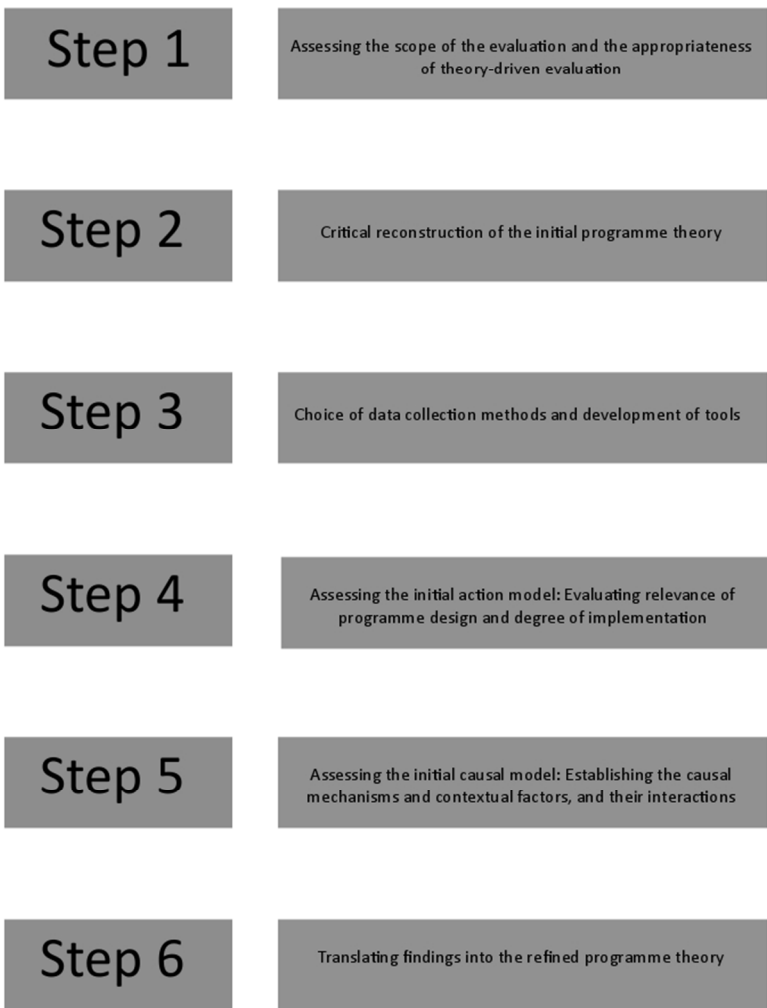

Six steps proposed by Van Belle et al [21]  
262x371mm (72 x 72 DPI)

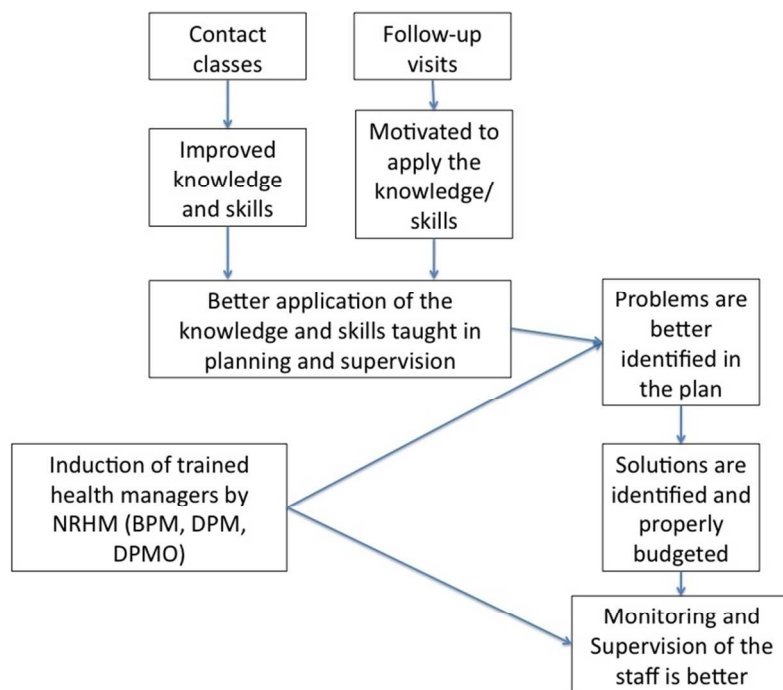

Hypothetical pathways to change based on initial reconstruction of programme theory and literature  
355x266mm (72 x 72 DPI)

Review only

1  
2  
3  
4  
5  
6  
7  
8  
9  
10  
11  
12  
13  
14  
15  
16  
17  
18  
19  
20  
21  
22  
23  
24  
25  
26  
27  
28  
29  
30  
31  
32  
33  
34  
35  
36  
37  
38  
39  
40  
41  
42  
43  
44  
45  
46  
47  
48  
49  
50  
51  
52  
53  
54  
55  
56  
57  
58  
59  
60

Theories of behavioural change in health services

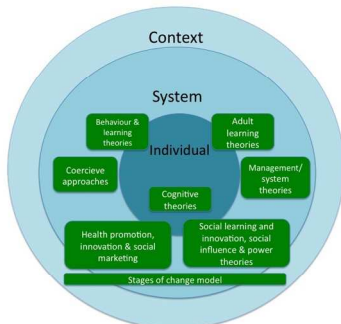

Theories in relation to sphere of influence  
Individual, System and context

| Theory                                                                       | Assumptions                                                                                                                                                                                        | Interventions based on theory                                                                                                                                                                                                                                                                                   |
|------------------------------------------------------------------------------|----------------------------------------------------------------------------------------------------------------------------------------------------------------------------------------------------|-----------------------------------------------------------------------------------------------------------------------------------------------------------------------------------------------------------------------------------------------------------------------------------------------------------------|
| Adult Learning theories                                                      | Change occurs when individuals have personal experience with a problem and helped develop the solution                                                                                             | Develop guidelines through local consensus, small-group interactive learning, problem-based learning                                                                                                                                                                                                            |
| Health promotion, innovation and social marketing theories                   | Behaviours can be changed with clear and attractive products and messages that meet a need of the target audience                                                                                  | Needs assessments, adapting change proposals to meet local needs, creating clear and attractive messages, and disseminating them via multiple channels                                                                                                                                                          |
| Behavioural and learning theories                                            | Behaviours are a result of external stimuli                                                                                                                                                        | Audit and feedback, reminders, incentives, sanctions, removing factors that are demoralising                                                                                                                                                                                                                    |
| Social learning and innovation theories, social influence and power theories | Change occurs through the interaction and influence of important people, and through development of new social norms                                                                               | Use opinion leaders or respected peers to disseminate guidelines, pressure from patients to use an innovation                                                                                                                                                                                                   |
| Management theories, system theories                                         | Errors can be prevented by improving the design of health systems and processes                                                                                                                    | Total quality management, total quality improvement approaches, changing structures and tasks                                                                                                                                                                                                                   |
| Coercive approaches                                                          | Change occurs because of pressure and control                                                                                                                                                      | Laws and regulations, licensing, budgeting, complaints procedures, and legal pursuits                                                                                                                                                                                                                           |
| Stages of change model, and the PRECEDE model                                | To change, individuals pass through stages (precontemplation, contemplation of change, preparation for change, action, and maintenance) and different interventions are needed at different stages | Predisposing strategies, to progress from precontemplation to contemplation (education activities, conferences); enabling strategies, to progress from contemplation to action (clinical guidelines); and reinforcing strategies, to progress from preparation to maintenance (audit and feedback, peer review) |

Adapted from Rowe *et al.* 2005. How can we achieve and maintain high-quality performance of health workers in low-resource settings? *The Lancet*. 366(9490): 1026-1035.

Institute of Public Health, Bangalore 2010

Theories of behavioural change in health services in relation to their sphere of influence  
649x449mm (72 x 72 DPI)

view only

(In English)

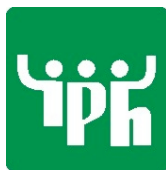

## Institute of Public Health

#250, Masters Cottage, 2<sup>nd</sup> C Main, 2<sup>nd</sup> C Cross, Girinagar I Phase, Bangalore – 560 045  
[www.iphindia.org](http://www.iphindia.org) Phone: +91 [REDACTED]

### Information sheet

**Background:** Institute of Public Health, Bangalore is a non-profit public health institute in Bangalore involved in training, research, consultancy and advocacy. The Institute has recently begun a training programme for the district and taluka health team in Tumkur.

**About the study:** The Institute is undertaking a study in your district to understand the process of planning, specifically the NRHM Programme Implementation Plan for 2010. The study will involve interviews and focus group discussions with people in the health department at district, taluka, PHC and village level. The study will also involve interviews with non-health personnel in the district who have been involved in making the NRHM PIP. In addition, policy makers within the state as well as national level will be interviewed.

**Why the study?** The study is being undertaken to understand the operational problems that happen in implementing the process of NRHM PIP as per the guidelines. We also hope to understand the problems that people face in the field and inform policy makers about it.

**Anonymity and confidentiality** of all views and opinions expressed during the interviews is guaranteed. The aim of the study is not to find fault with the process in your district, but to understand and document issues and problems with the process of PIP preparation itself, and on trying to find out how this can be improved. All original recordings of the interviews shall be destroyed after transcription and interviewees shall not be identified in any report or publication.

**Audio recording** will be done to help in capturing all the views and opinions expressed. The audio will be destroyed after transcribing. Complete anonymity and confidentiality of the individuals is guaranteed.

**Outcome:** The study findings will be used to inform policy-makers about the operational issues in PIP preparation. The findings will also help streamline and improve the process in the coming years. In addition, the findings will be used to inform training programmes and workshops for district health personnel in other district training programmes. A brief of the findings will be shared with you after the study.

For further information, please contact: Dr. Prashanth NS, PhD Fellow, Institute of Public Health, Bangalore. Phone: [REDACTED]

### Informed Consent

I have read and understood the details provided to me about the study through the information sheet above. I hereby consent to participate in the study with the understanding that my views and opinions shall be treated as anonymous.

I also agree to record my opinions. Yes/No.

Signature:

Date:

(In Kannada)

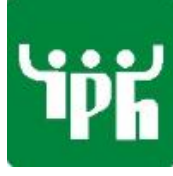

## Institute of Public Health

#250, Masters Cottage, 2<sup>nd</sup> C Main, 2<sup>nd</sup> C Cross, Girinagar I Phase, Bangalore – 560 045

[www.iphindia.org](http://www.iphindia.org) Phone: +91

### ಮಾಹಿತಿ ಚೀಟಿ

ಹಿನ್ನೆಲೆ : ಇನ್ಸ್ಟಿಟ್ಯೂಟ್ ಆಫ್ ಪಬ್ಲಿಕ್ ಹೆಲ್ತ್, ಬೆಂಗಳೂರು ಒಂದು ಸಮುದಾಯ ಆರೋಗ್ಯದ ಬಗ್ಗೆ ತರಬೇತಿ, ಸಂಶೋಧನೆ ಹಾಗೂ ಸಮಾಲೋಚನೆಯಲ್ಲಿ ತೊಡಗಿರುವ ಸಂಸ್ಥೆ. ಈ ಸಂಸ್ಥೆ ತುಮಕೂರಿನಲ್ಲಿ ಜಿಲ್ಲಾ ಹಾಗೂ ತಾಲೂಕು ಆರೋಗ್ಯ ಸಂಸ್ಥೆಗಳಲ್ಲಿ ಸೇವೆ ಸಲ್ಲಿಸುತ್ತಿರುವ ಸಿಬ್ಬಂದಿಗೆ ತರಬೇತಿ ನೀಡುತ್ತಿದೆ.

ಸಂಶೋಧನೆ : ನಮ್ಮ ಸಂಸ್ಥೆಯು ನಿಮ್ಮ ಜಿಲ್ಲೆಯಲ್ಲಿ ನಕಾಶೆ ಮಾಡುವುದರ ಬಗ್ಗೆ ಅದರಲ್ಲೂ ರಾಷ್ಟ್ರೀಯ ಗ್ರಾಮೀಣ ಆರೋಗ್ಯ ಅಭಿಯಾನದ ಅಡಿಯಲ್ಲಿ ೨೦೧೦ ವರ್ಷದ ಪಿ ಐ ಪಿ ಯಾವ ರೀತಿ ಮಾಡಲಾಯಿತು ಎಂಬುದರ ಬಗ್ಗೆ ತಿಳಿಯಲು ಒಂದು ಸಂಶೋಧನೆ ನಡೆಸುತ್ತಿದೆ. ಈ ಸಂಶೋಧನೆ ಪಿ ಐ ಪಿ ಮಾಡುವುದರಲ್ಲಿ ನಿಮ್ಮಲ್ಲಿ ಯಾವ ರೀತಿ ತೊಂದರೆ ಹಾಗೂ ಅಡಚಣೆಗಳು ಬರುತ್ತವೆ ಎಂದು ತಿಳಿಯಲು ಮಾಡುತ್ತಿದ್ದೇವೆ. ಸಂಶೋಧನೆಯಲ್ಲಿ ತಪ್ಪು ಕಂಡುಹಿಡಿಯುವುದಾಗಲಿ, ಅಥವಾ ಕೊರತೆಗಳು ಕಂಡುಹಿಡಿಯುವುದಕ್ಕಾಗಲಿ ಮಾಡುತ್ತಿಲ್ಲ. ನಾವು ಈ ಕುರಿತು ಜಿಲ್ಲಾ ತಾಲೂಕು ಪಿ ಎಚ್ ಸಿ ಹಾಗೂ ಹಳ್ಳಿಗಳ ಮಟ್ಟದಲ್ಲಿ ಆರೋಗ್ಯ ಸೇವೆಗಳ ಸಿಬ್ಬಂದಿಯೊಂದಿಗೆ ಸಂದರ್ಶನ ನಡೆಸುತ್ತೇವೆ. ಜೊತೆಗೆ, ಜಿಲ್ಲಾ ಮಟ್ಟದಲ್ಲಿ ಪಿ ಐ ಪಿ ಯಲ್ಲಿ ತೊಡಗಿದ ಅಧಿಕಾರಿಗಳೊಂದಿಗೂ ಸಂದರ್ಶನ ಮಾಡುತ್ತೇವೆ. ನಂತರ, ರಾಷ್ಟ್ರ ಮಟ್ಟದಲ್ಲಿ ಹಾಗೂ ಕೇಂದ್ರ ಸರ್ಕಾರದ ಮಟ್ಟದಲ್ಲಿ ಏನ್.ಆರ್.ಎಚ್.ಎಂ ಅಧಿಕಾರಿಗಳೊಂದಿಗೂ ಸಂದರ್ಶಿಸುತ್ತೇವೆ.

ಏಕೆ : ಪಿ.ಐ.ಪಿ ಮಾಡುವುದರಲ್ಲಿ ಹಲವಾರು ತೊಂದರೆಗಳು ಮತ್ತು ಅಡಚಣೆಗಳು ಕಂಡುಬರುತ್ತವೆ. ಆದರೆ ಪ್ರತಿ ವರ್ಷ ಪಿ.ಐ.ಪಿ ಇಡೀ ದೇಶದಲ್ಲಿ ಒಂದೇ ರೀತಿಯಲ್ಲಿ ಮಾಡಲಾಗುತ್ತದೆ. ಈ ಸಂಶೋಧನೆಯ ಮುಖಾಂತರ ನಾವು ಜಿಲ್ಲಾ ತಾಲೂಕು ಹಾಗೂ ಕೆಳ ಮಟ್ಟದಲ್ಲಿ ಆಗುವ ತೊಂದರೆಗಳನ್ನು ಅರಿತು, ಇವನ್ನು ನಿವಾರಿಸುವುದಕ್ಕೆ ಯಾವ ಕ್ರಮ ಕೈಗೊಳ್ಳಬೇಕೆಂದು ಮೇಲಿನ ಅಧಿಕಾರಿಗಳ ಮುಂದೆ ಇಡುತ್ತೇವೆ.

ಅನಾಮಧೇಯತೆ ಹಾಗೂ ಗೌಪ್ಯತೆ : ಸಂದರ್ಶನದಲ್ಲಿ ವ್ಯಕ್ತಿ ಪಡಿಸಿರುವ ಎಲ್ಲಾ ಅಭಿಪ್ರಾಯಗಳ ಗೌಪ್ಯತೆ ಕಾಪಾಡಲಾಗುವುದು. ಹಾಗೂ ಎಲ್ಲಾ ಅಭಿಪ್ರಾಯಗಳು ಅನಾಮಧೇಯವಾಗಿ ಅಧ್ಯಯಿಸಲಾಗುವುದು. ಮೂದಲೇ ತಿಳಿಸಿರುವಂತೆ ಈ ಸಂದರ್ಶನ ಪಿ.ಐ.ಪಿ ಯಲ್ಲಿ ಆಗುವ ಅಡಚಣೆಗಳು ಹಾಗೂ ತೊಂದರೆಗಳನ್ನು ಅರ್ಥ ಮಾಡಿಕೊಂಡು ನಿವಾರಿಸಲು ಮಾಡಲಾಗುತ್ತಿದೆ; ತಪ್ಪು ಕಂಡುಹಿಡಿಯುವುದಕ್ಕಲ್ಲ. ನಿಮ್ಮ ಅಭಿಪ್ರಾಯಗಳನ್ನು ನಿಮ್ಮ ಹೆಸರಿನಿಂದ ಯಾವುದೇ ರೀತಿಯಲ್ಲಿ ಗುರುತಿಸುವಂತೆ ಹೊರಪಡಿಸಲಾಗುವುದಿಲ್ಲ.

ಧ್ವನಿ ಮುದ್ರಣ: ನಿಮ್ಮ ಉತ್ತರ ಹಾಗೂ ಅಭಿಪ್ರಾಯಗಳನ್ನು ಧ್ವನಿ ಮುದ್ರಣ ಯಂತ್ರದ ಮೂಲಕ ಉಲ್ಲೇಖಿಸಲಾಗುವುದು. ಈ ರೀತಿ ತೆಗೆದುಕೊಂಡಿರುವ ಧ್ವನಿ ಮುದ್ರಣವನ್ನು ಅಧ್ಯಯನದ ನಂತರ ಅಳಿಸಲಾಗುವುದು.

ಪರಿಣಾಮ: ಈ ಅಧ್ಯಯನದ ಪರಿಣಾಮವನ್ನು ಮೇಲಿನ ಅಧಿಕಾರಿಗಳಿಗೆ ಜಿಲ್ಲಾ ತಾಲೂಕು ಹಾಗೂ ಹಳ್ಳಿಗಳ ಮಟ್ಟದಲ್ಲಿ ಪಿ.ಐ.ಪಿ ಮಾಡುವುದರಲ್ಲಿ ಯಾವ ರೀತಿಯ ತೊಂದರೆಗಳು ಹಾಗೂ ಅಡಚಣೆಗಳು ಉಂಟಾಗುತ್ತವೆ ಎಂದು ಮತ್ತು ಯಾವ ರೀತಿಯ ಬದಲಾವಣೆಗಳನ್ನು ತರಬೇಕು ಎಂಬುದರ ಬಗ್ಗೆ ತಿಳಿಸಲು ಉಪಯೋಗಿಸಲಾಗುವುದು. ಅದರೊಂದಿಗೆ ಜಿಲ್ಲಾ ಮಟ್ಟದ ಅಧಿಕಾರಿಗಳ ತರಬೇತಿಯಲ್ಲೂ ಉಪಯೋಗಿಸಲಾಗುವುದು. ಪರಿಣಾಮಗಳ ಪಟ್ಟಿನೋಟವನ್ನು ನಿಮಗೆ ಕೊಡಲಾಗುವುದು. ಹೆಚ್ಚು ಮಾಹಿತಿಗಾಗಿ, ಇವರನ್ನು ಸಂಪರ್ಕಿಸಿ: ಡಾ|| ಪ್ರಶಾಂತ್ ಏನ್.ಎಸ್. ಪಿ.ಎಚ್.ಡಿ ವಿದ್ಯಾರ್ಥಿ ಇನ್ಸ್ಟಿಟ್ಯೂಟ್ ಆಫ್ ಪಬ್ಲಿಕ್ ಹೆಲ್ತ್, ಬೆಂಗಳೂರು - ೫೬೦೦೪೫. ದೂ: ೯೪೪೯೫ ೯೯೫೬೬. ಈ ಮೈಲೆ:

ನಾನು ಮೇಲಿರುವ ವಿಚಾರವನ್ನು ಓದಿ ತಿಳಿದು, ಈ ಸಂಶೋಧನೆಗೆ ಸಂದರ್ಶನ ನೀಡಲು ಒಪ್ಪಿದ್ದೇನೆ. ನಾನು ಹೇಳುವ ಮಾತುಗೆ ಗೌಪ್ಯತೆಯನ್ನು ಕಾಪಡಲಾಗುತ್ತದೆಂದು ತಿಳಿಸಲಾಗಿದೆ. ನನ್ನ ಮಾತುಗಳ ಧ್ವನಿಮುದ್ರಣಕ್ಕೆ ಒಪ್ಪಿದ್ದೇನೆ. ಹೆಸರು/ಇಲ್ಲ

ಸಹಿ:  
ದಿನಾಂಕ:

File size: 11 kb  
 Last revision: 20. Oct 2011 4:57 PM  
 Number of fields: 130  
 Number of records: 0  
 Checks applied: Yes (Last revision 20. Oct 2011 6:20 PM)

Fields in data file:

| No | Name | Variable label                    | Field type | Width | Checks                       | Value labels                                                                                          |
|----|------|-----------------------------------|------------|-------|------------------------------|-------------------------------------------------------------------------------------------------------|
| 1  | id   | automatic id number               | ID number  | 5     |                              |                                                                                                       |
| 2  | a1   | respondent number                 | Number     | 3     | Must enter<br>Legal: 100-300 |                                                                                                       |
| 3  | a2   | interviewer name                  | Number     | 1     | Must enter<br>Legal: 0-11    | interview<br>1: Pra<br>2: Kur<br>3: Bhee<br>4: Mah<br>5: Other                                        |
| 4  | a3   | date                              | Date (dmy) | 10    | Must enter                   |                                                                                                       |
| 5  | a4   | time taken(in minutes)            | Number     | 2     | Must enter<br>Legal: 0-90    |                                                                                                       |
| 6  | a5   | person doing data entry           | Number     | 1     | Must enter<br>Legal: 0-3     | dataentry<br>1: Srinivas<br>2: Other                                                                  |
| 7  | a6   | data checked                      | Number     | 1     | Must enter<br>Legal: 0-2     | yesno<br>0: Blank<br>1: Yes<br>2: No                                                                  |
| 8  | b1   | The purpose of the NRHM PIP       | Number     | 1     | Must enter<br>Legal: 0-4     |                                                                                                       |
| 9  | b2   | If I were in charge of NRHM       | Number     | 1     | Must enter<br>Legal: 0-5     |                                                                                                       |
| 10 | b3   | At the PHC level                  | Number     | 1     | Must enter<br>Legal: 0-4     |                                                                                                       |
| 11 | b4   | At the taluka level               | Number     | 1     | Must enter<br>Legal: 0-5     |                                                                                                       |
| 12 | b5   | Which statement best summarises   | Number     | 1     | Must enter<br>Legal: 0-6     |                                                                                                       |
| 13 | b6   | For every PIP                     | Number     | 1     | Must enter<br>Legal: 0-5     | likert<br>0: Blank<br>1: Strongly a<br>2: Agree<br>3: Neither a nor d<br>4: Disagree<br>5: Strongly d |
| 14 | b7   | PIPs can be used to bring about   | Number     | 1     | Must enter<br>Legal: 0-5     | likert<br>0: Blank<br>1: Strongly a<br>2: Agree<br>3: Neither a nor d<br>4: Disagree<br>5: Strongly d |
| 15 | b8   | Districts need technical guidance | Number     | 1     | Must enter<br>Legal: 0-5     | likert<br>0: Blank<br>1: Strongly a<br>2: Agree<br>3: Neither a nor d<br>4: Disagree<br>5: Strongly d |
| 16 | b9   | Talukas need                      | Number     | 1     | Must enter                   | likert                                                                                                |









|    |     |                                         |        |    |                                                          |                                                                                                                                                                                                                                                               |
|----|-----|-----------------------------------------|--------|----|----------------------------------------------------------|---------------------------------------------------------------------------------------------------------------------------------------------------------------------------------------------------------------------------------------------------------------|
| 49 | d4  | I am confident that                     | Number | 3  | Must enter<br>Legal: 0,01,10,20,30,40,50,60,70,80,90,100 |                                                                                                                                                                                                                                                               |
| 1  |     |                                         |        |    |                                                          |                                                                                                                                                                                                                                                               |
| 2  |     |                                         |        |    |                                                          |                                                                                                                                                                                                                                                               |
| 3  |     |                                         |        |    |                                                          |                                                                                                                                                                                                                                                               |
| 50 | d5  | Thanks to my strategic                  | Number | 3  | Must enter<br>Legal: 0,01,10,20,30,40,50,60,70,80,90,100 |                                                                                                                                                                                                                                                               |
| 4  |     |                                         |        |    |                                                          |                                                                                                                                                                                                                                                               |
| 5  |     |                                         |        |    |                                                          |                                                                                                                                                                                                                                                               |
| 6  |     |                                         |        |    |                                                          |                                                                                                                                                                                                                                                               |
| 7  |     |                                         |        |    |                                                          |                                                                                                                                                                                                                                                               |
| 51 | d6  | I can solve most                        | Number | 3  | Must enter<br>Legal: 0,01,10,20,30,40,50,60,70,80,90,100 |                                                                                                                                                                                                                                                               |
| 8  |     |                                         |        |    |                                                          |                                                                                                                                                                                                                                                               |
| 9  |     |                                         |        |    |                                                          |                                                                                                                                                                                                                                                               |
| 10 |     |                                         |        |    |                                                          |                                                                                                                                                                                                                                                               |
| 11 |     |                                         |        |    |                                                          |                                                                                                                                                                                                                                                               |
| 52 | d7  | I can remain calm                       | Number | 3  | Must enter<br>Legal: 0,01,10,20,30,40,50,60,70,80,90,100 |                                                                                                                                                                                                                                                               |
| 12 |     |                                         |        |    |                                                          |                                                                                                                                                                                                                                                               |
| 13 |     |                                         |        |    |                                                          |                                                                                                                                                                                                                                                               |
| 14 |     |                                         |        |    |                                                          |                                                                                                                                                                                                                                                               |
| 15 |     |                                         |        |    |                                                          |                                                                                                                                                                                                                                                               |
| 53 | d8  | When I am confronted                    | Number | 3  | Must enter<br>Legal: 0,01,10,20,30,40,50,60,70,80,90,100 |                                                                                                                                                                                                                                                               |
| 16 |     |                                         |        |    |                                                          |                                                                                                                                                                                                                                                               |
| 17 |     |                                         |        |    |                                                          |                                                                                                                                                                                                                                                               |
| 18 |     |                                         |        |    |                                                          |                                                                                                                                                                                                                                                               |
| 19 |     |                                         |        |    |                                                          |                                                                                                                                                                                                                                                               |
| 20 | d9  | If I am in trouble                      | Number | 3  | Must enter<br>Legal: 0,01,10,20,30,40,50,60,70,80,90,100 |                                                                                                                                                                                                                                                               |
| 21 |     |                                         |        |    |                                                          |                                                                                                                                                                                                                                                               |
| 22 |     |                                         |        |    |                                                          |                                                                                                                                                                                                                                                               |
| 23 |     |                                         |        |    |                                                          |                                                                                                                                                                                                                                                               |
| 24 | d10 | No matter what                          | Number | 3  | Must enter<br>Legal: 0,01,10,20,30,40,50,60,70,80,90,100 |                                                                                                                                                                                                                                                               |
| 25 |     |                                         |        |    |                                                          |                                                                                                                                                                                                                                                               |
| 26 |     |                                         |        |    |                                                          |                                                                                                                                                                                                                                                               |
| 27 |     |                                         |        |    |                                                          |                                                                                                                                                                                                                                                               |
| 28 | e1  | district                                | Number | 1  | Must enter<br>Legal: 0-2                                 |                                                                                                                                                                                                                                                               |
| 29 |     |                                         |        |    |                                                          |                                                                                                                                                                                                                                                               |
| 30 | e2  | taluka                                  | Number | 3  | Must enter<br>Legal: 0-16                                | taluka<br>0: Blank<br>1: Tumkur<br>2: Gubbi<br>3: Tiptur<br>4: Turuvekere<br>5: CNhalli<br>6: Kunigal<br>7: Madhugiri<br>8: Pavagada<br>9: Koratagere<br>10: Sira<br>11: Raichur<br>12: Sindhanur<br>13: Manvi<br>14: Lingsugur<br>15: Devadurga<br>16: Other |
| 31 |     |                                         |        |    |                                                          |                                                                                                                                                                                                                                                               |
| 32 |     |                                         |        |    |                                                          |                                                                                                                                                                                                                                                               |
| 33 |     |                                         |        |    |                                                          |                                                                                                                                                                                                                                                               |
| 34 |     |                                         |        |    |                                                          |                                                                                                                                                                                                                                                               |
| 35 |     |                                         |        |    |                                                          |                                                                                                                                                                                                                                                               |
| 36 |     |                                         |        |    |                                                          |                                                                                                                                                                                                                                                               |
| 37 |     |                                         |        |    |                                                          |                                                                                                                                                                                                                                                               |
| 38 |     |                                         |        |    |                                                          |                                                                                                                                                                                                                                                               |
| 39 |     |                                         |        |    |                                                          |                                                                                                                                                                                                                                                               |
| 40 |     |                                         |        |    |                                                          |                                                                                                                                                                                                                                                               |
| 41 |     |                                         |        |    |                                                          |                                                                                                                                                                                                                                                               |
| 42 |     |                                         |        |    |                                                          |                                                                                                                                                                                                                                                               |
| 43 |     |                                         |        |    |                                                          |                                                                                                                                                                                                                                                               |
| 44 |     |                                         |        |    |                                                          |                                                                                                                                                                                                                                                               |
| 45 |     |                                         |        |    |                                                          |                                                                                                                                                                                                                                                               |
| 46 | e3  | primary designation                     | Text   | 34 | Must enter                                               |                                                                                                                                                                                                                                                               |
| 47 |     |                                         |        |    |                                                          |                                                                                                                                                                                                                                                               |
| 48 |     |                                         |        |    |                                                          |                                                                                                                                                                                                                                                               |
| 49 | e4  | How long have you (in years)            | Number | 2  | Must enter<br>Legal: 0-35                                |                                                                                                                                                                                                                                                               |
| 50 |     |                                         |        |    |                                                          |                                                                                                                                                                                                                                                               |
| 51 | e51 | concepts in public health               | Number | 1  | Must enter<br>Legal: 0,1                                 | checkbox<br>0: Blank or no tick<br>1: Ticked                                                                                                                                                                                                                  |
| 52 |     |                                         |        |    |                                                          |                                                                                                                                                                                                                                                               |
| 53 |     |                                         |        |    |                                                          |                                                                                                                                                                                                                                                               |
| 54 | e52 | leadership                              | Number | 1  | Must enter<br>Legal: 0,1                                 | checkbox<br>0: Blank or no tick<br>1: Ticked                                                                                                                                                                                                                  |
| 55 |     |                                         |        |    |                                                          |                                                                                                                                                                                                                                                               |
| 56 |     |                                         |        |    |                                                          |                                                                                                                                                                                                                                                               |
| 57 |     |                                         |        |    |                                                          |                                                                                                                                                                                                                                                               |
| 58 | e53 | planning                                | Number | 1  | Must enter<br>Legal: 0,1                                 | checkbox<br>0: Blank or no tick<br>1: Ticked                                                                                                                                                                                                                  |
| 59 |     |                                         |        |    |                                                          |                                                                                                                                                                                                                                                               |
| 60 |     |                                         |        |    |                                                          |                                                                                                                                                                                                                                                               |
| 63 | e54 | human resources planning and motivation | Number | 1  | Must enter<br>Legal: 0,1                                 | checkbox<br>0: Blank or no tick<br>1: Ticked                                                                                                                                                                                                                  |

| QID    | Question                       | Type   | Value | Legal                     | Control                                     |
|--------|--------------------------------|--------|-------|---------------------------|---------------------------------------------|
| 64 e55 | administrative procedures      | Number | 1     | Must enter<br>Legal: 0,1  | tickbox<br>0: Blank or no tick<br>1: Ticked |
| 65 e56 | health and hospital management | Number | 1     | Must enter<br>Legal: 0,1  | tickbox<br>0: Blank or no tick<br>1: Ticked |
| 66 e57 | HMIS                           | Number | 1     | Must enter<br>Legal: 0,1  | tickbox<br>0: Blank or no tick<br>1: Ticked |
| 67 e58 | health and hospital management | Number | 1     | Must enter<br>Legal: 0,1  | tickbox<br>0: Blank or no tick<br>1: Ticked |
| 68 e59 | financial and medicolegal      | Number | 1     | Must enter<br>Legal: 0,1  | tickbox<br>0: Blank or no tick<br>1: Ticked |
| 69 e60 | teamwork                       | Number | 1     | Must enter<br>Legal: 0,1  | tickbox<br>0: Blank or no tick<br>1: Ticked |
| 70 e61 | emergency obstetric care       | Number | 1     | Must enter<br>Legal: 0,1  | tickbox<br>0: Blank or no tick<br>1: Ticked |
| 71 e62 | role of PRI                    | Number | 1     | Must enter<br>Legal: 0,1  | tickbox<br>0: Blank or no tick<br>1: Ticked |
| 72 e63 | nrhm pip                       | Number | 1     | Must enter<br>Legal: 0,1  | tickbox<br>0: Blank or no tick<br>1: Ticked |
| 73 e64 | supportive supervision         | Number | 1     | Must enter<br>Legal: 0,1  | tickbox<br>0: Blank or no tick<br>1: Ticked |
| 74 e65 | quality in health care         | Number | 1     | Must enter<br>Legal: 0,1  | tickbox<br>0: Blank or no tick<br>1: Ticked |
| 75 e66 | other topic not listed         | Number | 1     | Must enter<br>Legal: 0,1  | tickbox<br>0: Blank or no tick<br>1: Ticked |
| 76 e6  | have you attended the          | Number | 1     | Must enter<br>Legal: 0-3  |                                             |
| 77 e7  | if yes which components        | Number | 1     | Must enter<br>Legal: 0-4  |                                             |
| 78 e8  | in the swasthya karnataka      | Number | 1     | Must enter<br>Legal: 0-12 |                                             |
| 79 e9  | have you been visited          | Number | 1     | Must enter<br>Legal: 0-3  |                                             |
| 80 e10 | if yes how many times          | Number | 2     | Must enter<br>Legal: 0-50 |                                             |
| 81 f1  | the content of the classroom   | Number | 1     | Must enter<br>Legal: 0-6  |                                             |
| 82 f2  | after attending the classes    | Number | 1     | Must enter<br>Legal: 0-6  |                                             |
| 83 f3  | after the classes, I can       | Number | 1     | Must enter<br>Legal: 0-6  |                                             |
| 84 f4  | the visits ...skills           | Number | 1     | Must enter<br>Legal: 0-6  |                                             |
| 85 f5  | the visits ...implement        | Number | 1     | Must enter<br>Legal: 0-6  |                                             |
| 86 f6  | the visits ...discuss          | Number | 1     | Must enter<br>Legal: 0-6  |                                             |
| 87 f7  | working on                     | Number | 1     | Must enter                |                                             |

BMJ Open

|     |       |                                         |        |    |                                                                              |                                                                                                       |
|-----|-------|-----------------------------------------|--------|----|------------------------------------------------------------------------------|-------------------------------------------------------------------------------------------------------|
| 88  | f8    | because of the discussion               | Number | 1  | Must enter<br>Legal: 0-6                                                     |                                                                                                       |
| 89  | f9    | After the training programme            | Number | 1  | Must enter<br>Legal: 0-3                                                     |                                                                                                       |
| 90  | f10a  | reasons given yes or no                 | Number | 1  | Must enter<br>Legal: 0-2<br>Jumps: 0>f11,2>f11                               | yesno<br>0: Blank<br>1: Yes<br>2: No                                                                  |
| 91  | f10b  | reason given 1                          | Text   | 78 | Must enter                                                                   |                                                                                                       |
| 92  | f10bb | reason given 1 continued                | Text   | 78 |                                                                              |                                                                                                       |
| 93  | f10c  | reason given 2                          | Text   | 78 | Must enter                                                                   |                                                                                                       |
| 94  | f10cc | reason given 2                          | Text   | 78 |                                                                              |                                                                                                       |
| 96  | f11   | if you answered no                      | Number | 1  | Must enter<br>Legal: 0-7<br>Jumps: 0>f12,1>f12,2>f12,3>f12,4>f12,5>f12,7>f12 |                                                                                                       |
| 99  | f11a  | Other Please specify in the space below | Text   | 78 | Must enter                                                                   |                                                                                                       |
| 99  | f11b  | Please specify                          | Text   | 78 |                                                                              |                                                                                                       |
| 99  | f12   | after the training programme            | Number | 1  | Must enter<br>Legal: 0-3                                                     |                                                                                                       |
| 99  | f13a  | reasons given yes or no                 | Number | 1  | Must enter<br>Legal: 0-2<br>Jumps: 0>f14,2>f14                               | yesno<br>0: Blank<br>1: Yes<br>2: No                                                                  |
| 100 | f13b  | reason given 1                          | Text   | 78 | Must enter                                                                   |                                                                                                       |
| 100 | f13bb | reason given 1 continued                | Text   | 78 |                                                                              |                                                                                                       |
| 102 | f13c  | reason given 2                          | Text   | 78 | Must enter                                                                   |                                                                                                       |
| 103 | f13cc | reason given 2                          | Text   | 78 |                                                                              |                                                                                                       |
| 104 | f14   | if you answered no                      | Number | 1  | Must enter<br>Legal: 0-7<br>Jumps: 0>g1,1>g1,2>g1,3>g1,4>g1,5>g1,7>g1        |                                                                                                       |
| 105 | f14a  | Other Please specify in the space below | Text   | 78 | Must enter                                                                   |                                                                                                       |
| 106 | f14b  | Please specify                          | Text   | 78 |                                                                              |                                                                                                       |
| 107 | g1    | my supervisor helps                     | Number | 1  | Must enter<br>Legal: 0-5                                                     | likert<br>0: Blank<br>1: Strongly a<br>2: Agree<br>3: Neither a nor d<br>4: Disagree<br>5: Strongly d |
| 107 | g2    | my supervisor encourages                | Number | 1  | Must enter<br>Legal: 0-5                                                     | likert<br>0: Blank<br>1: Strongly a<br>2: Agree<br>3: Neither a nor d<br>4: Disagree<br>5: Strongly d |
| 109 | g3    | my supervisor                           | Number | 1  | Must enter                                                                   | likert                                                                                                |

|     |     |                                      |        |   |                          |                                                                                                       |
|-----|-----|--------------------------------------|--------|---|--------------------------|-------------------------------------------------------------------------------------------------------|
| 1   |     |                                      |        |   |                          |                                                                                                       |
| 2   |     |                                      |        |   |                          |                                                                                                       |
| 3   | g4  | my supervisor encourages me to learn | Number | 1 | Must enter<br>Legal: 0-5 | likert<br>0: Blank<br>1: Strongly a<br>2: Agree<br>3: Neither a nor d<br>4: Disagree<br>5: Strongly d |
| 4   |     |                                      |        |   |                          |                                                                                                       |
| 5   |     |                                      |        |   |                          |                                                                                                       |
| 6   |     |                                      |        |   |                          |                                                                                                       |
| 7   |     |                                      |        |   |                          |                                                                                                       |
| 8   |     |                                      |        |   |                          |                                                                                                       |
| 9   |     |                                      |        |   |                          |                                                                                                       |
| 10  | g5  | my supervisor does not explain       | Number | 1 | Must enter<br>Legal: 0-5 | likert<br>0: Blank<br>1: Strongly a<br>2: Agree<br>3: Neither a nor d<br>4: Disagree<br>5: Strongly d |
| 11  |     |                                      |        |   |                          |                                                                                                       |
| 12  |     |                                      |        |   |                          |                                                                                                       |
| 13  |     |                                      |        |   |                          |                                                                                                       |
| 14  |     |                                      |        |   |                          |                                                                                                       |
| 15  |     |                                      |        |   |                          |                                                                                                       |
| 16  | g6  | my supervisor knows my reaction      | Number | 1 | Must enter<br>Legal: 0-5 | likert<br>0: Blank<br>1: Strongly a<br>2: Agree<br>3: Neither a nor d<br>4: Disagree<br>5: Strongly d |
| 17  |     |                                      |        |   |                          |                                                                                                       |
| 18  |     |                                      |        |   |                          |                                                                                                       |
| 19  |     |                                      |        |   |                          |                                                                                                       |
| 20  |     |                                      |        |   |                          |                                                                                                       |
| 21  |     |                                      |        |   |                          |                                                                                                       |
| 22  |     |                                      |        |   |                          |                                                                                                       |
| 23  | g7  | my supervisor helps me take          | Number | 1 | Must enter<br>Legal: 0-5 | likert<br>0: Blank<br>1: Strongly a<br>2: Agree<br>3: Neither a nor d<br>4: Disagree<br>5: Strongly d |
| 24  |     |                                      |        |   |                          |                                                                                                       |
| 25  |     |                                      |        |   |                          |                                                                                                       |
| 26  |     |                                      |        |   |                          |                                                                                                       |
| 27  |     |                                      |        |   |                          |                                                                                                       |
| 28  |     |                                      |        |   |                          |                                                                                                       |
| 29  | g8  | my supervisor does not give          | Number | 1 | Must enter<br>Legal: 0-5 | likert<br>0: Blank<br>1: Strongly a<br>2: Agree<br>3: Neither a nor d<br>4: Disagree<br>5: Strongly d |
| 30  |     |                                      |        |   |                          |                                                                                                       |
| 31  |     |                                      |        |   |                          |                                                                                                       |
| 32  |     |                                      |        |   |                          |                                                                                                       |
| 33  |     |                                      |        |   |                          |                                                                                                       |
| 34  |     |                                      |        |   |                          |                                                                                                       |
| 35  |     |                                      |        |   |                          |                                                                                                       |
| 36  | g9  | my supervisor trusts                 | Number | 1 | Must enter<br>Legal: 0-5 | likert<br>0: Blank<br>1: Strongly a<br>2: Agree<br>3: Neither a nor d<br>4: Disagree<br>5: Strongly d |
| 37  |     |                                      |        |   |                          |                                                                                                       |
| 38  |     |                                      |        |   |                          |                                                                                                       |
| 39  |     |                                      |        |   |                          |                                                                                                       |
| 40  |     |                                      |        |   |                          |                                                                                                       |
| 41  |     |                                      |        |   |                          |                                                                                                       |
| 42  |     |                                      |        |   |                          |                                                                                                       |
| 43  | g10 | my supervisor recognises             | Number | 1 | Must enter<br>Legal: 0-5 | likert<br>0: Blank<br>1: Strongly a<br>2: Agree<br>3: Neither a nor d<br>4: Disagree<br>5: Strongly d |
| 44  |     |                                      |        |   |                          |                                                                                                       |
| 45  |     |                                      |        |   |                          |                                                                                                       |
| 46  |     |                                      |        |   |                          |                                                                                                       |
| 47  |     |                                      |        |   |                          |                                                                                                       |
| 48  |     |                                      |        |   |                          |                                                                                                       |
| 49  | g11 | my supervisor is always              | Number | 1 | Must enter<br>Legal: 0-5 | likert<br>0: Blank<br>1: Strongly a<br>2: Agree<br>3: Neither a nor d<br>4: Disagree<br>5: Strongly d |
| 50  |     |                                      |        |   |                          |                                                                                                       |
| 51  |     |                                      |        |   |                          |                                                                                                       |
| 52  |     |                                      |        |   |                          |                                                                                                       |
| 53  |     |                                      |        |   |                          |                                                                                                       |
| 54  |     |                                      |        |   |                          |                                                                                                       |
| 55  |     |                                      |        |   |                          |                                                                                                       |
| 56  | g12 | my supervisor decides                | Number | 1 | Must enter<br>Legal: 0-5 | likert<br>0: Blank<br>1: Strongly a<br>2: Agree<br>3: Neither a nor d<br>4: Disagree<br>5: Strongly d |
| 57  |     |                                      |        |   |                          |                                                                                                       |
| 58  |     |                                      |        |   |                          |                                                                                                       |
| 59  |     |                                      |        |   |                          |                                                                                                       |
| 60  |     |                                      |        |   |                          |                                                                                                       |
| 119 | g13 | my supervisor finds fault            | Number | 1 | Must enter<br>Legal: 0-5 | likert<br>0: Blank<br>1: Strongly a                                                                   |

|     |     |                            |            |    |                                |                                                                                                       |
|-----|-----|----------------------------|------------|----|--------------------------------|-------------------------------------------------------------------------------------------------------|
| 120 | g14 | my supervisor and I        | Number     | 1  | Must enter<br>Legal: 0-5       | likert<br>0: Blank<br>1: Strongly a<br>2: Agree<br>3: Neither a nor d<br>4: Disagree<br>5: Strongly d |
| 121 | h1  | sex                        | Number     | 1  | Must enter<br>Legal: 0-2       | sex<br>1: Male<br>2: Female<br>9: Unknown                                                             |
| 122 | h2  | dob                        | Date (dmy) | 10 | Must enter                     |                                                                                                       |
| 123 | h3  | in what type of locality   | Number     | 1  | Must enter<br>Legal: 0-6       |                                                                                                       |
| 124 | h4  | educational qualifications | Number     | 1  | Must enter<br>Legal: 0-6       |                                                                                                       |
| 125 | h5  | in case of mbbs            | Number     | 1  | Must enter<br>Legal: 0-2       |                                                                                                       |
| 126 | h6  | year of joining            | Number     | 4  | Must enter<br>Legal: 1950-2011 |                                                                                                       |
| 127 | h7  | how many years             | Number     | 2  | Must enter<br>Legal: 0-35      |                                                                                                       |
| 128 | h8  | type of employment         | Number     | 1  | Must enter<br>Legal: 0-2       |                                                                                                       |
| 129 | h9  | if holding any additional  | Text       | 49 | Must enter                     |                                                                                                       |
| 130 | h10 | type of appointment        | Number     | 1  | Must enter<br>Legal: 0-2       |                                                                                                       |

View Only

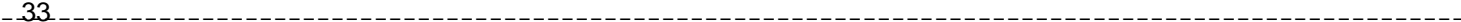

34  
 35  
 36  
 37  
 38  
 39  
 40  
 41  
 42  
 43  
 44  
 45  
 46  
 47  
 48  
 49  
 50  
 51  
 52  
 53  
 54  
 55  
 56  
 57  
 58  
 59  
 60

**CONFIDENTIAL**  
For research purposes only

September 2011

**Questionnaire for health managers**  
**on training programmes, planning and supervision**

*Greetings from Institute of Public Health, Bangalore!*

This survey has been designed by Institute of Public Health, Bangalore (IPH) to better understand the factors that influence management of health facilities and health care in your district and taluka.

The study is for research purposes only and the information that you provide in this questionnaire will help us gain a better understanding of district health management and help inform policy makers.

***Please read the following carefully before starting the questionnaire.***

- 1) The success of this research depends on frank and honest answers. We would like to assure you that your individual responses would be held in complete confidence.***
- 2) We are interested in your personal views on the questions and hence there are NO right or wrong answers. So please respond frankly to all questions.***

**All answers will be kept confidential.**

| <b>FOR OFFICE USE</b>                                                             |                                                                                  |  |
|-----------------------------------------------------------------------------------|----------------------------------------------------------------------------------|--|
| <b>To be filled in by the interviewer/facilitator AFTER FINISHING THE SURVEY.</b> |                                                                                  |  |
| <b>NOT FOR RESPONDENTS</b>                                                        |                                                                                  |  |
| A1                                                                                | Respondent number                                                                |  |
| A2                                                                                | Interviewer/Facilitator name                                                     |  |
| A3                                                                                | Date<br>(DD/MM/YY eg. 26/12/2011)                                                |  |
| A4                                                                                | Time taken<br>(To be filled up at the end of the interview – <b>in minutes</b> ) |  |
| A5                                                                                | Name of person doing data entry                                                  |  |
| A6                                                                                | Data entry checked by                                                            |  |



**CONFIDENTIAL**  
For research purposes only

September 2011

**B. WHAT DO YOU THINK ABOUT NRHM PIP AND PLANNING?**

This section helps us understand your opinions about NRHM PIP and its use.

*Please tick only ONE statement on the right hand side that BEST describes how you feel about the statement on the left hand side.*

|                                                                                                                   |    |                                                                                                      |                                                                                                                                                                                                                                                                                                                                                          |
|-------------------------------------------------------------------------------------------------------------------|----|------------------------------------------------------------------------------------------------------|----------------------------------------------------------------------------------------------------------------------------------------------------------------------------------------------------------------------------------------------------------------------------------------------------------------------------------------------------------|
| 1<br>2<br>3<br>4<br>5<br>6<br>7<br>8<br>9<br>10<br>11<br>12<br>13<br>14<br>15<br>16<br>17<br>18<br>19<br>20<br>21 | B1 | The purpose of the NRHM PIP is to...                                                                 | 1 <input type="checkbox"/> Evaluate the performance of my facility during the year<br>2 <input type="checkbox"/> Collect data for planning at district or state level<br>3 <input type="checkbox"/> Planning of all activities of my facility for the year<br>4 <input type="checkbox"/> Assessment of performance of NRHM in my facility during<br>year |
| 22<br>23<br>24<br>25<br>26<br>27<br>28<br>29<br>30<br>31<br>32                                                    | B2 | If I were in charge of NRHM, the most peripheral level at which I would make the PIP would be at.... | 1 <input type="checkbox"/> State<br>2 <input type="checkbox"/> District<br>3 <input type="checkbox"/> Taluka<br>4 <input type="checkbox"/> PHC<br>5 <input type="checkbox"/> Village health and sanitation committee                                                                                                                                     |
| 33<br>34<br>35<br>36<br>37<br>38<br>39<br>40<br>41                                                                | B3 | At the PHC level, PIP should be made by...                                                           | 1 <input type="checkbox"/> PHC MO and LHV<br>2 <input type="checkbox"/> PHC MO and all field staff<br>3 <input type="checkbox"/> PHC staff, ARS and PRI members<br>4 <input type="checkbox"/> PIP should not be prepared at PHC level                                                                                                                    |
| 42<br>43<br>44<br>45<br>46<br>47<br>48<br>49<br>50<br>51<br>52<br>53<br>54<br>55<br>56<br>57<br>58                | B4 | At the taluka level, PIP should be made by...                                                        | 1 <input type="checkbox"/> THO and BPMU staff<br>2 <input type="checkbox"/> THO, BPMU along with all PHC MOs<br>3 <input type="checkbox"/> THO, BPMU and AMO<br>4 <input type="checkbox"/> THO, BPMU, AMO, ARS and PRI members<br>5 <input type="checkbox"/> PIP should not be made at taluka level                                                      |

**CONFIDENTIAL**  
For research purposes only

September 2011

|                                                                                                                                                                                                                                                                                                                                                             |                                                                                                                                                                |                                                                                                                                                                                                                                                                                                                                                                                                                                                                                                                                                                                                                                                                                                                                                                                                                                                               |                          |                          |                                   |                          |                          |
|-------------------------------------------------------------------------------------------------------------------------------------------------------------------------------------------------------------------------------------------------------------------------------------------------------------------------------------------------------------|----------------------------------------------------------------------------------------------------------------------------------------------------------------|---------------------------------------------------------------------------------------------------------------------------------------------------------------------------------------------------------------------------------------------------------------------------------------------------------------------------------------------------------------------------------------------------------------------------------------------------------------------------------------------------------------------------------------------------------------------------------------------------------------------------------------------------------------------------------------------------------------------------------------------------------------------------------------------------------------------------------------------------------------|--------------------------|--------------------------|-----------------------------------|--------------------------|--------------------------|
| 1<br>2<br>3<br>4<br>5<br>6<br>7<br>8<br>9<br>10<br>11<br>12<br>13<br>14<br>15<br>16<br>17<br>18<br>19<br>20<br>21<br>22<br>23<br>24<br>25<br>26<br>27<br>28<br>29<br>30<br>31<br>32<br>33<br>34<br>35<br>36<br>37<br>38<br>39<br>40<br>41<br>42<br>43<br>44<br>45<br>46<br>47<br>48<br>49<br>50<br>51<br>52<br>53<br>54<br>55<br>56<br>57<br>58<br>59<br>60 | <p><b>B5</b> <i>Please read each of the statements carefully.</i><br/>Which statement best summarises how you feel about the role of NRHM PIP in your work</p> | <p>1 <input type="checkbox"/> The role of the PIP is to collect data from village level to district level and submit to state so that micro-level data is available at the state level</p> <p>2 <input type="checkbox"/> The PIP is a plan for my facility/taluka/district based on situation analysis which helps identify problems and find solutions</p> <p>3 <input type="checkbox"/> PIP is one of the important requirements for obtaining resources through NRHM that must be satisfied by all health facilities in the district</p> <p>4 <input type="checkbox"/> PIP is time-consuming and does not really help me in my routine work through the year</p> <p>5 <input type="checkbox"/> PIP helps me budget activities based on my need and guides all my programmes and activities through the year</p> <p>6 <input type="checkbox"/> Not sure</p> |                          |                          |                                   |                          |                          |
|                                                                                                                                                                                                                                                                                                                                                             |                                                                                                                                                                | <table border="1" style="width: 100%; border-collapse: collapse;"> <tr> <td style="width: 20%;"><b>Strongly agree</b></td> <td style="width: 20%;"><b>Agree</b></td> <td style="width: 20%;"><b>Neither agree nor disagree</b></td> <td style="width: 20%;"><b>Disagree</b></td> <td style="width: 20%;"><b>Strongly disagree</b></td> </tr> </table>                                                                                                                                                                                                                                                                                                                                                                                                                                                                                                         | <b>Strongly agree</b>    | <b>Agree</b>             | <b>Neither agree nor disagree</b> | <b>Disagree</b>          | <b>Strongly disagree</b> |
| <b>Strongly agree</b>                                                                                                                                                                                                                                                                                                                                       | <b>Agree</b>                                                                                                                                                   | <b>Neither agree nor disagree</b>                                                                                                                                                                                                                                                                                                                                                                                                                                                                                                                                                                                                                                                                                                                                                                                                                             | <b>Disagree</b>          | <b>Strongly disagree</b> |                                   |                          |                          |
|                                                                                                                                                                                                                                                                                                                                                             | <p><b>B6</b> For every PIP, we must do a situation analysis as the first step before proceeding with the planning</p>                                          | <table border="1" style="width: 100%; border-collapse: collapse;"> <tr> <td style="width: 20%; text-align: center;"><input type="checkbox"/></td> </tr> </table>                                                                                                                                                                                                                                                                                                                                                                                      | <input type="checkbox"/> | <input type="checkbox"/> | <input type="checkbox"/>          | <input type="checkbox"/> | <input type="checkbox"/> |
| <input type="checkbox"/>                                                                                                                                                                                                                                                                                                                                    | <input type="checkbox"/>                                                                                                                                       | <input type="checkbox"/>                                                                                                                                                                                                                                                                                                                                                                                                                                                                                                                                                                                                                                                                                                                                                                                                                                      | <input type="checkbox"/> | <input type="checkbox"/> |                                   |                          |                          |
|                                                                                                                                                                                                                                                                                                                                                             | <p><b>B7</b> PIPs can be used to bring about improvement in the quality of care of facilities</p>                                                              | <table border="1" style="width: 100%; border-collapse: collapse;"> <tr> <td style="width: 20%; text-align: center;"><input type="checkbox"/></td> </tr> </table>                                                                                                                                                                                                                                                                                                                                                                                      | <input type="checkbox"/> | <input type="checkbox"/> | <input type="checkbox"/>          | <input type="checkbox"/> | <input type="checkbox"/> |
| <input type="checkbox"/>                                                                                                                                                                                                                                                                                                                                    | <input type="checkbox"/>                                                                                                                                       | <input type="checkbox"/>                                                                                                                                                                                                                                                                                                                                                                                                                                                                                                                                                                                                                                                                                                                                                                                                                                      | <input type="checkbox"/> | <input type="checkbox"/> |                                   |                          |                          |
|                                                                                                                                                                                                                                                                                                                                                             | <p><b>B8</b> Districts need technical guidance in carrying out a situation analysis for the PIP</p>                                                            | <table border="1" style="width: 100%; border-collapse: collapse;"> <tr> <td style="width: 20%; text-align: center;"><input type="checkbox"/></td> </tr> </table>                                                                                                                                                                                                                                                                                                                                                                                      | <input type="checkbox"/> | <input type="checkbox"/> | <input type="checkbox"/>          | <input type="checkbox"/> | <input type="checkbox"/> |
| <input type="checkbox"/>                                                                                                                                                                                                                                                                                                                                    | <input type="checkbox"/>                                                                                                                                       | <input type="checkbox"/>                                                                                                                                                                                                                                                                                                                                                                                                                                                                                                                                                                                                                                                                                                                                                                                                                                      | <input type="checkbox"/> | <input type="checkbox"/> |                                   |                          |                          |
|                                                                                                                                                                                                                                                                                                                                                             | <p><b>B9</b> Talukas need technical guidance in carrying out a situation analysis for PIP</p>                                                                  | <table border="1" style="width: 100%; border-collapse: collapse;"> <tr> <td style="width: 20%; text-align: center;"><input type="checkbox"/></td> </tr> </table>                                                                                                                                                                                                                                                                                                                                                                                      | <input type="checkbox"/> | <input type="checkbox"/> | <input type="checkbox"/>          | <input type="checkbox"/> | <input type="checkbox"/> |
| <input type="checkbox"/>                                                                                                                                                                                                                                                                                                                                    | <input type="checkbox"/>                                                                                                                                       | <input type="checkbox"/>                                                                                                                                                                                                                                                                                                                                                                                                                                                                                                                                                                                                                                                                                                                                                                                                                                      | <input type="checkbox"/> | <input type="checkbox"/> |                                   |                          |                          |
|                                                                                                                                                                                                                                                                                                                                                             | <p><b>B10</b> PHCs need technical guidance in carrying out situation analysis for PIP</p>                                                                      | <table border="1" style="width: 100%; border-collapse: collapse;"> <tr> <td style="width: 20%; text-align: center;"><input type="checkbox"/></td> </tr> </table>                                                                                                                                                                                                                                                                                                                                                                                      | <input type="checkbox"/> | <input type="checkbox"/> | <input type="checkbox"/>          | <input type="checkbox"/> | <input type="checkbox"/> |
| <input type="checkbox"/>                                                                                                                                                                                                                                                                                                                                    | <input type="checkbox"/>                                                                                                                                       | <input type="checkbox"/>                                                                                                                                                                                                                                                                                                                                                                                                                                                                                                                                                                                                                                                                                                                                                                                                                                      | <input type="checkbox"/> | <input type="checkbox"/> |                                   |                          |                          |
|                                                                                                                                                                                                                                                                                                                                                             | <p><b>B11</b> PIP preparation at taluka level improves teamwork among doctors, nurses and BPMs</p>                                                             | <table border="1" style="width: 100%; border-collapse: collapse;"> <tr> <td style="width: 20%; text-align: center;"><input type="checkbox"/></td> </tr> </table>                                                                                                                                                                                                                                                                                                                                                                                      | <input type="checkbox"/> | <input type="checkbox"/> | <input type="checkbox"/>          | <input type="checkbox"/> | <input type="checkbox"/> |
| <input type="checkbox"/>                                                                                                                                                                                                                                                                                                                                    | <input type="checkbox"/>                                                                                                                                       | <input type="checkbox"/>                                                                                                                                                                                                                                                                                                                                                                                                                                                                                                                                                                                                                                                                                                                                                                                                                                      | <input type="checkbox"/> | <input type="checkbox"/> |                                   |                          |                          |
|                                                                                                                                                                                                                                                                                                                                                             | <p><b>B12</b> I am able to negotiate the priorities of my facility with my superiors so that they could be included in the district PIP</p>                    | <table border="1" style="width: 100%; border-collapse: collapse;"> <tr> <td style="width: 20%; text-align: center;"><input type="checkbox"/></td> </tr> </table>                                                                                                                                                                                                                                                                                                                                                                                      | <input type="checkbox"/> | <input type="checkbox"/> | <input type="checkbox"/>          | <input type="checkbox"/> | <input type="checkbox"/> |
| <input type="checkbox"/>                                                                                                                                                                                                                                                                                                                                    | <input type="checkbox"/>                                                                                                                                       | <input type="checkbox"/>                                                                                                                                                                                                                                                                                                                                                                                                                                                                                                                                                                                                                                                                                                                                                                                                                                      | <input type="checkbox"/> | <input type="checkbox"/> |                                   |                          |                          |

3

For any clarifications regarding this survey, please contact the facilitator who is administering this survey or contact:  
Dr. Prashanth NS, Institute of Public Health, Bangalore. Phone: [REDACTED]

**CONFIDENTIAL**  
For research purposes only

September 2011

|     |                                                                                                                                                                     | <b>Strongly agree</b>    | <b>Agree</b>             | <b>Neither agree nor disagree</b> | <b>Disagree</b>          | <b>Strongly disagree</b> |
|-----|---------------------------------------------------------------------------------------------------------------------------------------------------------------------|--------------------------|--------------------------|-----------------------------------|--------------------------|--------------------------|
| B13 | In this year's PIP (December 2010), we collected data to do a situation analysis for my facility                                                                    | <input type="checkbox"/> | <input type="checkbox"/> | <input type="checkbox"/>          | <input type="checkbox"/> | <input type="checkbox"/> |
| B14 | The activities that we included in the PIP were based on a situation analysis of my facility                                                                        | <input type="checkbox"/> | <input type="checkbox"/> | <input type="checkbox"/>          | <input type="checkbox"/> | <input type="checkbox"/> |
| B15 | After the NRHM PIP process has started, problems in my facility are being better identified than before                                                             | <input type="checkbox"/> | <input type="checkbox"/> | <input type="checkbox"/>          | <input type="checkbox"/> | <input type="checkbox"/> |
| B16 | After the submission of PIP, I come to know soon about the financial allocation for my facility                                                                     | <input type="checkbox"/> | <input type="checkbox"/> | <input type="checkbox"/>          | <input type="checkbox"/> | <input type="checkbox"/> |
| B17 | In my district, most of my colleagues at the taluka level were actively involved in preparing the PIP this year                                                     | <input type="checkbox"/> | <input type="checkbox"/> | <input type="checkbox"/>          | <input type="checkbox"/> | <input type="checkbox"/> |
| B18 | In my district, most PHCs were also actively involved in preparing the PIP                                                                                          | <input type="checkbox"/> | <input type="checkbox"/> | <input type="checkbox"/>          | <input type="checkbox"/> | <input type="checkbox"/> |
| B19 | In my facility, all the staff participated in preparing the PIP                                                                                                     | <input type="checkbox"/> | <input type="checkbox"/> | <input type="checkbox"/>          | <input type="checkbox"/> | <input type="checkbox"/> |
| B20 | I am able to discuss and negotiate with Panchayat members regarding utilisation of the various joint funds (untied funds/ARS funds and other joint signatory funds) | <input type="checkbox"/> | <input type="checkbox"/> | <input type="checkbox"/>          | <input type="checkbox"/> | <input type="checkbox"/> |

**CONFIDENTIAL**  
For research purposes only

September 2011

**C. HOW DO YOU RELATE TO YOUR ORGANISATION?**

In this section, we ask you questions about how you feel about your organisation. For this section, "ORGANISATION" means your hospital/taluka/district depending on where you work.

|     |                                                                                                 | Strongly agree           | Agree                    | Neither agree nor disagree | Disagree                 | Strongly disagree        |
|-----|-------------------------------------------------------------------------------------------------|--------------------------|--------------------------|----------------------------|--------------------------|--------------------------|
| C1  | It is difficult for me to leave the organization right now, even if I wanted to leave           | <input type="checkbox"/> | <input type="checkbox"/> | <input type="checkbox"/>   | <input type="checkbox"/> | <input type="checkbox"/> |
| C2  | I would not leave my present organisation right now because of a sense of obligation            | <input type="checkbox"/> | <input type="checkbox"/> | <input type="checkbox"/>   | <input type="checkbox"/> | <input type="checkbox"/> |
| C3  | I would be very happy to spend rest of my career in this organization                           | <input type="checkbox"/> | <input type="checkbox"/> | <input type="checkbox"/>   | <input type="checkbox"/> | <input type="checkbox"/> |
| C4  | I will not leave the organisation right now mainly because there are not many choices available | <input type="checkbox"/> | <input type="checkbox"/> | <input type="checkbox"/>   | <input type="checkbox"/> | <input type="checkbox"/> |
| C5  | Even if it were to my advantage, I do not feel it would be right to leave the organisation now  | <input type="checkbox"/> | <input type="checkbox"/> | <input type="checkbox"/>   | <input type="checkbox"/> | <input type="checkbox"/> |
| C6  | I really feel as if my organisation's problems are my own                                       | <input type="checkbox"/> | <input type="checkbox"/> | <input type="checkbox"/>   | <input type="checkbox"/> | <input type="checkbox"/> |
| C7  | Right now, staying in this organisation is both a necessity and a desire.                       | <input type="checkbox"/> | <input type="checkbox"/> | <input type="checkbox"/>   | <input type="checkbox"/> | <input type="checkbox"/> |
| C8  | I do not feel a strong sense of "belonging" to my organisation                                  | <input type="checkbox"/> | <input type="checkbox"/> | <input type="checkbox"/>   | <input type="checkbox"/> | <input type="checkbox"/> |
| C9  | I think that there are very few options for me to consider leaving this organisation            | <input type="checkbox"/> | <input type="checkbox"/> | <input type="checkbox"/>   | <input type="checkbox"/> | <input type="checkbox"/> |
| C10 | I do not feel emotionally attached to this organisation                                         | <input type="checkbox"/> | <input type="checkbox"/> | <input type="checkbox"/>   | <input type="checkbox"/> | <input type="checkbox"/> |
| C11 | I would feel guilty if I leave this organisation right now                                      | <input type="checkbox"/> | <input type="checkbox"/> | <input type="checkbox"/>   | <input type="checkbox"/> | <input type="checkbox"/> |
| C12 | I do not feel like "part of a family" at my workplace                                           | <input type="checkbox"/> | <input type="checkbox"/> | <input type="checkbox"/>   | <input type="checkbox"/> | <input type="checkbox"/> |

**CONFIDENTIAL**  
For research purposes only

September 2011

|     |                                                                                                                                 | <b>Strongly agree</b>    | <b>Agree</b>             | <b>Neither agree nor disagree</b> | <b>Disagree</b>          | <b>Strongly disagree</b> |
|-----|---------------------------------------------------------------------------------------------------------------------------------|--------------------------|--------------------------|-----------------------------------|--------------------------|--------------------------|
| C13 | This organization deserves my loyalty                                                                                           | <input type="checkbox"/> | <input type="checkbox"/> | <input type="checkbox"/>          | <input type="checkbox"/> | <input type="checkbox"/> |
| C14 | I might consider working elsewhere if I had not already put so much of myself into this organisation                            | <input type="checkbox"/> | <input type="checkbox"/> | <input type="checkbox"/>          | <input type="checkbox"/> | <input type="checkbox"/> |
| C15 | I would not consider leaving the organisation right now because I feel a sense of obligation to the people in this organisation | <input type="checkbox"/> | <input type="checkbox"/> | <input type="checkbox"/>          | <input type="checkbox"/> | <input type="checkbox"/> |
| C16 | This organisation has a great deal of personal meaning for me                                                                   | <input type="checkbox"/> | <input type="checkbox"/> | <input type="checkbox"/>          | <input type="checkbox"/> | <input type="checkbox"/> |
| C17 | Too much of my personal life would be disturbed if I wanted to leave this organisation right now                                | <input type="checkbox"/> | <input type="checkbox"/> | <input type="checkbox"/>          | <input type="checkbox"/> | <input type="checkbox"/> |
| C18 | I owe a great deal to my organization                                                                                           | <input type="checkbox"/> | <input type="checkbox"/> | <input type="checkbox"/>          | <input type="checkbox"/> | <input type="checkbox"/> |

**CONFIDENTIAL**  
For research purposes only

September 2011

**D. HOW CONFIDENT ARE YOU WITH RESPECT TO YOUR EFFICACY AT DEALING WITH PRI MEMBER DEMANDS?**

*Think about a situation such as a conflict with a PRI or community member making what you feel are unreasonable demands on your time/staff or resources.*

Given that you face such circumstances routinely, please rate how certain you are that you can do each of the things described below by circling the number from 0 – 100 that best captures your degree of confidence.

Rate your degree of confidence by recording a number from 0 to 100 using the scale given below:

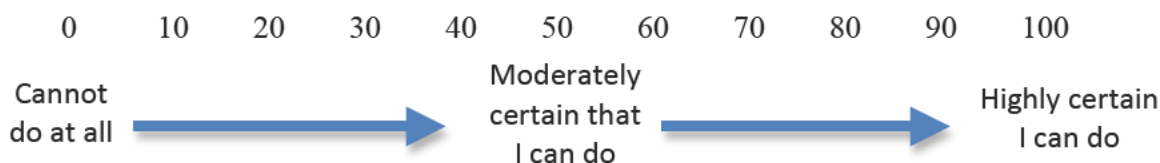

|    |                                                                           | <b>CIRCLE BASED ON THE SCALE GIVEN ABOVE</b> |    |    |    |    |    |    |    |    |    |     |
|----|---------------------------------------------------------------------------|----------------------------------------------|----|----|----|----|----|----|----|----|----|-----|
| D1 | I can solve difficult problems if I try hard enough                       | 0                                            | 10 | 20 | 30 | 40 | 50 | 60 | 70 | 80 | 90 | 100 |
| D2 | If someone opposes me, I can find ways to get what I want                 | 0                                            | 10 | 20 | 30 | 40 | 50 | 60 | 70 | 80 | 90 | 100 |
| D3 | It is easy for me to stick to my aims and accomplish my goals             | 0                                            | 10 | 20 | 30 | 40 | 50 | 60 | 70 | 80 | 90 | 100 |
| D4 | I am confident that I could deal efficiently with unexpected events       | 0                                            | 10 | 20 | 30 | 40 | 50 | 60 | 70 | 80 | 90 | 100 |
| D5 | Thanks to my strategic nature, I know how to handle unexpected situations | 0                                            | 10 | 20 | 30 | 40 | 50 | 60 | 70 | 80 | 90 | 100 |

**CONFIDENTIAL**  
For research purposes only

September 2011

|     |                                                                                      |   |    |    |    |    |    |    |    |    |    |     |
|-----|--------------------------------------------------------------------------------------|---|----|----|----|----|----|----|----|----|----|-----|
| D6  | I can solve most problems if I invest the necessary effort                           | 0 | 10 | 20 | 30 | 40 | 50 | 60 | 70 | 80 | 90 | 100 |
| D7  | I can remain calm when facing difficulties because I can rely on my coping abilities | 0 | 10 | 20 | 30 | 40 | 50 | 60 | 70 | 80 | 90 | 100 |
| D8  | When I am confronted with a problem, I can usually find several solutions            | 0 | 10 | 20 | 30 | 40 | 50 | 60 | 70 | 80 | 90 | 100 |
| D9  | If I am in trouble, I can usually think of something to do                           | 0 | 10 | 20 | 30 | 40 | 50 | 60 | 70 | 80 | 90 | 100 |
| D10 | No matter what comes my way, I'm usually able to handle it                           | 0 | 10 | 20 | 30 | 40 | 50 | 60 | 70 | 80 | 90 | 100 |

**E: WHAT WAS THE NATURE OF TRAINING PROGRAMMES IN YOUR DISTRICT?**

For those in Tumkur district, please answer this section with respect to the Swasthya Karnataka training programme.

|    |                                                                                                                                                    | Response<br><i>Tick your response wherever there is a box.<br/>Elsewhere, please write your response</i> |
|----|----------------------------------------------------------------------------------------------------------------------------------------------------|----------------------------------------------------------------------------------------------------------|
| E1 | District                                                                                                                                           | 1 <input type="checkbox"/> Tumkur<br>2 <input type="checkbox"/> Raichur                                  |
| E2 | Taluka where your work                                                                                                                             |                                                                                                          |
| E3 | Primary designation                                                                                                                                |                                                                                                          |
| E4 | How long have you held your present designation<br><i>(In years, including period on contract.<br/>Write &lt;1 if held for less than one year)</i> |                                                                                                          |

**CONFIDENTIAL**  
For research purposes only

September 2011

|                                                                                                                                                                   |                                                                                                                                                                |                                                                                                                                                                                |                                                                                                                                                                                                                                                                                                                                                                                                                                                                                                                                                                                                                                                                                                                                                                                                                                                                                       |
|-------------------------------------------------------------------------------------------------------------------------------------------------------------------|----------------------------------------------------------------------------------------------------------------------------------------------------------------|--------------------------------------------------------------------------------------------------------------------------------------------------------------------------------|---------------------------------------------------------------------------------------------------------------------------------------------------------------------------------------------------------------------------------------------------------------------------------------------------------------------------------------------------------------------------------------------------------------------------------------------------------------------------------------------------------------------------------------------------------------------------------------------------------------------------------------------------------------------------------------------------------------------------------------------------------------------------------------------------------------------------------------------------------------------------------------|
| 1<br>2<br>3<br>4<br>5<br>6<br>7<br>8<br>9<br>10<br>11<br>12<br>13<br>14<br>15<br>16<br>17<br>18<br>19<br>20<br>21<br>22<br>23<br>24<br>25<br>26<br>27<br>28<br>29 | E5                                                                                                                                                             | Which among these topics were covered in the training programmes you attended in the last two years (2009-2011)?<br><br><i>Circle how many ever topics that apply</i>          | 1 <input type="checkbox"/> Concepts in public health<br>2 <input type="checkbox"/> Leadership<br>3 <input type="checkbox"/> Planning<br>4 <input type="checkbox"/> Human resources planning & Motivation<br>5 <input type="checkbox"/> Administrative procedures<br>6 <input type="checkbox"/> Health and hospital management<br>7 <input type="checkbox"/> HMIS<br>8 <input type="checkbox"/> Health and hospital management<br>9 <input type="checkbox"/> Financial and medico-legal procedures<br>10 <input type="checkbox"/> Teamwork<br>11 <input type="checkbox"/> Emergency Obstetric Care<br>12 <input type="checkbox"/> Role of PRI in health system<br>13 <input type="checkbox"/> NRHM PIP planning<br>14 <input type="checkbox"/> Supportive supervision<br>15 <input type="checkbox"/> Quality in health care<br>16 <input type="checkbox"/> Other topic not listed here |
| 30<br>31<br>32                                                                                                                                                    | <i>If you have not participated in the Swasthya Karnataka Training Programme, then skip the rest of this section and proceed to Section F on the next page</i> |                                                                                                                                                                                |                                                                                                                                                                                                                                                                                                                                                                                                                                                                                                                                                                                                                                                                                                                                                                                                                                                                                       |
| 33<br>34<br>35<br>36<br>37<br>38                                                                                                                                  | E6                                                                                                                                                             | Have you attended the Swasthya Karnataka training programme?                                                                                                                   | 1 <input type="checkbox"/> YES<br>2 <input type="checkbox"/> NO<br>3 <input type="checkbox"/> Not sure                                                                                                                                                                                                                                                                                                                                                                                                                                                                                                                                                                                                                                                                                                                                                                                |
| 39<br>40<br>41<br>42<br>43<br>44<br>45<br>46<br>47                                                                                                                | E7                                                                                                                                                             | <b>IF YES</b> , which components of the Swasthya Karnataka training programme have you attended?                                                                               | 1 <input type="checkbox"/> Contact classes<br>2 <input type="checkbox"/> Discussion with Swasthya Karnataka trainers during visits to my facility/institution<br>3 <input type="checkbox"/> Both<br>4 <input type="checkbox"/> Not sure                                                                                                                                                                                                                                                                                                                                                                                                                                                                                                                                                                                                                                               |
| 48<br>49<br>50<br>51<br>52                                                                                                                                        | E8                                                                                                                                                             | In the Swasthya Karnataka training programme, how many classes did you attend? (Max N=12)<br><i>(Each class consisted of one or more consecutive days of contact sessions)</i> |                                                                                                                                                                                                                                                                                                                                                                                                                                                                                                                                                                                                                                                                                                                                                                                                                                                                                       |
| 53<br>54<br>55<br>56<br>57                                                                                                                                        | E9                                                                                                                                                             | Have you been visited by Swasthya Karnataka trainers at your facility for helping you apply what was covered in the classes?                                                   | 1 <input type="checkbox"/> YES<br>2 <input type="checkbox"/> NO<br>3 <input type="checkbox"/> Don't know                                                                                                                                                                                                                                                                                                                                                                                                                                                                                                                                                                                                                                                                                                                                                                              |
| 58<br>59<br>60                                                                                                                                                    | E10                                                                                                                                                            | <b>IF YES</b> , how many times have you been visited by Swasthya Karnataka trainers in the last two years?                                                                     |                                                                                                                                                                                                                                                                                                                                                                                                                                                                                                                                                                                                                                                                                                                                                                                                                                                                                       |



**CONFIDENTIAL**  
For research purposes only

September 2011

**F. WHAT DO YOU THINK ABOUT THE TRAINING PROGRAMMES IN YOUR DISTRICT?**

Please respond to this section based on your experience with the Swasthya Karnataka programme. If you have not attended the Swasthya Karnataka programme, then please respond keeping in mind the training programmes in your district that dealt with NRHM PIP planning or supervision in the last two years.

*Tick the response that best captures what you think about each statement.*

|    |                                                                                                                                        | Strongly agree           | Agree                    | Neither agree nor disagree | Disagree                 | Strongly disagree        | Not applicable           |
|----|----------------------------------------------------------------------------------------------------------------------------------------|--------------------------|--------------------------|----------------------------|--------------------------|--------------------------|--------------------------|
| F1 | The content of the classroom teaching during the training programmes were relevant to my work                                          | <input type="checkbox"/> | <input type="checkbox"/> | <input type="checkbox"/>   | <input type="checkbox"/> | <input type="checkbox"/> | <input type="checkbox"/> |
| F2 | After attending the classes, my knowledge on the topics taught improved                                                                | <input type="checkbox"/> | <input type="checkbox"/> | <input type="checkbox"/>   | <input type="checkbox"/> | <input type="checkbox"/> | <input type="checkbox"/> |
| F3 | After the classes, I can better understand the importance of NRHM PIP in managing the services under my responsibility                 | <input type="checkbox"/> | <input type="checkbox"/> | <input type="checkbox"/>   | <input type="checkbox"/> | <input type="checkbox"/> | <input type="checkbox"/> |
| F4 | The visits by trainers motivated me to apply new skills learnt during the training                                                     | <input type="checkbox"/> | <input type="checkbox"/> | <input type="checkbox"/>   | <input type="checkbox"/> | <input type="checkbox"/> | <input type="checkbox"/> |
| F5 | The visits by the trainers motivated me to implement changes to improve in my institution                                              | <input type="checkbox"/> | <input type="checkbox"/> | <input type="checkbox"/>   | <input type="checkbox"/> | <input type="checkbox"/> | <input type="checkbox"/> |
| F6 | The visits by trainers to my workplace help me to discuss problems I faced in applying what is taught in classroom training programmes | <input type="checkbox"/> | <input type="checkbox"/> | <input type="checkbox"/>   | <input type="checkbox"/> | <input type="checkbox"/> | <input type="checkbox"/> |
| F7 | Working on assignments given during the training along with my colleagues and subordinates improved teamwork in my organisation.       | <input type="checkbox"/> | <input type="checkbox"/> | <input type="checkbox"/>   | <input type="checkbox"/> | <input type="checkbox"/> | <input type="checkbox"/> |
| F8 | Because of the discussion with my colleagues and subordinates during trainers' visit, their confidence in me as a manager increased    | <input type="checkbox"/> | <input type="checkbox"/> | <input type="checkbox"/>   | <input type="checkbox"/> | <input type="checkbox"/> | <input type="checkbox"/> |



**CONFIDENTIAL**  
For research purposes only

September 2011

|                                                                                                                                                                                        |     |                                                                                                                                                                                              |                                                                                                                                                                                                                                                                                                                                                                                                                                                                                                                                                                                                                                                                                                               |
|----------------------------------------------------------------------------------------------------------------------------------------------------------------------------------------|-----|----------------------------------------------------------------------------------------------------------------------------------------------------------------------------------------------|---------------------------------------------------------------------------------------------------------------------------------------------------------------------------------------------------------------------------------------------------------------------------------------------------------------------------------------------------------------------------------------------------------------------------------------------------------------------------------------------------------------------------------------------------------------------------------------------------------------------------------------------------------------------------------------------------------------|
| 1<br>2<br>3<br>4<br>5<br>6<br>7<br>8<br>9<br>10<br>11<br>12<br>13<br>14<br>15<br>16<br>17<br>18<br>19<br>20<br>21<br>22<br>23<br>24                                                    | F13 | <p><b>If you answered YES to the previous question,</b><br/>In the space provided, please give TWO examples of how you improved your supervision practices after the training programme.</p> | <p>1)</p> <p>2)</p> <p><input type="checkbox"/> Not applicable because I answered NO/Not sure to Question F9</p>                                                                                                                                                                                                                                                                                                                                                                                                                                                                                                                                                                                              |
| 25<br>26<br>27<br>28<br>29<br>30<br>31<br>32<br>33<br>34<br>35<br>36<br>37<br>38<br>39<br>40<br>41<br>42<br>43<br>44<br>45<br>46<br>47<br>48<br>49<br>50<br>51<br>52<br>53<br>54<br>55 | F14 | <p><b>If you answered NO to F12,</b><br/>What were the main reasons for not making any improvements in your supervision practices?<br/><br/><i>(Tick as many as appropriate)</i></p>         | <p>1 <input type="checkbox"/> The training did not provide any help in improving supervision of staff</p> <p>2 <input type="checkbox"/> There are several constraints in the organisation that prevent me from changing supervision practices</p> <p>3 <input type="checkbox"/> I do not have the necessary technical skills/knowledge to bring about improvements</p> <p>4 <input type="checkbox"/> It is not within my power to make such changes</p> <p>5 <input type="checkbox"/> I do not supervise anybody</p> <p>6 <input type="checkbox"/> Other – Please specify in the space below</p> <p>7 <input type="checkbox"/> This question is <b>not applicable</b> to me because I answered YES to F12</p> |

**CONFIDENTIAL**  
For research purposes only

September 2011

**G. WHAT ARE YOUR OPINIONS ABOUT SUPERVISION BY YOUR IMMEDIATE SUPERIOR?**

This section is about your experience with supervision and supervision visits. For this section, your supervisor is the person you **report to**, and who supervises your work. This is usually an officer one rank above you. For example, a BPM is supervised by THO, while THO's are supervised by DHO. DHO's and programme officers are supervised by Directors or Joint Directors respectively. PHC MOs are supervised by THOs.

|     |                                                                                                                                | <b>Strongly agree</b>    | <b>Agree</b>             | <b>Neither agree nor disagree</b> | <b>Disagree</b>          | <b>Strongly disagree</b> |
|-----|--------------------------------------------------------------------------------------------------------------------------------|--------------------------|--------------------------|-----------------------------------|--------------------------|--------------------------|
| G1  | My supervisor helps me solve work-related problems such as implementation issues with new schemes or problems with PRI members | <input type="checkbox"/> | <input type="checkbox"/> | <input type="checkbox"/>          | <input type="checkbox"/> | <input type="checkbox"/> |
| G2  | My supervisor encourages us to speak up when we have a different opinion on a decision he has taken                            | <input type="checkbox"/> | <input type="checkbox"/> | <input type="checkbox"/>          | <input type="checkbox"/> | <input type="checkbox"/> |
| G3  | My supervisor leaves it entirely up to me to decide how to go about doing my job                                               | <input type="checkbox"/> | <input type="checkbox"/> | <input type="checkbox"/>          | <input type="checkbox"/> | <input type="checkbox"/> |
| G4  | My supervisor encourages me to learn new things related to my work                                                             | <input type="checkbox"/> | <input type="checkbox"/> | <input type="checkbox"/>          | <input type="checkbox"/> | <input type="checkbox"/> |
| G5  | My supervisor does not explain his or her actions or decisions                                                                 | <input type="checkbox"/> | <input type="checkbox"/> | <input type="checkbox"/>          | <input type="checkbox"/> | <input type="checkbox"/> |
| G6  | My supervisor knows my reaction to various issues at work                                                                      | <input type="checkbox"/> | <input type="checkbox"/> | <input type="checkbox"/>          | <input type="checkbox"/> | <input type="checkbox"/> |
| G7  | My supervisor helps me take important decisions                                                                                | <input type="checkbox"/> | <input type="checkbox"/> | <input type="checkbox"/>          | <input type="checkbox"/> | <input type="checkbox"/> |
| G8  | My supervisor does not give me a chance to make important decisions on my own                                                  | <input type="checkbox"/> | <input type="checkbox"/> | <input type="checkbox"/>          | <input type="checkbox"/> | <input type="checkbox"/> |
| G9  | My supervisor trusts my actions and <i>vice versa</i>                                                                          | <input type="checkbox"/> | <input type="checkbox"/> | <input type="checkbox"/>          | <input type="checkbox"/> | <input type="checkbox"/> |
| G10 | My supervisor recognises and praises good performance                                                                          | <input type="checkbox"/> | <input type="checkbox"/> | <input type="checkbox"/>          | <input type="checkbox"/> | <input type="checkbox"/> |
| G11 | My supervisor is always around checking on how I am working                                                                    | <input type="checkbox"/> | <input type="checkbox"/> | <input type="checkbox"/>          | <input type="checkbox"/> | <input type="checkbox"/> |

**CONFIDENTIAL**  
For research purposes only

September 2011

|     |                                                             | Strongly agree           | Agree                    | Neither agree nor disagree | Disagree                 | Strongly disagree        |
|-----|-------------------------------------------------------------|--------------------------|--------------------------|----------------------------|--------------------------|--------------------------|
| G12 | My supervisor decides and tells me what to do and how to do | <input type="checkbox"/> | <input type="checkbox"/> | <input type="checkbox"/>   | <input type="checkbox"/> | <input type="checkbox"/> |
| G13 | My supervisor finds fault in most of what I do              | <input type="checkbox"/> | <input type="checkbox"/> | <input type="checkbox"/>   | <input type="checkbox"/> | <input type="checkbox"/> |
| G14 | My supervisor and I both respect each other                 | <input type="checkbox"/> | <input type="checkbox"/> | <input type="checkbox"/>   | <input type="checkbox"/> | <input type="checkbox"/> |

**H. PLEASE TELL US ABOUT YOURSELF.**

|    |                                                     | Response                                                                                                                                                                                                                                                                                                                                                                                                                                                 |
|----|-----------------------------------------------------|----------------------------------------------------------------------------------------------------------------------------------------------------------------------------------------------------------------------------------------------------------------------------------------------------------------------------------------------------------------------------------------------------------------------------------------------------------|
| H1 | Sex                                                 | 1 <input type="checkbox"/> Male<br>2 <input type="checkbox"/> Female                                                                                                                                                                                                                                                                                                                                                                                     |
| H2 | Date of birth<br>DD/MM/YYYY<br>(eg. 26/12/2011)     |                                                                                                                                                                                                                                                                                                                                                                                                                                                          |
| H3 | In what type of locality did you go to high school? | 1 <input type="checkbox"/> Rural (Village/Hobli)<br>2 <input type="checkbox"/> Semi-rural (Taluka town)<br>3 <input type="checkbox"/> Semi-urban (District HQ excluding Bangalore, Mysore, Mangalore, Hubli-Dharwad, Tumkur and Belgaum)<br>4 <input type="checkbox"/> Urban except Bangalore (Mysore, Mangalore, Hubli-Dharwad, Tumkur and Belgaum)<br>5 <input type="checkbox"/> Bangalore<br>6 <input type="checkbox"/> Other place outside Karnataka |

**CONFIDENTIAL**  
For research purposes only

September 2011

|                                                                                           |     |                                                                 |                                                                                                                                                                                                                                                                                                                                                                 |
|-------------------------------------------------------------------------------------------|-----|-----------------------------------------------------------------|-----------------------------------------------------------------------------------------------------------------------------------------------------------------------------------------------------------------------------------------------------------------------------------------------------------------------------------------------------------------|
| 1<br>2<br>3<br>4<br>5<br>6<br>7<br>8<br>9<br>10<br>11<br>12<br>13<br>14<br>15<br>16<br>17 | H4  | Educational qualifications<br><b>(TICK AS MANY THAT APPLY)</b>  | 1 <input type="checkbox"/> MBBS<br>2 <input type="checkbox"/> PG medical degree (MD/MS, Diploma etc)<br>3 <input type="checkbox"/> Nursing degree (Bachelor/Diploma)<br>4 <input type="checkbox"/> Management degree (MBA/BBM or equivalent)<br>5 <input type="checkbox"/> Other graduate degree<br>6 <input type="checkbox"/> Other degree not mentioned above |
| 18<br>19<br>20<br>21<br>22                                                                | H5  | In case of MBBS, what type of medical college did you study in? | 1 <input type="checkbox"/> Private medical college<br>2 <input type="checkbox"/> Government medical college                                                                                                                                                                                                                                                     |
| 23<br>24<br>25                                                                            | H6  | Year of joining service                                         |                                                                                                                                                                                                                                                                                                                                                                 |
| 26<br>27<br>28<br>29                                                                      | H7  | How many years have you worked in this district?                | _____ Years                                                                                                                                                                                                                                                                                                                                                     |
| 30<br>31<br>32<br>33                                                                      | H8  | Type of employment (Presently)                                  | 1 <input type="checkbox"/> Permanent in this post<br>2 <input type="checkbox"/> Temporarily in-charge                                                                                                                                                                                                                                                           |
| 34<br>35<br>36<br>37<br>38                                                                | H9  | If holding any additional charge, mention which post            | <hr/> <input type="checkbox"/> No additional charge held                                                                                                                                                                                                                                                                                                        |
| 39<br>40<br>41<br>42                                                                      | H10 | Type of appointment                                             | 1 <input type="checkbox"/> Contract<br>2 <input type="checkbox"/> Regular                                                                                                                                                                                                                                                                                       |

**Thank you for your time and patience**

--

## Interview guide

Greetings and introduce

Explanation about the research

Consent for recording the interview.

- 1) As a \_\_\_\_\_(Designation)\_\_\_\_\_, what is your role in the PIP?

**Notes:** *This question should ideally provide information on knowledge of the interviewee about the PIP process under NRHM. It should also reveal the interviewee's perceived involvement in the PIP. If interviewee suggests minimum role, ask whether he thinks he should be involved. What prevented him from involving.*

- 2) How was the PIP for this year for your district prepared?

**Tags:** Can you explain the whole process from the beginning?

**Notes:** This question is the key question of the interview, which is expected to capture the role played by the interviewee in this year's PIP. Details of when the process began, what obstacles were met and how s/he went about the process needs to be captured. Also, the interviewee's perceptions about who were involved in the PIP, and their roles should emerge.

**Probes:** When did you start (Probe for communication from directorate)?

Who was involved and what was the nature of involvement? Also, according to you, have everybody been involved to the extent needed?

(Probe specifically for PHCs, VHSCs, ANMs, ASHAs, Anganwadi workers and people from other departments – primary education, women and child development if they are left out by the interviewee)

How did you begin the process of making the plan? Who took the lead within the district to make the plan?

**Tags:** Meetings, orientation, other communication, emails. Outcomes of these.

What were the difficulties you faced in the process of making PIP(Probe for orientation on involvement)

**Tags:** time constraints, lack of consensus, poor understanding on process by some, role conflicts

How did you feel about the process of making the PIP this year?

What do you feel about the PIP?

1  
2  
3  
4 3) Under NRHM according to guidelines, the district is supposed to involve  
5 communities right from village to the top administration in the district. What do you think of  
6 such a process?  
7

8 **Notes:** This question is expected to capture the attitudes of the interviewee to bottom-up  
9 planning, his perceptions about the feasibility of such a process and encourage the  
10 participant to reflect on how such a process can be implemented, if at all. If interviewee  
11 agrees flatly to such a process, we need to discuss what s/he means by “participation” and  
12 “involvement”. What is the extent of involvement of communities that they expect, if at all  
13 they do see a role. The interviewer adopts a tone that questions the need for bottom-up  
14 planning to bring out the attitudes towards this.  
15  
16

17  
18 **Probes:** Probe for feasibility in the district/area and attitudes towards involvement of  
19 various health staff and officials at all levels in planning in general.  
20  
21

22  
23 Is it necessary to involve communities right from village level? Does this help in making an  
24 effective plan?  
25

26  
27 Can you suggest a better approach to planning at district/taluka/PHC/village/area level?  
28  
29  
30  
31  
32  
33  
34  
35  
36  
37  
38  
39  
40  
41  
42  
43  
44  
45  
46  
47  
48  
49  
50  
51  
52  
53  
54  
55  
56  
57  
58  
59  
60





## How does capacity-building of health managers work? A realist evaluation study protocol

|                                 |                                                                                                                                                                                                                                                                                                                                                                                                                                                                                            |
|---------------------------------|--------------------------------------------------------------------------------------------------------------------------------------------------------------------------------------------------------------------------------------------------------------------------------------------------------------------------------------------------------------------------------------------------------------------------------------------------------------------------------------------|
| Journal:                        | <i>BMJ Open</i>                                                                                                                                                                                                                                                                                                                                                                                                                                                                            |
| Manuscript ID:                  | bmjopen-2012-000882.R1                                                                                                                                                                                                                                                                                                                                                                                                                                                                     |
| Article Type:                   | Protocol                                                                                                                                                                                                                                                                                                                                                                                                                                                                                   |
| Date Submitted by the Author:   | 08-Feb-2012                                                                                                                                                                                                                                                                                                                                                                                                                                                                                |
| Complete List of Authors:       | Prashanth, NS; Institute of Public Health, Marchal, Bruno; Institute of Tropical Medicine, Department of Public Health Hoeree, Tom; Institute of Tropical Medicine, Department of Public Health Narayanan, Devadasan; Institute of Public Health, Macq, Jean; Universit Catholique de Louvain, Institut de Recherche Sante et Societe<br>Kegels, Guy; Institute of Tropical Medicine, Department of Public Health Criel, Bart; Institute of Tropical Medicine, Department of Public Health |
| <b>Primary Subject Heading</b>: | Health services research                                                                                                                                                                                                                                                                                                                                                                                                                                                                   |
| Secondary Subject Heading:      | Public health, Research methods                                                                                                                                                                                                                                                                                                                                                                                                                                                            |
| Keywords:                       | Change management < HEALTH SERVICES ADMINISTRATION & MANAGEMENT, Human resource management < HEALTH SERVICES ADMINISTRATION & MANAGEMENT, Organisational development < HEALTH SERVICES ADMINISTRATION & MANAGEMENT                                                                                                                                                                                                                                                                         |
|                                 |                                                                                                                                                                                                                                                                                                                                                                                                                                                                                            |

SCHOLARONE™  
Manuscripts

only

## Abstract

### Introduction

There has been a lot of attention on the role of human resource management interventions to improve delivery of health services in low and middle income countries. However, studies on this subject are few due to limited research on implementation of programmes and methodological difficulties in conducting experimental studies on human resource interventions. We present the protocol of an evaluation of a district-level capacity-building intervention to identify the determinants of performance of health workers in managerial positions and to understand how changes.

### Methods and analysis

The aim of this study is to understand how capacity-building works. We will use realist evaluation to evaluate an intervention in Karnataka, India. The intervention is a capacity-building programme that seeks to improve management capacities of health managers at district and sub-district levels through periodic classroom-based teaching and mentoring support at the workplace.

We conducted interviews and reviewed literature on capacity building in health to draw out the programme theory of the intervention. Based on this, we formulated hypothetical pathways connecting the expected outcomes of the intervention (planning and supervision) to the inputs (contact classes and mentoring). We prepared a questionnaire to assess elements of the programme theory - organisational culture, self-efficacy and supervision. We shall conduct a survey among health managers as well as collect qualitative data through interviews with participants and non-participants selected purposively based on their planning and supervision

1  
2  
3 performance. We will construct explanations in the form of context-mechanism-  
4  
5 outcome configurations from the results. This will be iterative and we will use a  
6  
7 realist evaluation framework to refine the explanatory theories that are based on the  
8  
9 findings to explain and validate an improved theory on “what works for whom and  
10  
11 under what conditions”.

## 12 13 14 15 16 Discussion

17  
18 The scope for applying realist evaluation to study human resource management  
19  
20 interventions in health are discussed.  
21  
22  
23  
24

## 25 26 Introduction

27  
28 Health worker availability has been associated with better coverage of programmes  
29  
30 such as vaccination as well as better outcomes such as reduced child and maternal  
31  
32 mortality [1, 2]. Although the relationship between availability of health service  
33  
34 providers and improved mortality outcomes appears straightforward, it is not easy to  
35  
36 establish. Issues of health worker performance and their motivation and the contextual  
37  
38 factors that shape an enabling environment for health service providers to perform  
39  
40 effectively continue to be poorly understood [3]. Early studies exploring associations  
41  
42 between health worker availability and health outcomes reported results ranging from  
43  
44 “no significant association with infant mortality” to positive associations with infant  
45  
46 and maternal mortality and even surprisingly, in one study, an adverse association  
47  
48 between doctor availability and infant and perinatal mortality, termed ‘doctor  
49  
50 anomaly’ [4–6]. Using improved data and design, more recent cross-country  
51  
52 regression-based analysis has shown a positive relation between health worker  
53  
54  
55  
56  
57  
58  
59  
60

1  
2  
3 availability and reduced child and maternal mortality, and improved vaccination  
4 coverage [7, 8].  
5  
6  
7

8 The 2006 World Health Report drew attention to the human element in the delivery of  
9 health care services by focussing on the health workforce. It identified the forces  
10 driving the health workforce (health needs, health systems and contextual factors),  
11 and the related workforce challenges (numbers, skill mix, distribution and working  
12 conditions) [9]. A well-performing workforce is considered to be a combination of  
13 staff being available (retained and present) and staff being competent (productive and  
14 responsive) [9]. In order to ensure such conditions, the report suggested policymakers  
15 to adopt *good* human resource management (HRM) within the health services. Human  
16 resources management (HRM) is the management of people in an organisation. It  
17 includes the policies, practices and activities at the disposal of managers to ensure the  
18 availability of staff in their number, with skills needed to discharge their functions  
19 and having the motivation to accomplish the organisation's objectives [10].  
20  
21  
22  
23  
24  
25  
26  
27  
28  
29  
30  
31  
32  
33  
34  
35

36 Sub-optimal performance of health workers is a serious issue requiring urgent  
37 attention as it is linked to morbidity and mortality, and reviews having shown that  
38 health worker performance is critical to achieving good health outcomes across health  
39 conditions, age groups and to achieve the health-related millennium development  
40 goals [11, 12]. The world health report suggested four “practical and low-cost  
41 instruments” of which supportive, yet firm supervision and lifelong learning are  
42 important for a competent and responsive health workforce.  
43  
44  
45  
46  
47  
48  
49  
50  
51

52 However, the difference made by *good* HRM in achieving better performance and  
53 outcomes of health services is poorly researched. There are serious knowledge and  
54 evidence gaps on what kinds of interventions work. This is mainly due to  
55  
56  
57  
58  
59  
60

1  
2  
3 methodological challenges on measuring HRM practices and performance, and the  
4  
5 paucity of studies on district level interventions on health workforce from low and  
6  
7 middle income countries, where the need for such evidence is most pressing [3, 12].

8  
9  
10 On the other hand, several reviews highlight the need for evaluations that can improve  
11  
12 our understanding of “how” such interventions work so that HRM interventions may  
13  
14 be better designed and implemented [1, 3, 13]. Despite the relevance of this question  
15  
16 to policymakers as well as health care organisation managers, there are few  
17  
18 studies[14].  
19

20  
21  
22 HRM interventions are implemented within existing health systems. Context matters:  
23  
24 what works in one setting does not necessarily work in another setting in the same  
25  
26 country and may perhaps even not work in the same setting at another moment in  
27  
28 time. Evidence on effectiveness of HRM interventions is either scanty or flawed due  
29  
30 to poorly designed research [15].  
31

32  
33 Experience from action research in capacity building initiatives in 25 of the (then) 28  
34  
35 Indian states as well as performance reviews of the Indian government’s flagship  
36  
37 health programme, National Rural Health Mission (NRHM) highlight the need for  
38  
39 systemic capacity-building on one hand and scientific evaluations of how  
40  
41 interventions work (or do not) on the other [16–18]. Paul et al. reviewed several  
42  
43 studies at both national and local level to identify gaps in the Indian health care  
44  
45 system; they recommend (among others) “...interventions and research to improve  
46  
47 decentralised district-level planning in health services”. Given the lack of institutional  
48  
49 capacity to utilise financial or technical inputs especially at the district level,  
50  
51 increased health spending even on appropriate services may not lead to actual  
52  
53 provision of services [19]. Our study intends to address the evidence gap (how do  
54  
55  
56  
57  
58  
59  
60

1  
2  
3 district level training interventions improve performance?) and will contribute to the  
4  
5 evidence base for better design of health workforce interventions.  
6  
7

8  
9 In this paper, we present the protocol of an evaluation of a district-level capacity-  
10  
11 building intervention in Karnataka State (India) that aims at responding to the  
12  
13 effectiveness question, but also to the causality question. Inspired by principles of  
14  
15 realist evaluation, this study focuses on identifying the determinants of performance  
16  
17 of health workers in managerial positions, and to understand how changes are brought  
18  
19 about.  
20

21  
22 The capacity-building intervention we assess aims to improve the capacity of health  
23  
24 managers to conduct the planning and supervision of health services. These managers  
25  
26 are posted at district and sub-district (*taluka*) levels (a *taluka* is an administrative sub-  
27  
28 division of a district, with population ranging from 100,000 to 200,000). It does so by  
29  
30 combining classroom-based lectures with in-service ‘mentoring’, where trainers and  
31  
32 faculty visit participants in their workplace to further build on the classroom teaching  
33  
34 and help participants apply the teaching in their working environment.  
35  
36  
37  
38  
39

## 40 **Methods**

### 41 *Aim*

42  
43 We will carry out an evaluation study of a capacity-building intervention at district  
44  
45 level in Karnataka state (figure 1). The aim of the study is to understand how capacity  
46  
47 building in district health management works. This study will first describe the  
48  
49 structure and nature of the intervention and, second, design tools to determine  
50  
51 whether and how it brought about the changes that it sought to bring about and  
52  
53 through what mechanisms these changes were achieved.  
54  
55  
56  
57

58 **Figure 1** Map of India showing Karnataka state (shaded red) in south India  
59  
60

1  
2  
3  
4  
5  
6  
7  
8  
9  
10  
11  
12  
13  
14  
15  
16  
17  
18  
19  
20  
21  
22  
23  
24  
25  
26  
27  
28  
29  
30  
31  
32  
33

### *Study objectives*

1. To determine if a district level capacity-building programme is associated with improvement of planning and supervision practices in Tumkur district, Karnataka state
2. To identify and describe the plausible mechanisms for changes in planning and supervision practices, if any
3. To develop recommendations for better design and implementation of capacity-building interventions for health services managers in Karnataka
4. To contribute to the development of a methodological framework for the scientific evaluation of complex HRM interventions at local health care system level

### *Research question*

34  
35  
36  
37  
38  
39  
40  
41  
42  
43  
44

Based on these objectives, we framed the following research questions (one main question with three sub-questions) to be addressed in the study as follows:

“How does a training programme for health managers at district level that consists of contact classes and mentoring have an impact on their planning and supervision practices?”

1. What are the interventions’ elements that are associated with improvement of planning and supervision practices?
  2. Was there an association between greater participation in the intervention (classroom training and mentoring) and improved planning and/or supervision practices?
- 45  
46  
47  
48  
49  
50  
51  
52  
53  
54  
55  
56  
57  
58  
59  
60

- 1  
2  
3 3. How might a training programme change management practices of health  
4 managers with respect to the preparation of annual plans and supportive  
5 supervision?  
6  
7  
8  
9

10  
11  
12 *Setting*

13  
14 The study will be conducted in two districts (i.e. local health care system) of the state  
15 of Karnataka in India (figure 2). Karnataka is one of the average-performance states  
16 in India with respect to health outcomes – the ‘average’ is concealing wide disparities  
17 between districts. For instance, in 2008, coverage of immunisation for children was  
18 over 90% in Kodagu district, while it was below 50% in Raichur district [20]. The  
19 study will take place in Tumkur and Raichur district. Of the 30 districts in Karnataka,  
20 Tumkur is the fourth largest in terms of population (total population - 2,681,449  
21 people) and the third largest district in Karnataka in terms of size (total area - 10,597  
22 sq. km) with only 20% urban population and at least half the population recognised as  
23 being below the poverty line [21, 22]. The district has 10 *talukas*. In view of its large  
24 size, average socio-economic indices and ‘average’ health performance in terms of its  
25 outcomes, Tumkur could be considered a typical district of Karnataka. The  
26 government classifies Raichur district in northern Karnataka as having several *talukas*  
27 that are ‘backward’, but it ranked 14th among the (then) 27 districts in terms of health  
28 indicators. On the same index, Tumkur was ranked ninth [23]. These two districts are  
29 purposively selected, as they are roughly comparable to each other in terms of health  
30 management and outcomes.  
31  
32  
33  
34  
35  
36  
37  
38  
39  
40  
41  
42  
43  
44  
45  
46  
47  
48  
49  
50

51 **Figure 2** Map of Karnataka state showing Tumkur district (shaded blue) and Raichur  
52 district (shaded green)  
53  
54  
55  
56  
57  
58  
59  
60



### *The intervention*

In 2009, Tumkur district was chosen to pilot a capacity-building programme. The programme was implemented by a consortium, *Swasthya Karnataka* consisting of five Indian non-governmental organisations, in partnership with the government of Karnataka (see figure 3 for structure of the capacity-building programme, key actors involved and timeline). The programme consists of 12 modules on public health management topics, delivered through classroom teaching for two or three days per month in a residential training programme for all staff involved in management of health services at taluka and district levels, along with mentoring of these participants on a monthly basis at their workplace. One of the main objectives of the intervention was to improve planning and supervision practices of health managers through providing knowledge of public health planning principles, improving their skills in planning and supervision as well as bringing about a *can-do* attitude towards organisational change. The programme began in August 2009; the monthly contact classes for health managers ended in January 2011 and mentoring is in progress as of December 2011.

**Figure 3** Schematic showing the structure of the capacity-building intervention in Tumkur along with key actors and timeline

### *Study design*

Marchal [24] reviewed the methodological debate around the use of (quasi-) experimental study designs in complex interventions and scientific evaluations in health systems research. He builds a case for using the realist evaluation approach in research on complex interventions in health systems. He presents the results of a

1  
2  
3 realist evaluation of the role of workforce management in well-performing health care  
4  
5 organisations and identified some mechanisms underlying the better performance of  
6  
7 these well-performing hospitals [24]. In line with this approach, we will carry out a  
8  
9 realist evaluation of the capacity-building programme in Tumkur, using a mix of  
10  
11 quantitative and qualitative methods. The characteristics of the intervention that  
12  
13 support the choice of realist evaluation are presented in the discussion (see below).  
14  
15

16  
17  
18 Our study design is determined by the following considerations:  
19

- 20  
21 1. Classical controlled (quasi-) experimental designs are limited to answering  
22  
23 *whether* a particular intervention (usually measured as treatment variables)  
24  
25 was associated with an observed pre-defined outcome. They do not answer the  
26  
27 questions *how*, *why*, and *under what conditions* the intervention worked (or  
28  
29 did not). Besides enabling an understanding of the changes in planning and  
30  
31 supervision practices in course of the intervention, the study design should  
32  
33 also generate valid explanations for why and how the results observed were  
34  
35 achieved.  
36  
37
- 38  
39 2. HRM interventions are implemented in existing health system settings. Hence,  
40  
41 the researcher cannot *manipulate* all treatment variables for the purposes of  
42  
43 testing *a priori* hypotheses, either because the context of the intervention does  
44  
45 not support this or for ethical reasons. Although hypothesis testing should be  
46  
47 central to discovery of the mechanisms, such hypotheses should be derived  
48  
49 from the possibilities permitted by the context within which the intervention is  
50  
51 being implemented.  
52  
53  
54  
55  
56  
57  
58  
59  
60

1  
2  
3 In order to understand whether, and how the intervention produces a change in  
4 managerial practices at the district level, we will carry out the study in six steps. In  
5 figure 4, a schematic shows the sequence of steps (steps A, B1-2, C, D, E and F) with  
6 the questions that will be addressed at each step and the corresponding methods.  
7  
8 The various phases of our study design follow the logic presented in the six-step  
9 framework developed by Van Belle et al [25]. The six steps they describe refer to a  
10 theory-driven evaluation where evaluators reconstruct the assumptions based on  
11 which the programme was designed (programme theory) in order to *refine* it through  
12 *testing* and verifying. Based on this process, an improved programme theory is  
13 developed, which explains how the intervention and outcome are related. Realist  
14 evaluation is a type of theory-driven evaluation [26] that generates a theory  
15 explaining the mechanisms through which the outcomes were brought about in a  
16 given context. We found the steps used by Van Belle et al. useful to organise and  
17 describe the steps in this study. The steps A-F below refer to the steps in our design as  
18 shown in figure 4; the six steps of Van Belle et al. are referred to as numbers (steps 1-  
19 6; see figure 5). The scope of the evaluation and appropriateness of realist evaluation  
20 (corresponding to step 1 of Van Belle framework) is presented in the Discussion  
21 section (see below).  
22  
23  
24  
25  
26  
27  
28  
29  
30  
31  
32  
33  
34  
35  
36  
37  
38  
39  
40  
41  
42  
43  
44

45 **Figure 4** Study design showing steps A to F

46  
47 **Figure 5** Six steps proposed by Van Belle and colleagues [21]  
48  
49  
50  
51

52 The study starts with a reconstruction of the initial programme theory of the  
53 intervention (step A in figure 4) corresponding to steps 1 and 2 of the Van Belle  
54 framework. A *programme theory* that may be presented in the form of a *logic model*  
55  
56  
57  
58  
59  
60

1  
2  
3 is a reconstruction of the assumptions and steps through which the intervention is  
4 expected to reach the expected outcomes. An initial programme theory will be the  
5 starting point for the study by providing a basis for the questions and tools of the  
6 subsequent qualitative and quantitative data collection phases. In figure 6, a simplified  
7 hypothetical causal chain based on the programme theory is presented. It links the  
8 intervention inputs (contact classes and mentoring) to the expected outputs (improved  
9 planning and supervision practices).  
10  
11  
12  
13  
14  
15  
16  
17  
18  
19

20  
21 **Figure 6** Hypothetical pathways to change based on initial reconstruction of  
22 programme theory and literature  
23  
24  
25  
26

27  
28 In steps B and C, we will use a mix of qualitative and quantitative methods to  
29 understand the process of planning and supervision and whether and how it changed  
30 in the course of the intervention[27]. In step B, we will measure perceptions about  
31 training, planning and supervision, organizational commitment, self-efficacy in  
32 problem-solving and nature of supervision among participants and non-participants  
33 through a survey in Raichur and Tumkur districts of Karnataka. Organisational  
34 change in health services is an outcome of individual, institutional and contextual  
35 factors. Existing theories of behavioural change in health services conceptualise that  
36 interventions operate at one or more of these three spheres of influence (figure 7).  
37  
38  
39  
40  
41  
42  
43  
44  
45  
46  
47  
48

49  
50 **Figure 7** Theories of behavioural change in health services in relation to their sphere  
51 of influence  
52  
53  
54  
55  
56  
57  
58  
59  
60

1  
2  
3 A hypothetical causal pathway (figure 6) that links the intervention inputs and the  
4  
5 outputs, and a review of literature (figure 7) on what we know about HRM  
6  
7 interventions were used to choose the variables and design the tools for the survey.  
8  
9

10  
11 In step C, we will use qualitative methods to document and understand the changes in  
12  
13 planning and supervision practices before, during and after the intervention in  
14  
15 Tumkur district. In this phase, we will also determine the contextual factors that  
16  
17 influence planning and supervision in the district, especially other programmes  
18  
19 initiated by the state health authorities that have similar or overlapping objectives  
20  
21 with the intervention. The National Rural Health Mission (NRHM) is a nation-wide  
22  
23 initiative of the Indian government that seeks to improve district level planning and  
24  
25 supervision and implements this through the creation of a district and taluka  
26  
27 programme management unit. NRHM introduced technical and human resource  
28  
29 inputs into the health system in the form of decentralised annual action plans and  
30  
31 placement of young management professionals at taluka and district levels for  
32  
33 planning and supervision of the plans.  
34  
35  
36  
37  
38  
39

40  
41 The data from steps B and C will be analysed and interpreted together in step D to  
42  
43 understand the relationships between the elements of the initial hypothetical causal  
44  
45 chain. This will result in an improved theory linking the inputs, intermediate steps and  
46  
47 the effect of contextual factors. We will then formulate – in step E – explanatory  
48  
49 context-mechanism-outcome configurations based on the interpretation in step D that  
50  
51 will be validated through a fresh round of data collection using qualitative methods.  
52  
53 An iterative analysis of findings from steps C, D and E will be conducted so as to  
54  
55 build an internally consistent and valid explanation in step F on “what elements of the  
56  
57  
58  
59  
60

intervention worked, for whom and under what conditions". The last three steps in our study (steps D, E and F) correspond to the last three steps of the Van Belle framework.

### *Methods and tools*

Realist evaluation is method-neutral; it allows for the use of mixed methods, whereby the choice of data collection and analysis methods is determined by the nature of the research questions and of the programme theory [28]. The methods and tools for data collection are determined by each step (qualitative or quantitative) and the nature of questions asked at this step (see schematic in figure 4). A summary of the tools and expected outcomes at each step is shown in Table 1.

**Table 1: Details of the tools, sampling and expected outcomes**

| Step                                                        | Methods/tools                                                                                                                                                                                                                     | Sampling/selection of respondents                                                                                                          | Analysis and expected outcome                                                                                                                                                                                                                                                                        |
|-------------------------------------------------------------|-----------------------------------------------------------------------------------------------------------------------------------------------------------------------------------------------------------------------------------|--------------------------------------------------------------------------------------------------------------------------------------------|------------------------------------------------------------------------------------------------------------------------------------------------------------------------------------------------------------------------------------------------------------------------------------------------------|
| Step A<br>Reconstruction of programme theory                | Desk review of intervention design, proposal, annual district level plans, reports and interviews with the people who designed and are implementing the intervention. Review of theories of behavioural change in health services | Not applicable for review of documents; purposive sampling for interviews                                                                  | - Initial programme theory and a hypothetical causal pathway linking intervention inputs and expected outcomes<br>- Summary of theories of organisational change in relation to their spheres of influence                                                                                           |
| Steps B1 and B2<br>Data collection – quantitative (process) | Construct survey questionnaire based on a review of theories of behavioural change in health care organisations and reconstruction of initial programme theory from step A                                                        | All health managers in intervention and control district who agree to participate (about 100 in all; about 60 in Tumkur and 40 in Raichur) | Key outcome variables for survey<br>- Attitudes to training programmes and district planning<br>- Organisational commitment<br>- Self-efficacy<br>- Attitude towards receiving and providing supervision<br>Statistical analysis to determine relationship among variables and effect of exposure to |

|                                                                      |                                                                                                                                                                                                                                                                                              |                                                                                                      | intervention                                                                                                                                                                                                                           |
|----------------------------------------------------------------------|----------------------------------------------------------------------------------------------------------------------------------------------------------------------------------------------------------------------------------------------------------------------------------------------|------------------------------------------------------------------------------------------------------|----------------------------------------------------------------------------------------------------------------------------------------------------------------------------------------------------------------------------------------|
| Step C<br>Data collection –<br>qualitative (context and<br>outcomes) | Assess action plans<br>before, during and after<br>intervention; assess<br>performance and<br>outcomes using routine<br>institutional data and<br>interview participants<br>and non-participants at<br>district and taluka level<br>to understand changes<br>in the course of three<br>years | Purposive, based on<br>exposure to<br>intervention                                                   | Analysis of the<br>qualitative data to<br>understand how<br>planning and<br>supervision practices<br>changed in the course<br>of the intervention as<br>well as how other<br>contextual<br>determinants<br>influenced these<br>changes |
| Step D<br>Analysis (context-<br>mechanism-outcome<br>configurations) | Analyse findings from<br>B2 and C to understand<br>the relationship<br>between various<br>elements in the<br>hypothetical causal<br>chain and the<br>contribution of<br>contextual factors to<br>the outcomes observed                                                                       | Desk review and joint<br>analysis of findings                                                        | Further refining of the<br>initial programme<br>theory by the improved<br>understanding from the<br>application of<br>qualitative and<br>quantitative methods                                                                          |
| Steps E & F<br>(Validation and<br>refining the theory)               | Formulate context-<br>mechanism-outcome<br>configurations and<br>verify through fresh<br>data collection as well<br>as re-looking at the<br>earlier findings (steps<br>B2 and C)                                                                                                             | Purposive sampling of<br>participant and non-<br>participant health<br>managers in both<br>districts | An internally consistent<br>and valid explanation<br>of “what components<br>of the intervention<br>worked, for whom and<br>under what conditions”                                                                                      |

The questionnaire used in the survey (step B) includes six modules (modules B to G in supplementary file 1) to measure attitude towards planning and training programmes, organisational commitment, self-efficacy and supportive nature of supervision. The module on organisational commitment (module C in supplementary file 1) is adapted from two versions of the Meyer and Allen organisational commitment questionnaire that have been tested and validated in public services in south Asian settings [29–31]. A five-point Likert scale is used to grade responses. Self-efficacy in managing conflict situations usually faced by managers of health services is measured with a ten-item scale based on the Bandura scale[32] that was developed for use across cultures and has been demonstrated to have cross-cultural equivalence across several languages [33–36]. The supportive nature of supervision is

1  
2  
3 measured using 14 items on a five-point Likert scale. We adopted eight items that  
4  
5 measure supportive supervision and four items measuring non-controlling supervision  
6  
7 from Oldham and Cummings, which in turn is based on the Michigan organizational  
8  
9 assessment package [37, 38]. We added two items to measure controlling supervision.  
10  
11 The questionnaire will be piloted among public health experts and *taluka*-level health  
12  
13 managers. The pilot will be used to improve the understandability of the questions  
14  
15 because some of the tools have not been tested earlier among south Indian health  
16  
17 services staff. Exposure of participants to the intervention, type of participation and  
18  
19 their performance during and immediately after the training programme and  
20  
21 mentoring will be captured through analysis of secondary data from attendance  
22  
23 records, monthly reports of the training programme and visit notes by mentors.  
24  
25  
26  
27  
28

29  
30 In step C, we will conduct document review, compile routine health information data  
31  
32 on performance, conduct interviews using a semi-structured interview guide  
33  
34 (supplementary file 2) and undertake non-participant observation.  
35  
36  
37

### 38 *Sampling*

39  
40 The survey (step B) will be conducted among all health managers in the district. For  
41  
42 the purpose of this study, a health manager is defined as a health worker in the  
43  
44 government services, who is managing a facility, team or institutions at the *taluka* or  
45  
46 district level. The questionnaire will be administered among the health managers in  
47  
48 the two study districts, Tumkur and Raichur. They will be invited to participate  
49  
50 voluntarily in the study. The first author (NSP) or one of two trained data collectors  
51  
52 will visit the health managers their place of work after obtaining an appointment at a  
53  
54 time convenient to them to ensure good recruitment. The data collectors will be  
55  
56  
57  
58  
59  
60



1  
2  
3 trained to answer questions about the questionnaire and the nature of the study, as  
4  
5 well as to clarify doubts arising in the course of filling the questionnaire.  
6  
7

8  
9  
10 In steps C and E, we will carry out purposive sampling; in step C, we will choose  
11 respondents for interviews in order to interview people ranging from no exposure to  
12 the intervention to people who have participated most in the intervention. In step E,  
13 data collection will be done through participant observation and will be iterative in  
14 nature. It will be based on the findings of steps B2 and C. We shall select participant  
15 health managers purposively in Tumkur district as well as non-participant health  
16 managers with similar outcomes from Raichur district to understand which ones  
17 among them achieved organisational change and to what extent this was facilitated (or  
18 not) by the capacity-building programme or individual, systemic or contextual factors  
19 (see figure 7).  
20  
21  
22  
23  
24  
25  
26  
27  
28  
29  
30  
31  
32  
33

### 34 *Analysis*

35  
36 The quantitative data from the questionnaire will be examined (step B2) and  
37 descriptive parametric measures for organisational commitment, self-efficacy and  
38 nature of supervision will be calculated. Participation in training and mentoring  
39 (exposure) among the health managers in Tumkur district will be measured through  
40 secondary documents (attendance and mentoring notes). We will apply statistical tests  
41 of differences between groups to determine the degree of association between  
42 exposure to training and the measures of organisational commitment, self-efficacy  
43 and nature of supervision.  
44  
45  
46  
47  
48  
49  
50  
51  
52  
53  
54  
55  
56  
57  
58  
59  
60

1  
2  
3 We will analyse interview transcripts (step C) using content analysis to understand the  
4 process of planning at district and *taluka* levels. We will use triangulation by  
5 systematically sorting through the qualitative data from the observation notes,  
6 interviews and secondary document analysis to find common themes or categories by  
7 eliminating overlapping areas.  
8  
9  
10  
11  
12

13  
14  
15  
16 The results of the qualitative and quantitative phases will then be analysed together  
17 (step D) to develop plausible explanatory context-mechanism-outcome configurations  
18 that explain who performs better with respect to planning and supervision in response  
19 to a training-mentoring programme in a district. The result from the analysis of  
20 participant observation field notes (step E) will be used to validate this framework and  
21 refine the initial programme theory. This phase of joint quantitative and qualitative  
22 analysis will be iterative – we will refine the framework through purposive participant  
23 observation visits and interviews. By taking into consideration the context within  
24 which a given outcome was observed, and testing and validating explanatory  
25 configurations of these three (context, mechanism and outcome), we will explain how  
26 the intervention brought about the changes observed in planning and supervision  
27 practices.  
28  
29  
30  
31  
32  
33  
34  
35  
36  
37  
38  
39  
40  
41  
42  
43  
44

#### 45 *Ethics*

46  
47 The protocol of this study was approved by the Institutional Review Board of the  
48 Institute of Tropical Medicine, Antwerp and by the Institutional Ethics Committee of  
49 Institute of Public Health, Bangalore.  
50  
51  
52  
53  
54  
55  
56  
57  
58  
59  
60

1  
2  
3 All participants shall be made aware of their participation in the study through formal  
4 correspondence. They will have the option to decline participation in the study, and it  
5 will be ensured that non-participation will not affect further participation in the  
6 training programme. In addition, written consent shall be obtained for each interview.  
7  
8 The study proposal shall be shared with the state health authority and permission shall  
9 be sought to access routine health data, reporting formats and meeting proceedings.  
10  
11  
12  
13  
14  
15  
16  
17  
18  
19

20 Questionnaires and interview transcripts shall be coded to ensure confidentiality of all  
21 ideas/opinions expressed by participants in the course of the study. None of the study  
22 outcomes shall identify participants by name or exact designation to avoid potential  
23 professional or personal harm to the participants in view of opinions/ideas expressed  
24 by them.  
25  
26  
27  
28  
29  
30  
31

32 The language of interaction with participants will be either English or Kannada (the  
33 local language in the state of Karnataka) in function of their preference; this would be  
34 established at the beginning of the interaction. Consent forms shall be made available  
35 in both English and Kannada (supplementary files 3 and 4) and the participant will  
36 have a choice to read and understand the nature of study in the language of their  
37 choice and decide accordingly. The content shall also be orally explained to the  
38 participant by the trained data collector in the case of the self-administered  
39 questionnaire and the interviewer in the case of interviews. All interviews shall be  
40 conducted at a time and venue indicated by the participant with prior appointment.  
41  
42  
43  
44  
45  
46  
47  
48  
49  
50  
51  
52 The approval for audio recording of interviews shall be sought separately in addition  
53 to the consent for taking notes of the interview.  
54  
55  
56  
57  
58  
59  
60

1  
2  
3 The participant shall have the right to revoke or withdraw consent to part or all of  
4 what he has expressed during the study period. In case of collection of any document  
5 outside of public domain (for example privileged communication between district  
6 authorities), a permission letter shall be obtained from the authorised official.  
7  
8  
9  
10

11  
12  
13  
14 There is no interaction with patients in the course of the study.  
15  
16

### 17 18 *Quality control*

19  
20 All the data from the qualitative data collection methods will be organised on Nvivo  
21 software with clear documentation of the procedures adopted and consistent file  
22 naming. Analysis of the interview transcripts, categorisation and analysis will be  
23 crosschecked by two researchers.  
24  
25  
26  
27  
28  
29

30  
31 For each survey respondent, the data collector will check the questionnaire for  
32 completeness. Before data entry, a member of the study team will scan all  
33 questionnaires for errors. The data will be entered into a spreadsheet using a software  
34 for programmed data entry (Epidata) with in-built validity checks and error detection  
35 (supplementary file 5)[39].  
36  
37  
38  
39  
40  
41  
42  
43  
44  
45

## 46 **Discussion**

47  
48 HRM interventions at the district level are complex; the outputs are produced as a  
49 result of interactions between several actors and institutions within a given context  
50 resulting in a web of processes, which are difficult to map in a straightforward, linear  
51 manner. It is being increasingly recognised that such interventions present a  
52  
53  
54  
55  
56  
57  
58  
59  
60

1  
2  
3 methodological challenge [40, 41]. This study intends to improve our understanding  
4  
5 of scientific evaluation of complex interventions in HRM in health. The capacity-  
6  
7 building programme in Tumkur has all the features of a complex intervention as  
8  
9 described by the new guidance of the Medical Research Council (MRC) on  
10  
11 developing and evaluating complex interventions. The guidance lists some  
12  
13 dimensions of complexity – “the number of and interactions between components  
14  
15 within the experimental and control interventions (if identified), number and difficulty  
16  
17 of behaviours required by those delivering or receiving the intervention, number of  
18  
19 groups or organisational levels targeted by the intervention, number and variability of  
20  
21 outcomes and degree of flexibility or tailoring of the intervention permitted”. The  
22  
23 latest 2008 guidance of MRC, while acknowledging the limitations of experimental  
24  
25 designs, notes that inclusion of a process evaluation in complex interventions “is a  
26  
27 good investment to explain discrepancies between expected and observed outcomes,  
28  
29 to understand how context influences outcomes, and to provide insights to aid  
30  
31 implementation”. The recent guidance builds on the experience gained in  
32  
33 understanding the limitations of the earlier experimental designs and suggests the use  
34  
35 of a “more flexible, and less linear model of the process, giving due weight to the  
36  
37 development and implementation phases, as well as to evaluation” [42]. This is  
38  
39 further reinforced by Campbell et al. [40] who emphasise the need to use a mix of  
40  
41 qualitative and quantitative evidence that needs to be applied to an (often) iterative  
42  
43 process of framework development and testing.  
44  
45  
46  
47  
48  
49  
50  
51

#### 52 *Realist evaluation of HRM interventions*

53  
54 Conduct of trial-based studies in social systems has limitations in view of the lack of  
55  
56 ‘control’ over the contextual and operational factors that affect the observations.  
57  
58  
59  
60

1  
2  
3 Although a potentially verifiable causal chain that connects an intervention and a  
4  
5 hypothesised outcome linked together through sequential steps is often appropriate for  
6  
7 scientific evaluation, the responses of social systems to new approaches are very often  
8  
9 difficult to ‘reduce’ to such a testable succession of steps with cause-effect  
10  
11 relationships [25, 26, 43]. Increasingly, social programme evaluations have been  
12  
13 encouraged to look beyond the “successionist” format of experimental design that is  
14  
15 well suited for classical bio-medical research. At the first WHO health systems  
16  
17 research symposium at Montreux in 2010, a strong call was made to strengthen the  
18  
19 evidence base for capacity development through “proper evaluation of capacity  
20  
21 development initiatives” and use of multi-method approaches to overcome the  
22  
23 difficulties imposed by the complexity of human resources in health interventions [44,  
24  
25 45]. Realist evaluation precisely posits that programmes are embedded in social  
26  
27 systems and stresses the importance of understanding *what works for whom and*  
28  
29 *under what conditions*. It offers a framework to design scientific evaluations of  
30  
31 human resource interventions. Based on a review of literature on choice of methods  
32  
33 for complex interventions, Marchal [24] reports that experimental or quasi-  
34  
35 experimental designs “are indicated when the effectiveness of an intervention should  
36  
37 be tested” and are by themselves inadequate to answer and explain how interventions  
38  
39 work, an analysis supported by several other reviews [40, 43, 46].  
40  
41  
42  
43  
44  
45

46  
47 Health worker practices are complex behaviours that are determined by various  
48  
49 individual, systemic or institutional and contextual factors [12]. In their review of  
50  
51 theories of behavioural change in health services, Rowe et al. [12] question the  
52  
53 premise that poor organisational performance in health is merely due to the lack of  
54  
55 knowledge and skills. They encourage studies to move beyond the old paradigm “that  
56  
57  
58  
59  
60

1  
2  
3 most performance problems can be solved by training alone”. In the Tumkur capacity-  
4 building intervention, a reconstruction of the assumptions of the intervention and how  
5 it sought to change planning and supervision practices is established. The outcomes  
6 (i.e. better planning and supervision practices) are determined by several factors at the  
7 individual (improved knowledge and skills), institutional (competence, enabling  
8 environment, motivation to apply/change) and contextual (other programmes or  
9 interventions with similar objectives and many other contextual factors that may  
10 facilitate or discourage organisational change) levels. In order to understand *how* the  
11 programme worked, we will further build and refine these hypothetical pathways  
12 based on a review of literature and the study findings to arrive at context-mechanism-  
13 outcome configurations.  
14  
15  
16  
17  
18  
19  
20  
21  
22  
23  
24  
25  
26  
27  
28  
29

30 Realist evaluation presents a scientific approach towards understanding mechanisms  
31 through which social interventions work. According to Pawson and Tilley [47],  
32 “Programs work (have successful ‘outcomes’) only insofar as they introduce the  
33 appropriate ideas and opportunities (‘mechanisms’) to groups in the appropriate social  
34 and cultural conditions (‘contexts’)”. By building and testing such Context (C)-  
35 Mechanism (M)-Outcome (O) or CMO configurations within the *talukas*, it is  
36 possible to generate an internally consistent and externally valid knowledge of how  
37 such interventions work in a given context to produce an observed outcome [26].  
38  
39  
40  
41  
42  
43  
44  
45  
46  
47  
48

49 Existing theories on behavioural change in health services can be divided into those  
50 that explain change at or between individual, institutional or contextual levels, and  
51 thus evaluations must consider all these levels while trying to explain behavioural  
52 change (figure 7). The variables we chose to measure (attitude towards training,  
53  
54  
55  
56  
57  
58  
59  
60

1  
2  
3 organisational commitment, self-efficacy, nature of supervision) have all been linked  
4  
5 to behavioural change and improvement in organisations and a preliminary desk  
6  
7 review of the training reports and documents suggests that these are also linked to the  
8  
9 intervention in Tumkur.  
10  
11  
12  
13  
14  
15  
16  
17  
18  
19  
20  
21  
22  
23  
24  
25  
26  
27  
28  
29  
30  
31  
32  
33  
34  
35  
36  
37

### 38 References

- 39  
40  
41  
42 1. Haines A, Kuruville S, Borchert M: **Bridging the implementation gap between**  
43 **knowledge and action for health.** *Bulletin of the World Health Organization* 2004,  
44 **82:724-31**  
45  
46 2. Speybroeck N, Kinfu Y, Dal Poz MR, Evans DB: **Reassessing the relationship**  
47 **between human resources for health, intervention coverage and health outcomes.**  
48 *Background papers for The World Health Report* 2006.  
49  
50 3. Dieleman M, Gerretsen B, Wilt GJ van der: **Human resource management**  
51 **interventions to improve health workers' performance in low and middle income**  
52 **countries: a realist review.** *Health research policy and systems* 2009, **7:7.**  
53  
54 4. Kim K, Moody PM: **More resources better health? A cross-national**  
55 **perspective.** *Social Science & Medicine* 1992, **34:837-42.**  
56  
57  
58  
59  
60



- 1  
2  
3 5. Hertz E: **Social and environmental factors and life expectancy, infant**  
4 **mortality, and maternal mortality rates: Results of a cross-national comparison.**  
5 *Social Science & Medicine* 1994, **39**:105-114.  
6
- 7  
8 6. Cochrane A, Leger AS, Moore F: **Health service 'input' and mortality 'output' in**  
9 **developed countries.** *Journal of Epidemiology and Community Health* 1978, **32**:200-  
10 205.  
11
- 12  
13 7. Anand S, Bärnighausen T: **Human resources and health outcomes: cross-**  
14 **country econometric study.** *Lancet* 2004, **364**:1603-9.  
15
- 16  
17 8. Anand S, Bärnighausen T: **Health workers and vaccination coverage in**  
18 **developing countries: an econometric analysis.** *The Lancet* 2007, **369**:1277-85.  
19
- 20  
21 9. WHO: *Working together for health: The World Health Report 2006.* 2006:237.  
22
- 23  
24 10. Mathauer I, Imhoff I: **Health worker motivation in Africa: the role of non-**  
25 **financial incentives and human resource management tools.** *Human resources for*  
26 *health* 2006, **4**:24.  
27
- 28  
29 11. Hongoro C, McPake B: **How to bridge the gap in human resources for health.**  
30 *The Lancet* 2004, **364**:1451-1456.  
31
- 32  
33 12. Rowe A, de Savigny D, Lanata C, Victora C: **How can we achieve and maintain**  
34 **high-quality performance of health workers in low-resource settings?** *The Lancet*  
35 2005, **366**:1026-1035.  
36
- 37  
38 13. Chopra M, Munro S, Lavis JN, Vist G, Bennett S: **Effects of policy options for**  
39 **human resources for health: an analysis of systematic reviews.** *The Lancet* 2008,  
40 **371**:668-674.  
41
- 42  
43 14. Buchan J: **What difference does (“ good ”) HRM make□?** *Human Resources*  
44 *for Health* 2004, **7**:1-7.  
45
- 46  
47 15. Siddiqi K, Newell J, Robinson M: **Getting evidence into practice: what works**  
48 **in developing countries?** *International Journal for Quality in Health Care* 2005,  
49 **17**:447-453.  
50
- 51  
52 16. Potter C, Brough R: **Systemic capacity building: a hierarchy of needs.** *Health*  
53 *Policy and Planning* 2004, **19**:336-345.  
54
- 55  
56 17. National Rural Health Mission: **Fourth Common Review Mission Report.** New  
57 Delhi:Government of India 2010:130.  
58 [www.mohfw.nic.in/NRHM/CRM/4th%20CRM%20Report%202010.pdf](http://www.mohfw.nic.in/NRHM/CRM/4th%20CRM%20Report%202010.pdf) (accessed 5  
59 Dec 2011)  
60
18. Bajpai N, Towle M, Vynatheya J: **Model districts as a roadmap for public**  
**health scale-up in India.** *Working Paper No. 4.* Mumbai: Columbia Global Centers,  
South Asia 2011:21.

1  
2  
3 www.globalcenters.columbia.edu/southasia/files/mumbai/content/Model\_Districts\_as  
4 \_a\_Roadmap\_Working\_Paper\_4\_v5JULY2011.pdf (accessed 5 Dec 2011)  
5

6 19. Filmer D, Hammer JS, Pritchett LH: **Weak links in the chain II: a prescription**  
7 **for health policy in poor countries.** *The World Bank Research Observer* 2002,  
8 17:47.  
9

10 20. International Institute for Population Sciences: **District Level Household and**  
11 **Facility Survey (DLHS-3), 2007-08** New Delhi:Ministry of Health & Family  
12 Welfare, Government of India 2010:186 www.rchiips.org/pdf/rch3/report/KA.pdf  
13 (accessed 5 Dec 2011)  
14

15 21. Office of the Registrar General & Census Commissioner: **Provisional Population**  
16 **Totals Paper 1 of 2011 India Series 1.** New Delhi: Government of India 2011:188.  
17 www.censusindia.gov.in/2011-prov-results/prov\_results\_paper1\_india.html (accessed  
18 5 Dec 2011)  
19

20 22. Devadasan N, Prashanth NS, Sudarshan H: **Tumkur health status report.**  
21 Bangalore: Institute of Public Health 2011:44. www.iphindia.org/tumkur-health-  
22 status-report (accessed 5 Dec 2011)  
23

24 23. Government of Karnataka: *Investing in human development: Karnataka Human*  
25 *Development Report 2005.* Bangalore: Department of Planning and Statistics,  
26 Government of Karnataka 2005:535  
27

28 24. Marchal B: **Why do some hospitals perform better than others? A realist**  
29 **evaluation of the role of health workforce management in well-performing**  
30 **health care organisations.** *PhD dissertation submitted to Vrije Universiteit Brussels*  
31 2011:227 www.itg.be/itg/Uploads/Volksgezondheid/B%20Marchal%20PhD.pdf  
32 (accessed 5 Dec 2011)  
33

34 25. Belle SB Van, Marchal B, Dubourg D, Kegels G: **How to develop a theory-**  
35 **driven evaluation design? Lessons learned from an adolescent sexual and**  
36 **reproductive health programme in West Africa.** *BMC Public Health* 2010, 10:741.  
37

38 26. Pawson R, Tilley N: **Realist evaluation.** In *DPRN Thematic Meeting 2006 Report*  
39 *on Evaluation.* Development Policy Review Network; 2008:35.  
40

41 27. Creswell JW, Clark VLP: **Choosing a mixed methods design.** In *Designing and*  
42 *Conducting Mixed Methods Research.* 2nd edition. edited by Creswell JW, Clark VLP  
43 Sage; 2006:58-89.  
44

45 28. Pawson R, Tilley N: *Realistic Evaluation.* London: Sage Publications; 1997.  
46

47 29. Gautam T, Dick R van, Wagner U: **Organizational Commitment in Nepalese**  
48 **Settings.** *Asian Journal of Social Psychology* 2001, 4:239-248.  
49

50 30. Tayyab S: **Antecedents and consequences of organizational commitment in**  
51 **Pakistan.** 2006:233.  
52

- 1  
2  
3 31. Tayyab S: **An empirical assessment of organizational commitment measures.**  
4 *Pakistan Journal of Psychological Research* 2007, **22**:Sum 2007:1-21.  
5  
6  
7 32. Bandura A: **Guide for constructing self-efficacy scales.** In *Self-Efficacy Beliefs*  
8 *of Adolescents.* edited by Pajares F, Urdan TC Information Age Publishing; 2006:307-  
9 337.  
10  
11 33. Schwarzer R, Jerusalem M: **Generalized Self-Efficacy scale.** In *Measures in*  
12 *health psychology: A user's portfolio.* edited by Weinman J, Wright S, Johnston M  
13 Windsor, England: NFER-NELSON; 1995:35-37.  
14  
15 34. Luszczynska A, Gutierrez-Dona B, Schwarzer R: **General self-efficacy in**  
16 **various domains of human functioning: Evidence from five countries.**  
17 *International Journal of Psychology* 2005, **40**:80-89.  
18  
19 35. Luszczynska A, Scholz U, Schwarzer R: **The general self-efficacy scale:**  
20 **multicultural validation studies.** *The Journal of psychology* 2005, **139**:439-57.  
21  
22 36. Bandura A: **Self-efficacy mechanism in human agency.** *American Psychologist*  
23 1982, **37**:122-147.  
24  
25 37. Oldham GR, Cummings A: **Employee Creativity: Personal and Contextual**  
26 **Factors At Work.** *Academy of Management Journal* 1996, **39**:607-634.  
27  
28 38. Cammann C, Fichman M, Jenkins G, Klesh J: *The Michigan Organizational*  
29 *Assessment Package.* Ann Arbor, Michigan: University of Michigan Survey Research  
30 Center; 1978.  
31  
32 39. **Epidata: A comprehensive tool for validated entry and documentation of**  
33 **data** [<http://www.epidata.dk>].  
34  
35 40. Campbell NC, Murray E, Darbyshire J, et al.: **Designing and evaluating complex**  
36 **interventions to improve health care.** *British Medical Journal* 2007, **334**:455.  
37  
38 41. Brown L, LaFond A, Macintyre K: **Measuring capacity building.** *Chapel Hill:*  
39 *MEASURE Evaluation* 2001:51 [www.heart-](http://www.heart-intl.net/HEART/Financial/comp/MeasuringCapacityBuildg.pdf)  
40 [intl.net/HEART/Financial/comp/MeasuringCapacityBuildg.pdf](http://www.heart-intl.net/HEART/Financial/comp/MeasuringCapacityBuildg.pdf) (accessed 5 Dec 2011)  
41  
42 42. Craig P, Dieppe P, Macintyre S, et al.: **Developing and evaluating complex**  
43 **interventions: the new Medical Research Council guidance.** *British Medical*  
44 *Journal* 2008, **337**:a1655-a1655.  
45  
46 43. Connelly JB: **Evaluating complex public health interventions: theory,**  
47 **methods and scope of realist enquiry.** *Journal of evaluation in clinical practice*  
48 2007, **13**:935-41.  
49  
50 44. Bennett S, Paina L, Kim C, Agyepong I, Chunharas S: **What must be done to**  
51 **enhance capacity for Health Systems Research?** In *Background Papers for the*  
52 *First Global Symposium on Health Systems Research.* Montreux, Switzerland: WHO;  
53 2010:30.  
54  
55  
56  
57  
58  
59  
60

1  
2  
3 45. Jimba M, Cometto G, Yamamoto T, et al.: **Health workforce: the critical**  
4 **pathway to universal health coverage.** In *Background paper for the global*  
5 *symposium on health systems research.* Montreux, Switzerland: WHO; 2010:46.  
6

7  
8 46. Berwick DM: **The science of improvement.** *JAMA: the journal of the*  
9 *American Medical Association* 2008, **299**:1182-4.

10  
11 47. Pawson R, Sridharan S: **Theory-driven evaluation of public health**  
12 **programmes.** In *Evidence-based public health: Effectiveness and Efficiency.* edited  
13 by Killoran A, Kelly MP Oxford Scholarship Online Monographs; 2009:43-63.  
14  
15  
16  
17  
18  
19  
20  
21  
22  
23  
24  
25  
26  
27  
28  
29  
30  
31  
32  
33  
34  
35  
36  
37  
38  
39  
40  
41  
42  
43  
44  
45  
46  
47  
48  
49  
50  
51  
52  
53  
54  
55  
56  
57  
58  
59  
60

For peer review only

## Figures

### Figure 1

**Short title:** Map of India showing Karnataka (shaded red) in south India

**Legend:** Map from Wikimedia Commons/User:Nichalp licensed under Creative Commons Attribution-Share Alike 3.0

### Figure 2

**Short title:** Map of Karnataka showing Tumkur district(shaded blue) and Raichur district (shaded green)

**Legend:** Map from Wikimedia Commons/User:Planemad licensed under Creative Commons Attribution-Share Alike 3.0

### Figure 3

**Short title:** Schematic showing the structure of the capacity-building intervention in Tumkur along with key actors and timeline

### Figure 4

**Short title:** Study design showing steps A to F

### Figure 5

**Short title:** Six steps proposed by Van Belle et al [21]

**Figure 6**

**Short title:** Hypothetical pathways to change based on initial reconstruction of programme theory and literature

**Figure 7**

**Short title:** Theories of behavioural change in health services in relation to their sphere of influence

**Supplementary files****Supplementary file 1**

File format: questionnaire\_final.pdf

Title: Questionnaire for health managers on training programmes, planning and supervision

Description: The questionnaire measures attitudes to training programmes, organisational commitment, self-efficacy and nature of supervision of health managers

**Supplementary file 2**

File format: ssi\_guide.pdf

Title: semi-structured interview guide

Description: An interview guide with probes to understand process of planning and attitudes towards planning

**Supplementary file 3**

File format: consent\_eng.pdf

1  
2  
3 Title: Consent form (English)  
4

5 Description: A blank consent form (English) used to obtain consent for interviews  
6  
7

8  
9  
10 **Supplementary file 4**

11 File format: consent\_kan.pdf

12  
13 Title: Consent form (Kannada)

14  
15 Description: A blank consent form in the Kannada (local language) used to obtain  
16 consent for interviews  
17  
18

19  
20  
21  
22 **Supplementary file 5**

23 File format: epidata\_val.pdf

24  
25 Title: epidata checks

26  
27 Description: epidata format showing the validity and checks for data entry  
28  
29  
30  
31  
32  
33  
34  
35  
36  
37  
38  
39  
40  
41  
42  
43  
44  
45  
46  
47  
48  
49  
50  
51  
52  
53  
54  
55  
56  
57  
58  
59  
60

(In English)



## Institute of Public Health

#250, Masters Cottage, 2<sup>nd</sup> C Main, 2<sup>nd</sup> C Cross, Girinagar I Phase, Bangalore – 560 045  
[www.iphindia.org](http://www.iphindia.org) Phone: +91 [REDACTED]

### Information sheet

**Background:** Institute of Public Health, Bangalore is a non-profit public health institute in Bangalore involved in training, research, consultancy and advocacy. The Institute has recently begun a training programme for the district and taluka health team in Tumkur.

**About the study:** The Institute is undertaking a study in your district to understand the process of planning, specifically the NRHM Programme Implementation Plan for 2010. The study will involve interviews and focus group discussions with people in the health department at district, taluka, PHC and village level. The study will also involve interviews with non-health personnel in the district who have been involved in making the NRHM PIP. In addition, policy makers within the state as well as national level will be interviewed.

**Why the study?** The study is being undertaken to understand the operational problems that happen in implementing the process of NRHM PIP as per the guidelines. We also hope to understand the problems that people face in the field and inform policy makers about it.

**Anonymity and confidentiality** of all views and opinions expressed during the interviews is guaranteed. The aim of the study is not to find fault with the process in your district, but to understand and document issues and problems with the process of PIP preparation itself, and on trying to find out how this can be improved. All original recordings of the interviews shall be destroyed after transcription and interviewees shall not be identified in any report or publication.

**Audio recording** will be done to help in capturing all the views and opinions expressed. The audio will be destroyed after transcribing. Complete anonymity and confidentiality of the individuals is guaranteed.

**Outcome:** The study findings will be used to inform policy-makers about the operational issues in PIP preparation. The findings will also help streamline and improve the process in the coming years. In addition, the findings will be used to inform training programmes and workshops for district health personnel in other district training programmes. A brief of the findings will be shared with you after the study.

For further information, please contact: Dr. Prashanth NS, PhD Fellow, Institute of Public Health, Bangalore. Phone: [REDACTED]

### Informed Consent

I have read and understood the details provided to me about the study through the information sheet above. I hereby consent to participate in the study with the understanding that my views and opinions shall be treated as anonymous.

I also agree to record my opinions. Yes/No.

Signature:

Date:



(In Kannada)

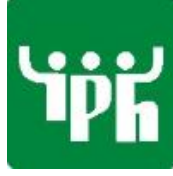

## Institute of Public Health

#250, Masters Cottage, 2<sup>nd</sup> C Main, 2<sup>nd</sup> C Cross, Girinagar I Phase, Bangalore – 560 045

[www.iphindia.org](http://www.iphindia.org) Phone: +91

### ಮಾಹಿತಿ ಚೀಟಿ

ಹಿನ್ನೆಲೆ : ಇನ್ಸ್ಟಿಟ್ಯೂಟ್ ಆಫ್ ಪಬ್ಲಿಕ್ ಹೆಲ್ತ್, ಬೆಂಗಳೂರು ಒಂದು ಸಮುದಾಯ ಆರೋಗ್ಯದ ಬಗ್ಗೆ ತರಬೇತಿ, ಸಂಶೋಧನೆ ಹಾಗೂ ಸಮಾಲೋಚನೆಯಲ್ಲಿ ತೊಡಗಿರುವ ಸಂಸ್ಥೆ. ಈ ಸಂಸ್ಥೆ ತುಮಕೂರಿನಲ್ಲಿ ಜಿಲ್ಲಾ ಹಾಗೂ ತಾಲೂಕು ಆರೋಗ್ಯ ಸಂಸ್ಥೆಗಳಲ್ಲಿ ಸೇವೆ ಸಲ್ಲಿಸುತ್ತಿರುವ ಸಿಬ್ಬಂದಿಗೆ ತರಬೇತಿ ನೀಡುತ್ತಿದೆ.

ಸಂಶೋಧನೆ : ನಮ್ಮ ಸಂಸ್ಥೆಯು ನಿಮ್ಮ ಜಿಲ್ಲೆಯಲ್ಲಿ ನಕಾಶೆ ಮಾಡುವುದರ ಬಗ್ಗೆ ಅದರಲ್ಲೂ ರಾಷ್ಟ್ರೀಯ ಗ್ರಾಮೀಣ ಆರೋಗ್ಯ ಅಭಿಯಾನದ ಅಡಿಯಲ್ಲಿ ೨೦೧೦ ವರ್ಷದ ಪಿ ಐ ಪಿ ಯಾವ ರೀತಿ ಮಾಡಲಾಯಿತು ಎಂಬುದರ ಬಗ್ಗೆ ತಿಳಿಯಲು ಒಂದು ಸಂಶೋಧನೆ ನಡೆಸುತ್ತಿದೆ. ಈ ಸಂಶೋಧನೆ ಪಿ ಐ ಪಿ ಮಾಡುವುದರಲ್ಲಿ ನಿಮ್ಮಲ್ಲಿ ಯಾವ ರೀತಿ ತೊಂದರೆ ಹಾಗೂ ಅಡಚಣೆಗಳು ಬರುತ್ತವೆ ಎಂದು ತಿಳಿಯಲು ಮಾಡುತ್ತಿದ್ದೇವೆ. ಸಂಶೋಧನೆಯಲ್ಲಿ ತಪ್ಪು ಕಂಡುಹಿಡಿಯುವುದಾಗಲಿ, ಅಥವಾ ಕೊರತೆಗಳು ಕಂಡುಹಿಡಿಯುವುದಕ್ಕಾಗಲಿ ಮಾಡುತ್ತಿಲ್ಲ. ನಾವು ಈ ಕುರಿತು ಜಿಲ್ಲಾ ತಾಲ್ಲೂಕು ಪಿ ಎಚ್ ಸಿ ಹಾಗೂ ಹಳ್ಳಿಗಳ ಮಟ್ಟದಲ್ಲಿ ಆರೋಗ್ಯ ಸೇವೆಗಳ ಸಿಬ್ಬಂದಿಯೊಂದಿಗೆ ಸಂದರ್ಶನ ನಡೆಸುತ್ತೇವೆ. ಜೊತೆಗೆ, ಜಿಲ್ಲಾ ಮಟ್ಟದಲ್ಲಿ ಪಿ ಐ ಪಿ ಯಲ್ಲಿ ತೊಡಗಿದ ಅಧಿಕಾರಿಗಳೊಂದಿಗೂ ಸಂದರ್ಶನ ಮಾಡುತ್ತೇವೆ. ನಂತರ, ರಾಷ್ಟ್ರ ಮಟ್ಟದಲ್ಲಿ ಹಾಗೂ ಕೇಂದ್ರ ಸರ್ಕಾರದ ಮಟ್ಟದಲ್ಲಿ ಏನ್.ಆರ್.ಎಚ್.ಎಂ ಅಧಿಕಾರಿಗಳೊಂದಿಗೂ ಸಂದರ್ಶಿಸುತ್ತೇವೆ.

ಏಕೆ : ಪಿ.ಐ.ಪಿ ಮಾಡುವುದರಲ್ಲಿ ಹಲವಾರು ತೊಂದರೆಗಳು ಮತ್ತು ಅಡಚಣೆಗಳು ಕಂಡುಬರುತ್ತವೆ. ಆದರೆ ಪ್ರತಿ ವರ್ಷ ಪಿ.ಐ.ಪಿ ಇಡೀ ದೇಶದಲ್ಲಿ ಒಂದೇ ರೀತಿಯಲ್ಲಿ ಮಾಡಲಾಗುತ್ತದೆ. ಈ ಸಂಶೋಧನೆಯ ಮುಖಾಂತರ ನಾವು ಜಿಲ್ಲಾ ತಾಲ್ಲೂಕು ಹಾಗೂ ಕೆಳ ಮಟ್ಟದಲ್ಲಿ ಆಗುವ ತೊಂದರೆಗಳನ್ನು ಅರಿತು, ಇವನ್ನು ನಿವಾರಿಸುವುದಕ್ಕೆ ಯಾವ ಕ್ರಮ ಕೈಗೊಳ್ಳಬೇಕೆಂದು ಮೇಲಿನ ಅಧಿಕಾರಿಗಳ ಮುಂದೆ ಇಡುತ್ತೇವೆ.

ಅನಾಮಧೇಯತೆ ಹಾಗೂ ಗೌಪ್ಯತೆ : ಸಂದರ್ಶನದಲ್ಲಿ ವ್ಯಕ್ತಿ ಪಡಿಸಿರುವ ಎಲ್ಲಾ ಅಭಿಪ್ರಾಯಗಳ ಗೌಪ್ಯತೆ ಕಾಪಾಡಲಾಗುವುದು. ಹಾಗೂ ಎಲ್ಲಾ ಅಭಿಪ್ರಾಯಗಳು ಅನಾಮಧೇಯವಾಗಿ ಅಧ್ಯಯಿಸಲಾಗುವುದು. ಮೂದಲೇ ತಿಳಿಸಿರುವಂತೆ ಈ ಸಂದರ್ಶನ ಪಿ.ಐ.ಪಿ ಯಲ್ಲಿ ಆಗುವ ಅಡಚಣೆಗಳು ಹಾಗೂ ತೊಂದರೆಗಳನ್ನು ಅರ್ಥ ಮಾಡಿಕೊಂಡು ನಿವಾರಿಸಲು ಮಾಡಲಾಗುತ್ತಿದೆ; ತಪ್ಪು ಕಂಡುಹಿಡಿಯುವುದಕ್ಕಲ್ಲ. ನಿಮ್ಮ ಅಭಿಪ್ರಾಯಗಳನ್ನು ನಿಮ್ಮ ಹೆಸರಿನಿಂದ ಯಾವುದೇ ರೀತಿಯಲ್ಲಿ ಗುರುತಿಸುವಂತೆ ಹೊರಪಡಿಸಲಾಗುವುದಿಲ್ಲ.

ಧ್ವನಿ ಮುದ್ರಣ: ನಿಮ್ಮ ಉತ್ತರ ಹಾಗೂ ಅಭಿಪ್ರಾಯಗಳನ್ನು ಧ್ವನಿ ಮುದ್ರಣ ಯಂತ್ರದ ಮೂಲಕ ಉಲ್ಲೇಖಿಸಲಾಗುವುದು. ಈ ರೀತಿ ತೆಗೆದುಕೊಂಡಿರುವ ಧ್ವನಿ ಮುದ್ರಣವನ್ನು ಅಧ್ಯಯನದ ನಂತರ ಅಳಿಸಲಾಗುವುದು.

ಪರಿಣಾಮ: ಈ ಅಧ್ಯಯನದ ಪರಿಣಾಮವನ್ನು ಮೇಲಿನ ಅಧಿಕಾರಿಗಳಿಗೆ ಜಿಲ್ಲಾ ತಾಲ್ಲೂಕು ಹಾಗೂ ಹಳ್ಳಿಗಳ ಮಟ್ಟದಲ್ಲಿ ಪಿ.ಐ.ಪಿ ಮಾಡುವುದರಲ್ಲಿ ಯಾವ ರೀತಿಯ ತೊಂದರೆಗಳು ಹಾಗೂ ಅಡಚಣೆಗಳು ಉಂಟಾಗುತ್ತವೆ ಎಂದು ಮತ್ತು ಯಾವ ರೀತಿಯ ಬದಲಾವಣೆಗಳನ್ನು ತರಬೇಕು ಎಂಬುದರ ಬಗ್ಗೆ ತಿಳಿಸಲು ಉಪಯೋಗಿಸಲಾಗುವುದು. ಅದರೊಂದಿಗೆ ಜಿಲ್ಲಾ ಮಟ್ಟದ ಅಧಿಕಾರಿಗಳ ತರಬೇತಿಯಲ್ಲೂ ಉಪಯೋಗಿಸಲಾಗುವುದು. ಪರಿಣಾಮಗಳ ಪಕ್ಷಿನೋಟವನ್ನು ನಿಮಗೇ ಕೊಡಲಾಗುವುದು. ಹೆಚ್ಚು ಮಾಹಿತಿಗಾಗಿ, ಇವರನ್ನು ಸಂಪರ್ಕಿಸಿ: ಡಾ|| ಪ್ರಶಾಂತ್ ಏನ್.ಎಸ್. ಪಿ.ಎಚ್.ಡಿ ವಿದ್ಯಾರ್ಥಿ ಇನ್ಸ್ಟಿಟ್ಯೂಟ್ ಆಫ್ ಪಬ್ಲಿಕ್ ಹೆಲ್ತ್, ಬೆಂಗಳೂರು - ೫೬೦೦೪೫. ದೂ: ೯೮೪೯೫ ೯೯೫೬೬. ಈ ಮೈಲ್:

ನಾನು ಮೇಲಿರುವ ವಿಚಾರವನ್ನು ಓದಿ ತಿಳಿದು, ಈ ಸಂಶೋಧನೆಗೆ ಸಂದರ್ಶನ ನೀಡಲು ಒಪ್ಪಿದ್ದೇನೆ. ನಾನು ಹೇಳುವ ಮಾತುಗೆ ಗೌಪ್ಯತೆಯನ್ನು ಕಾಪಡಲಾಗುತ್ತದೆಂದು ತಿಳಿಸಲಾಗಿದೆ. ನನ್ನ ಮಾತುಗಳ ಧ್ವನಿಮುದ್ರಣಕ್ಕೆ ಒಪ್ಪಿದ್ದೇನೆ. ಹುದು/ಇಲ್ಲ

ಸಹಿ:  
ದಿನಾಂಕ:

File label: Survey DHM

File size: 11 kb  
 Last revision: 20. Oct 2011 4:57 PM  
 Number of fields: 130  
 Number of records: 0  
 Checks applied: Yes (Last revision 20. Oct 2011 6:20 PM)

Fields in data file:

| No | Name | Variable label                    | Field type | Width | Checks                       | Value labels                                                                                          |
|----|------|-----------------------------------|------------|-------|------------------------------|-------------------------------------------------------------------------------------------------------|
| 9  | id   | automatic id number               | ID number  | 5     |                              |                                                                                                       |
| 12 | a1   | respondent number                 | Number     | 3     | Must enter<br>Legal: 100-300 |                                                                                                       |
| 13 | a2   | interviewer name                  | Number     | 1     | Must enter<br>Legal: 0-11    | interview<br>1: Pra<br>2: Kur<br>3: Bhee<br>4: Mah<br>5: Other                                        |
| 20 | a3   | date                              | Date (dmy) | 10    | Must enter                   |                                                                                                       |
| 22 | a4   | time taken(in minutes)            | Number     | 2     | Must enter<br>Legal: 0-90    |                                                                                                       |
| 24 | a5   | person doing data entry           | Number     | 1     | Must enter<br>Legal: 0-3     | dataentry<br>1: Srinivas<br>2: Other                                                                  |
| 28 | a6   | data checked                      | Number     | 1     | Must enter<br>Legal: 0-2     | yesno<br>0: Blank<br>1: Yes<br>2: No                                                                  |
| 32 | b1   | The purpose of the NRHM PIP       | Number     | 1     | Must enter<br>Legal: 0-4     |                                                                                                       |
| 34 | b2   | If I were in charge of NRHM       | Number     | 1     | Must enter<br>Legal: 0-5     |                                                                                                       |
| 37 | b3   | At the PHC level                  | Number     | 1     | Must enter<br>Legal: 0-4     |                                                                                                       |
| 39 | b4   | At the taluka level               | Number     | 1     | Must enter<br>Legal: 0-5     |                                                                                                       |
| 42 | b5   | Which statement best summarises   | Number     | 1     | Must enter<br>Legal: 0-6     |                                                                                                       |
| 44 | b6   | For every PIP                     | Number     | 1     | Must enter<br>Legal: 0-5     | likert<br>0: Blank<br>1: Strongly a<br>2: Agree<br>3: Neither a nor d<br>4: Disagree<br>5: Strongly d |
| 51 | b7   | PIPs can be used to bring about   | Number     | 1     | Must enter<br>Legal: 0-5     | likert<br>0: Blank<br>1: Strongly a<br>2: Agree<br>3: Neither a nor d<br>4: Disagree<br>5: Strongly d |
| 57 | b8   | Districts need technical guidance | Number     | 1     | Must enter<br>Legal: 0-5     | likert<br>0: Blank<br>1: Strongly a<br>2: Agree<br>3: Neither a nor d<br>4: Disagree<br>5: Strongly d |
| 16 | b9   | Talukas need                      | Number     | 1     | Must enter                   | likert                                                                                                |

technical  
guidance

**BMJ Open**

Legal: 0-5

0: Blank  
1: Strongly a  
2: Agree  
3: Neither a nor d  
4: Disagree  
5: Strongly d

1  
2  
3  
4  
5  
6  
7  
8  
9  
10  
11  
12  
13  
14  
15  
16  
17  
18  
19  
20  
21  
22  
23  
24  
25  
26  
27  
28  
29  
30  
31  
32  
33  
34  
35  
36  
37  
38  
39  
40  
41  
42  
43  
44  
45  
46  
47  
48  
49  
50  
51  
52  
53  
54  
55  
56  
57  
58  
59  
60

b10  
b11  
b12  
b13  
b14  
b15  
b16  
b17  
b18  
b19

PHCs need  
technical  
guidance

PIP preparation  
at taluka level

I am able to  
negotiate

In this year's  
PIP

the activities  
that we included

After the NRHM  
PIP process

After the  
submission of  
PIP

In my district,  
most of my  
colleagus

In my district,  
most PHCs

In my facility

Number

1

1

1

1

1

1

1

1

1

1

1

Must enter  
Legal: 0-5

likert  
0: Blank  
1: Strongly a  
2: Agree  
3: Neither a nor d  
4: Disagree  
5: Strongly d

likert  
0: Blank  
1: Strongly a  
2: Agree  
3: Neither a nor d  
4: Disagree  
5: Strongly d

likert  
0: Blank  
1: Strongly a  
2: Agree  
3: Neither a nor d  
4: Disagree  
5: Strongly d

likert  
0: Blank  
1: Strongly a  
2: Agree  
3: Neither a nor d  
4: Disagree  
5: Strongly d

likert  
0: Blank  
1: Strongly a  
2: Agree  
3: Neither a nor d  
4: Disagree  
5: Strongly d

likert  
0: Blank  
1: Strongly a  
2: Agree  
3: Neither a nor d  
4: Disagree  
5: Strongly d

likert  
0: Blank  
1: Strongly a  
2: Agree  
3: Neither a nor d  
4: Disagree  
5: Strongly d

likert  
0: Blank  
1: Strongly a  
2: Agree  
3: Neither a nor d  
4: Disagree  
5: Strongly d

likert  
0: Blank  
1: Strongly a  
2: Agree  
3: Neither a nor d  
4: Disagree  
5: Strongly d

likert  
0: Blank  
1: Strongly a  
2: Agree  
3: Neither a nor d  
4: Disagree  
5: Strongly d

likert  
0: Blank  
1: Strongly a  
2: Agree  
3: Neither a nor d  
4: Disagree  
5: Strongly d



|    |     |                            |        |   |                                                          |                                                                                                       |
|----|-----|----------------------------|--------|---|----------------------------------------------------------|-------------------------------------------------------------------------------------------------------|
| 1  |     |                            |        |   |                                                          |                                                                                                       |
| 2  | c11 | I would feel guilty if I   | Number | 1 | Must enter<br>Legal: 0-5                                 | likert<br>0: Blank<br>1: Strongly a<br>2: Agree<br>3: Neither a nor d<br>4: Disagree<br>5: Strongly d |
| 3  |     |                            |        |   |                                                          |                                                                                                       |
| 4  |     |                            |        |   |                                                          |                                                                                                       |
| 5  |     |                            |        |   |                                                          |                                                                                                       |
| 6  |     |                            |        |   |                                                          |                                                                                                       |
| 7  |     |                            |        |   |                                                          |                                                                                                       |
| 8  |     |                            |        |   |                                                          |                                                                                                       |
| 9  | c12 | I do not feel like part    | Number | 1 | Must enter<br>Legal: 0-5                                 | likert<br>0: Blank<br>1: Strongly a<br>2: Agree<br>3: Neither a nor d<br>4: Disagree<br>5: Strongly d |
| 10 |     |                            |        |   |                                                          |                                                                                                       |
| 11 |     |                            |        |   |                                                          |                                                                                                       |
| 12 |     |                            |        |   |                                                          |                                                                                                       |
| 13 |     |                            |        |   |                                                          |                                                                                                       |
| 14 |     |                            |        |   |                                                          |                                                                                                       |
| 15 | c13 | This organisation deserves | Number | 1 | Must enter<br>Legal: 0-5                                 | likert<br>0: Blank<br>1: Strongly a<br>2: Agree<br>3: Neither a nor d<br>4: Disagree<br>5: Strongly d |
| 16 |     |                            |        |   |                                                          |                                                                                                       |
| 17 |     |                            |        |   |                                                          |                                                                                                       |
| 18 |     |                            |        |   |                                                          |                                                                                                       |
| 19 |     |                            |        |   |                                                          |                                                                                                       |
| 20 |     |                            |        |   |                                                          |                                                                                                       |
| 21 |     |                            |        |   |                                                          |                                                                                                       |
| 22 | c14 | I might consider working   | Number | 1 | Must enter<br>Legal: 0-5                                 | likert<br>0: Blank<br>1: Strongly a<br>2: Agree<br>3: Neither a nor d<br>4: Disagree<br>5: Strongly d |
| 23 |     |                            |        |   |                                                          |                                                                                                       |
| 24 |     |                            |        |   |                                                          |                                                                                                       |
| 25 |     |                            |        |   |                                                          |                                                                                                       |
| 26 |     |                            |        |   |                                                          |                                                                                                       |
| 27 |     |                            |        |   |                                                          |                                                                                                       |
| 28 | c15 | I would not consider       | Number | 1 | Must enter<br>Legal: 0-5                                 | likert<br>0: Blank<br>1: Strongly a<br>2: Agree<br>3: Neither a nor d<br>4: Disagree<br>5: Strongly d |
| 29 |     |                            |        |   |                                                          |                                                                                                       |
| 30 |     |                            |        |   |                                                          |                                                                                                       |
| 31 |     |                            |        |   |                                                          |                                                                                                       |
| 32 |     |                            |        |   |                                                          |                                                                                                       |
| 33 |     |                            |        |   |                                                          |                                                                                                       |
| 34 |     |                            |        |   |                                                          |                                                                                                       |
| 35 | c16 | This organisation has      | Number | 1 | Must enter<br>Legal: 0-5                                 | likert<br>0: Blank<br>1: Strongly a<br>2: Agree<br>3: Neither a nor d<br>4: Disagree<br>5: Strongly d |
| 36 |     |                            |        |   |                                                          |                                                                                                       |
| 37 |     |                            |        |   |                                                          |                                                                                                       |
| 38 |     |                            |        |   |                                                          |                                                                                                       |
| 39 |     |                            |        |   |                                                          |                                                                                                       |
| 40 |     |                            |        |   |                                                          |                                                                                                       |
| 41 | c17 | Too much of my             | Number | 1 | Must enter<br>Legal: 0-5                                 | likert<br>0: Blank<br>1: Strongly a<br>2: Agree<br>3: Neither a nor d<br>4: Disagree<br>5: Strongly d |
| 42 |     |                            |        |   |                                                          |                                                                                                       |
| 43 |     |                            |        |   |                                                          |                                                                                                       |
| 44 |     |                            |        |   |                                                          |                                                                                                       |
| 45 |     |                            |        |   |                                                          |                                                                                                       |
| 46 |     |                            |        |   |                                                          |                                                                                                       |
| 47 |     |                            |        |   |                                                          |                                                                                                       |
| 48 | c18 | I owe a great              | Number | 1 | Must enter<br>Legal: 0-5                                 | likert<br>0: Blank<br>1: Strongly a<br>2: Agree<br>3: Neither a nor d<br>4: Disagree<br>5: Strongly d |
| 49 |     |                            |        |   |                                                          |                                                                                                       |
| 50 |     |                            |        |   |                                                          |                                                                                                       |
| 51 |     |                            |        |   |                                                          |                                                                                                       |
| 52 |     |                            |        |   |                                                          |                                                                                                       |
| 53 |     |                            |        |   |                                                          |                                                                                                       |
| 54 |     |                            |        |   |                                                          |                                                                                                       |
| 55 | d1  | I can solve difficult      | Number | 3 | Must enter<br>Legal: 0,01,10,20,30,40,50,60,70,80,90,100 |                                                                                                       |
| 56 |     |                            |        |   |                                                          |                                                                                                       |
| 57 |     |                            |        |   |                                                          |                                                                                                       |
| 58 |     |                            |        |   |                                                          |                                                                                                       |
| 59 | d2  | If someone opposes me      | Number | 3 | Must enter<br>Legal: 0,01,10,20,30,40,50,60,70,80,90,100 |                                                                                                       |
| 60 |     |                            |        |   |                                                          |                                                                                                       |

|    |     |                                         |        |    |                                                          |                                                                                                                                                                                                                                                               |
|----|-----|-----------------------------------------|--------|----|----------------------------------------------------------|---------------------------------------------------------------------------------------------------------------------------------------------------------------------------------------------------------------------------------------------------------------|
| 49 | d4  | I am confident that                     | Number | 3  | Must enter<br>Legal: 0,01,10,20,30,40,50,60,70,80,90,100 |                                                                                                                                                                                                                                                               |
| 1  |     |                                         |        |    |                                                          |                                                                                                                                                                                                                                                               |
| 2  |     |                                         |        |    |                                                          |                                                                                                                                                                                                                                                               |
| 3  |     |                                         |        |    |                                                          |                                                                                                                                                                                                                                                               |
| 50 | d5  | Thanks to my strategic                  | Number | 3  | Must enter<br>Legal: 0,01,10,20,30,40,50,60,70,80,90,100 |                                                                                                                                                                                                                                                               |
| 4  |     |                                         |        |    |                                                          |                                                                                                                                                                                                                                                               |
| 5  |     |                                         |        |    |                                                          |                                                                                                                                                                                                                                                               |
| 6  |     |                                         |        |    |                                                          |                                                                                                                                                                                                                                                               |
| 7  |     |                                         |        |    |                                                          |                                                                                                                                                                                                                                                               |
| 51 | d6  | I can solve most                        | Number | 3  | Must enter<br>Legal: 0,01,10,20,30,40,50,60,70,80,90,100 |                                                                                                                                                                                                                                                               |
| 8  |     |                                         |        |    |                                                          |                                                                                                                                                                                                                                                               |
| 9  |     |                                         |        |    |                                                          |                                                                                                                                                                                                                                                               |
| 10 |     |                                         |        |    |                                                          |                                                                                                                                                                                                                                                               |
| 11 |     |                                         |        |    |                                                          |                                                                                                                                                                                                                                                               |
| 52 | d7  | I can remain calm                       | Number | 3  | Must enter<br>Legal: 0,01,10,20,30,40,50,60,70,80,90,100 |                                                                                                                                                                                                                                                               |
| 12 |     |                                         |        |    |                                                          |                                                                                                                                                                                                                                                               |
| 13 |     |                                         |        |    |                                                          |                                                                                                                                                                                                                                                               |
| 14 |     |                                         |        |    |                                                          |                                                                                                                                                                                                                                                               |
| 15 |     |                                         |        |    |                                                          |                                                                                                                                                                                                                                                               |
| 53 | d8  | When I am confronted                    | Number | 3  | Must enter<br>Legal: 0,01,10,20,30,40,50,60,70,80,90,100 |                                                                                                                                                                                                                                                               |
| 16 |     |                                         |        |    |                                                          |                                                                                                                                                                                                                                                               |
| 17 |     |                                         |        |    |                                                          |                                                                                                                                                                                                                                                               |
| 18 |     |                                         |        |    |                                                          |                                                                                                                                                                                                                                                               |
| 19 |     |                                         |        |    |                                                          |                                                                                                                                                                                                                                                               |
| 20 | d9  | If I am in trouble                      | Number | 3  | Must enter<br>Legal: 0,01,10,20,30,40,50,60,70,80,90,100 |                                                                                                                                                                                                                                                               |
| 21 |     |                                         |        |    |                                                          |                                                                                                                                                                                                                                                               |
| 22 |     |                                         |        |    |                                                          |                                                                                                                                                                                                                                                               |
| 23 |     |                                         |        |    |                                                          |                                                                                                                                                                                                                                                               |
| 24 | d10 | No matter what                          | Number | 3  | Must enter<br>Legal: 0,01,10,20,30,40,50,60,70,80,90,100 |                                                                                                                                                                                                                                                               |
| 25 |     |                                         |        |    |                                                          |                                                                                                                                                                                                                                                               |
| 26 |     |                                         |        |    |                                                          |                                                                                                                                                                                                                                                               |
| 27 |     |                                         |        |    |                                                          |                                                                                                                                                                                                                                                               |
| 28 | e1  | district                                | Number | 1  | Must enter<br>Legal: 0-2                                 |                                                                                                                                                                                                                                                               |
| 29 |     |                                         |        |    |                                                          |                                                                                                                                                                                                                                                               |
| 30 | e2  | taluka                                  | Number | 3  | Must enter<br>Legal: 0-16                                | taluka<br>0: Blank<br>1: Tumkur<br>2: Gubbi<br>3: Tiptur<br>4: Turuvekere<br>5: CNhalli<br>6: Kunigal<br>7: Madhugiri<br>8: Pavagada<br>9: Koratagere<br>10: Sira<br>11: Raichur<br>12: Sindhanur<br>13: Manvi<br>14: Lingsugur<br>15: Devadurga<br>16: Other |
| 31 |     |                                         |        |    |                                                          |                                                                                                                                                                                                                                                               |
| 32 |     |                                         |        |    |                                                          |                                                                                                                                                                                                                                                               |
| 33 |     |                                         |        |    |                                                          |                                                                                                                                                                                                                                                               |
| 34 |     |                                         |        |    |                                                          |                                                                                                                                                                                                                                                               |
| 35 |     |                                         |        |    |                                                          |                                                                                                                                                                                                                                                               |
| 36 |     |                                         |        |    |                                                          |                                                                                                                                                                                                                                                               |
| 37 |     |                                         |        |    |                                                          |                                                                                                                                                                                                                                                               |
| 38 |     |                                         |        |    |                                                          |                                                                                                                                                                                                                                                               |
| 39 |     |                                         |        |    |                                                          |                                                                                                                                                                                                                                                               |
| 40 |     |                                         |        |    |                                                          |                                                                                                                                                                                                                                                               |
| 41 |     |                                         |        |    |                                                          |                                                                                                                                                                                                                                                               |
| 42 |     |                                         |        |    |                                                          |                                                                                                                                                                                                                                                               |
| 43 |     |                                         |        |    |                                                          |                                                                                                                                                                                                                                                               |
| 44 |     |                                         |        |    |                                                          |                                                                                                                                                                                                                                                               |
| 45 |     |                                         |        |    |                                                          |                                                                                                                                                                                                                                                               |
| 46 | e3  | primary designation                     | Text   | 34 | Must enter                                               |                                                                                                                                                                                                                                                               |
| 47 |     |                                         |        |    |                                                          |                                                                                                                                                                                                                                                               |
| 48 |     |                                         |        |    |                                                          |                                                                                                                                                                                                                                                               |
| 49 | e4  | How long have you (in years)            | Number | 2  | Must enter<br>Legal: 0-35                                |                                                                                                                                                                                                                                                               |
| 50 |     |                                         |        |    |                                                          |                                                                                                                                                                                                                                                               |
| 51 | e51 | concepts in public health               | Number | 1  | Must enter<br>Legal: 0,1                                 | checkbox<br>0: Blank or no tick<br>1: Ticked                                                                                                                                                                                                                  |
| 52 |     |                                         |        |    |                                                          |                                                                                                                                                                                                                                                               |
| 53 |     |                                         |        |    |                                                          |                                                                                                                                                                                                                                                               |
| 54 | e52 | leadership                              | Number | 1  | Must enter<br>Legal: 0,1                                 | checkbox<br>0: Blank or no tick<br>1: Ticked                                                                                                                                                                                                                  |
| 55 |     |                                         |        |    |                                                          |                                                                                                                                                                                                                                                               |
| 56 |     |                                         |        |    |                                                          |                                                                                                                                                                                                                                                               |
| 57 |     |                                         |        |    |                                                          |                                                                                                                                                                                                                                                               |
| 58 | e53 | planning                                | Number | 1  | Must enter<br>Legal: 0,1                                 | checkbox<br>0: Blank or no tick<br>1: Ticked                                                                                                                                                                                                                  |
| 59 |     |                                         |        |    |                                                          |                                                                                                                                                                                                                                                               |
| 60 |     |                                         |        |    |                                                          |                                                                                                                                                                                                                                                               |
| 63 | e54 | human resources planning and motivation | Number | 1  | Must enter<br>Legal: 0,1                                 | checkbox<br>0: Blank or no tick<br>1: Ticked                                                                                                                                                                                                                  |

|    |     |                                |        |   |                           |          |                                             |
|----|-----|--------------------------------|--------|---|---------------------------|----------|---------------------------------------------|
| 64 | e55 | administrative procedures      | Number | 1 | Must enter<br>Legal: 0,1  | BMJ Open | tickbox<br>0: Blank or no tick<br>1: Ticked |
| 65 | e56 | health and hospital management | Number | 1 | Must enter<br>Legal: 0,1  |          | tickbox<br>0: Blank or no tick<br>1: Ticked |
| 66 | e57 | HMIS                           | Number | 1 | Must enter<br>Legal: 0,1  |          | tickbox<br>0: Blank or no tick<br>1: Ticked |
| 67 | e58 | health and hospital management | Number | 1 | Must enter<br>Legal: 0,1  |          | tickbox<br>0: Blank or no tick<br>1: Ticked |
| 68 | e59 | financial and medicolegal      | Number | 1 | Must enter<br>Legal: 0,1  |          | tickbox<br>0: Blank or no tick<br>1: Ticked |
| 69 | e60 | teamwork                       | Number | 1 | Must enter<br>Legal: 0,1  |          | tickbox<br>0: Blank or no tick<br>1: Ticked |
| 70 | e61 | emergency obstetric care       | Number | 1 | Must enter<br>Legal: 0,1  |          | tickbox<br>0: Blank or no tick<br>1: Ticked |
| 71 | e62 | role of PRI                    | Number | 1 | Must enter<br>Legal: 0,1  |          | tickbox<br>0: Blank or no tick<br>1: Ticked |
| 72 | e63 | nrhm pip                       | Number | 1 | Must enter<br>Legal: 0,1  |          | tickbox<br>0: Blank or no tick<br>1: Ticked |
| 73 | e64 | supportive supervision         | Number | 1 | Must enter<br>Legal: 0,1  |          | tickbox<br>0: Blank or no tick<br>1: Ticked |
| 74 | e65 | quality in health care         | Number | 1 | Must enter<br>Legal: 0,1  |          | tickbox<br>0: Blank or no tick<br>1: Ticked |
| 75 | e66 | other topic not listed         | Number | 1 | Must enter<br>Legal: 0,1  |          | tickbox<br>0: Blank or no tick<br>1: Ticked |
| 76 | e6  | have you attended the          | Number | 1 | Must enter<br>Legal: 0-3  |          |                                             |
| 77 | e7  | if yes which components        | Number | 1 | Must enter<br>Legal: 0-4  |          |                                             |
| 78 | e8  | in the swasthya karnataka      | Number | 1 | Must enter<br>Legal: 0-12 |          |                                             |
| 79 | e9  | have you been visited          | Number | 1 | Must enter<br>Legal: 0-3  |          |                                             |
| 80 | e10 | if yes how many times          | Number | 2 | Must enter<br>Legal: 0-50 |          |                                             |
| 81 | f1  | the content of the classroom   | Number | 1 | Must enter<br>Legal: 0-6  |          |                                             |
| 82 | f2  | after attending the classes    | Number | 1 | Must enter<br>Legal: 0-6  |          |                                             |
| 83 | f3  | after the classes, I can       | Number | 1 | Must enter<br>Legal: 0-6  |          |                                             |
| 84 | f4  | the visits ...skills           | Number | 1 | Must enter<br>Legal: 0-6  |          |                                             |
| 85 | f5  | the visits ...implement        | Number | 1 | Must enter<br>Legal: 0-6  |          |                                             |
| 86 | f6  | the visits ...discuss          | Number | 1 | Must enter<br>Legal: 0-6  |          |                                             |
| 87 | f7  | working on                     | Number | 1 | Must enter                |          |                                             |

assignments

Legal: 0-6

BMJ Open

|           |                                         |        |    |                                                                              |                                                                                                       |
|-----------|-----------------------------------------|--------|----|------------------------------------------------------------------------------|-------------------------------------------------------------------------------------------------------|
| 88 f8     | because of the discussion               | Number | 1  | Must enter<br>Legal: 0-6                                                     |                                                                                                       |
| 89 f9     | After the training programme            | Number | 1  | Must enter<br>Legal: 0-3                                                     |                                                                                                       |
| 90 f10a   | reasons given yes or no                 | Number | 1  | Must enter<br>Legal: 0-2<br>Jumps: 0>f11,2>f11                               | yesno<br>0: Blank<br>1: Yes<br>2: No                                                                  |
| 91 f10b   | reason given 1                          | Text   | 78 | Must enter                                                                   |                                                                                                       |
| 92 f10bb  | reason given 1 continued                | Text   | 78 |                                                                              |                                                                                                       |
| 93 f10c   | reason given 2                          | Text   | 78 | Must enter                                                                   |                                                                                                       |
| 94 f10cc  | reason given 2                          | Text   | 78 |                                                                              |                                                                                                       |
| 96 f11    | if you answered no                      | Number | 1  | Must enter<br>Legal: 0-7<br>Jumps: 0>f12,1>f12,2>f12,3>f12,4>f12,5>f12,7>f12 |                                                                                                       |
| 99 f11a   | Other Please specify in the space below | Text   | 78 | Must enter                                                                   |                                                                                                       |
| 99 f11b   | Please specify                          | Text   | 78 |                                                                              |                                                                                                       |
| 99 f12    | after the training programme            | Number | 1  | Must enter<br>Legal: 0-3                                                     |                                                                                                       |
| 99 f13a   | reasons given yes or no                 | Number | 1  | Must enter<br>Legal: 0-2<br>Jumps: 0>f14,2>f14                               | yesno<br>0: Blank<br>1: Yes<br>2: No                                                                  |
| 100 f13b  | reason given 1                          | Text   | 78 | Must enter                                                                   |                                                                                                       |
| 100 f13bb | reason given 1 continued                | Text   | 78 |                                                                              |                                                                                                       |
| 102 f13c  | reason given 2                          | Text   | 78 | Must enter                                                                   |                                                                                                       |
| 103 f13cc | reason given 2                          | Text   | 78 |                                                                              |                                                                                                       |
| 104 f14   | if you answered no                      | Number | 1  | Must enter<br>Legal: 0-7<br>Jumps: 0>g1,1>g1,2>g1,3>g1,4>g1,5>g1,7>g1        |                                                                                                       |
| 105 f14a  | Other Please specify in the space below | Text   | 78 | Must enter                                                                   |                                                                                                       |
| 109 f14b  | Please specify                          | Text   | 78 |                                                                              |                                                                                                       |
| 107 g1    | my supervisor helps                     | Number | 1  | Must enter<br>Legal: 0-5                                                     | likert<br>0: Blank<br>1: Strongly a<br>2: Agree<br>3: Neither a nor d<br>4: Disagree<br>5: Strongly d |
| 107 g2    | my supervisor encourages                | Number | 1  | Must enter<br>Legal: 0-5                                                     | likert<br>0: Blank<br>1: Strongly a<br>2: Agree<br>3: Neither a nor d<br>4: Disagree<br>5: Strongly d |
| 109 g3    | my supervisor                           | Number | 1  | Must enter                                                                   | likert                                                                                                |





2: Agree  
 3: Neither a nor d  
 4: Disagree  
 5: Strongly d

|     |     |                               |            |    |                                |                                                                                                       |
|-----|-----|-------------------------------|------------|----|--------------------------------|-------------------------------------------------------------------------------------------------------|
| 120 | g14 | my supervisor<br>and I        | Number     | 1  | Must enter<br>Legal: 0-5       | likert<br>0: Blank<br>1: Strongly a<br>2: Agree<br>3: Neither a nor d<br>4: Disagree<br>5: Strongly d |
| 121 | h1  | sex                           | Number     | 1  | Must enter<br>Legal: 0-2       | sex<br>1: Male<br>2: Female<br>9: Unknown                                                             |
| 122 | h2  | dob                           | Date (dmy) | 10 | Must enter                     |                                                                                                       |
| 123 | h3  | in what type of<br>locality   | Number     | 1  | Must enter<br>Legal: 0-6       |                                                                                                       |
| 124 | h4  | educational<br>qualifications | Number     | 1  | Must enter<br>Legal: 0-6       |                                                                                                       |
| 125 | h5  | in case of mbbs               | Number     | 1  | Must enter<br>Legal: 0-2       |                                                                                                       |
| 126 | h6  | year of joining               | Number     | 4  | Must enter<br>Legal: 1950-2011 |                                                                                                       |
| 127 | h7  | how many years                | Number     | 2  | Must enter<br>Legal: 0-35      |                                                                                                       |
| 128 | h8  | type of<br>employment         | Number     | 1  | Must enter<br>Legal: 0-2       |                                                                                                       |
| 129 | h9  | if holding any<br>additional  | Text       | 49 | Must enter                     |                                                                                                       |
| 130 | h10 | type of<br>appointment        | Number     | 1  | Must enter<br>Legal: 0-2       |                                                                                                       |

For peer review only

**CONFIDENTIAL**  
For research purposes only

September 2011

**Questionnaire for health managers**  
**on training programmes, planning and supervision**

*Greetings from Institute of Public Health, Bangalore!*

This survey has been designed by Institute of Public Health, Bangalore (IPH) to better understand the factors that influence management of health facilities and health care in your district and taluka.

The study is for research purposes only and the information that you provide in this questionnaire will help us gain a better understanding of district health management and help inform policy makers.

***Please read the following carefully before starting the questionnaire.***

- 1) The success of this research depends on frank and honest answers. We would like to assure you that your individual responses would be held in complete confidence.***
- 2) We are interested in your personal views on the questions and hence there are NO right or wrong answers. So please respond frankly to all questions.***

**All answers will be kept confidential.**

| <b>FOR OFFICE USE</b>                                                             |                                                                                  |  |
|-----------------------------------------------------------------------------------|----------------------------------------------------------------------------------|--|
| <b>To be filled in by the interviewer/facilitator AFTER FINISHING THE SURVEY.</b> |                                                                                  |  |
| <b>NOT FOR RESPONDENTS</b>                                                        |                                                                                  |  |
| A1                                                                                | Respondent number                                                                |  |
| A2                                                                                | Interviewer/Facilitator name                                                     |  |
| A3                                                                                | Date<br>(DD/MM/YY eg. 26/12/2011)                                                |  |
| A4                                                                                | Time taken<br>(To be filled up at the end of the interview – <b>in minutes</b> ) |  |
| A5                                                                                | Name of person doing data entry                                                  |  |
| A6                                                                                | Data entry checked by                                                            |  |

**CONFIDENTIAL**  
For research purposes only

September 2011

**B. WHAT DO YOU THINK ABOUT NRHM PIP AND PLANNING?**

This section helps us understand your opinions about NRHM PIP and its use.

*Please tick only ONE statement on the right hand side that BEST describes how you feel about the statement on the left hand side.*

|                                                                                                                   |    |                                                                                                      |                                                                                                                                                                                                                                                                                                                                                          |
|-------------------------------------------------------------------------------------------------------------------|----|------------------------------------------------------------------------------------------------------|----------------------------------------------------------------------------------------------------------------------------------------------------------------------------------------------------------------------------------------------------------------------------------------------------------------------------------------------------------|
| 1<br>2<br>3<br>4<br>5<br>6<br>7<br>8<br>9<br>10<br>11<br>12<br>13<br>14<br>15<br>16<br>17<br>18<br>19<br>20<br>21 | B1 | The purpose of the NRHM PIP is to...                                                                 | 1 <input type="checkbox"/> Evaluate the performance of my facility during the year<br>2 <input type="checkbox"/> Collect data for planning at district or state level<br>3 <input type="checkbox"/> Planning of all activities of my facility for the year<br>4 <input type="checkbox"/> Assessment of performance of NRHM in my facility during<br>year |
| 22<br>23<br>24<br>25<br>26<br>27<br>28<br>29<br>30<br>31<br>32                                                    | B2 | If I were in charge of NRHM, the most peripheral level at which I would make the PIP would be at.... | 1 <input type="checkbox"/> State<br>2 <input type="checkbox"/> District<br>3 <input type="checkbox"/> Taluka<br>4 <input type="checkbox"/> PHC<br>5 <input type="checkbox"/> Village health and sanitation committee                                                                                                                                     |
| 33<br>34<br>35<br>36<br>37<br>38<br>39<br>40<br>41                                                                | B3 | At the PHC level, PIP should be made by...                                                           | 1 <input type="checkbox"/> PHC MO and LHV<br>2 <input type="checkbox"/> PHC MO and all field staff<br>3 <input type="checkbox"/> PHC staff, ARS and PRI members<br>4 <input type="checkbox"/> PIP should not be prepared at PHC level                                                                                                                    |
| 42<br>43<br>44<br>45<br>46<br>47<br>48<br>49<br>50<br>51<br>52<br>53<br>54<br>55<br>56<br>57<br>58                | B4 | At the taluka level, PIP should be made by...                                                        | 1 <input type="checkbox"/> THO and BPMU staff<br>2 <input type="checkbox"/> THO, BPMU along with all PHC MOs<br>3 <input type="checkbox"/> THO, BPMU and AMO<br>4 <input type="checkbox"/> THO, BPMU, AMO, ARS and PRI members<br>5 <input type="checkbox"/> PIP should not be made at taluka level                                                      |

**CONFIDENTIAL**  
For research purposes only

September 2011

|                                                                                                                                                                         |     |                                                                                                                                              |                                                                                                                                                                                                                                                                                                                                                                                                                                                                                                                                                                                                                                                                                                                                                                                                                                    |                       |              |                                   |                 |                          |
|-------------------------------------------------------------------------------------------------------------------------------------------------------------------------|-----|----------------------------------------------------------------------------------------------------------------------------------------------|------------------------------------------------------------------------------------------------------------------------------------------------------------------------------------------------------------------------------------------------------------------------------------------------------------------------------------------------------------------------------------------------------------------------------------------------------------------------------------------------------------------------------------------------------------------------------------------------------------------------------------------------------------------------------------------------------------------------------------------------------------------------------------------------------------------------------------|-----------------------|--------------|-----------------------------------|-----------------|--------------------------|
| 1<br>2<br>3<br>4<br>5<br>6<br>7<br>8<br>9<br>10<br>11<br>12<br>13<br>14<br>15<br>16<br>17<br>18<br>19<br>20<br>21<br>22<br>23<br>24<br>25<br>26<br>27<br>28<br>29<br>30 | B5  | <i>Please read each of the statements carefully.</i><br>Which statement best summarises how you feel about the role of NRHM PIP in your work | 1 <input type="checkbox"/> The role of the PIP is to collect data from village level to district level and submit to state so that micro-level data is available at the state level<br>2 <input type="checkbox"/> The PIP is a plan for my facility/taluka/district based on situation analysis which helps identify problems and find solutions<br>3 <input type="checkbox"/> PIP is one of the important requirements for obtaining resources through NRHM that must be satisfied by all health facilities in the district<br>4 <input type="checkbox"/> PIP is time-consuming and does not really help me in my routine work through the year<br>5 <input type="checkbox"/> PIP helps me budget activities based on my need and guides all my programmes and activities through the year<br>6 <input type="checkbox"/> Not sure | <b>Strongly agree</b> | <b>Agree</b> | <b>Neither agree nor disagree</b> | <b>Disagree</b> | <b>Strongly disagree</b> |
| 31<br>32<br>33<br>34<br>35                                                                                                                                              | B6  | For every PIP, we must do a situation analysis as the first step before proceeding with the planning                                         | <input type="checkbox"/> <input type="checkbox"/> <input type="checkbox"/> <input type="checkbox"/> <input type="checkbox"/>                                                                                                                                                                                                                                                                                                                                                                                                                                                                                                                                                                                                                                                                                                       |                       |              |                                   |                 |                          |
| 36<br>37<br>38<br>39                                                                                                                                                    | B7  | PIPs can be used to bring about improvement in the quality of care of facilities                                                             | <input type="checkbox"/> <input type="checkbox"/> <input type="checkbox"/> <input type="checkbox"/> <input type="checkbox"/>                                                                                                                                                                                                                                                                                                                                                                                                                                                                                                                                                                                                                                                                                                       |                       |              |                                   |                 |                          |
| 40<br>41<br>42<br>43                                                                                                                                                    | B8  | Districts need technical guidance in carrying out a situation analysis for the PIP                                                           | <input type="checkbox"/> <input type="checkbox"/> <input type="checkbox"/> <input type="checkbox"/> <input type="checkbox"/>                                                                                                                                                                                                                                                                                                                                                                                                                                                                                                                                                                                                                                                                                                       |                       |              |                                   |                 |                          |
| 44<br>45<br>46<br>47                                                                                                                                                    | B9  | Talukas need technical guidance in carrying out a situation analysis for PIP                                                                 | <input type="checkbox"/> <input type="checkbox"/> <input type="checkbox"/> <input type="checkbox"/> <input type="checkbox"/>                                                                                                                                                                                                                                                                                                                                                                                                                                                                                                                                                                                                                                                                                                       |                       |              |                                   |                 |                          |
| 48<br>49<br>50<br>51                                                                                                                                                    | B10 | PHCs need technical guidance in carrying out situation analysis for PIP                                                                      | <input type="checkbox"/> <input type="checkbox"/> <input type="checkbox"/> <input type="checkbox"/> <input type="checkbox"/>                                                                                                                                                                                                                                                                                                                                                                                                                                                                                                                                                                                                                                                                                                       |                       |              |                                   |                 |                          |
| 52<br>53<br>54<br>55                                                                                                                                                    | B11 | PIP preparation at taluka level improves teamwork among doctors, nurses and BPMs                                                             | <input type="checkbox"/> <input type="checkbox"/> <input type="checkbox"/> <input type="checkbox"/> <input type="checkbox"/>                                                                                                                                                                                                                                                                                                                                                                                                                                                                                                                                                                                                                                                                                                       |                       |              |                                   |                 |                          |
| 56<br>57<br>58<br>59<br>60                                                                                                                                              | B12 | I am able to negotiate the priorities of my facility with my superiors so that they could be included in the district PIP                    | <input type="checkbox"/> <input type="checkbox"/> <input type="checkbox"/> <input type="checkbox"/> <input type="checkbox"/>                                                                                                                                                                                                                                                                                                                                                                                                                                                                                                                                                                                                                                                                                                       |                       |              |                                   |                 |                          |

3

For any clarifications regarding this survey, please contact the facilitator who is administering this survey or contact:  
Dr. Prashanth NS, Institute of Public Health, Bangalore. Phone: [REDACTED]

**CONFIDENTIAL**  
For research purposes only

September 2011

|     |                                                                                                                                                                     | <b>Strongly agree</b>    | <b>Agree</b>             | <b>Neither agree nor disagree</b> | <b>Disagree</b>          | <b>Strongly disagree</b> |
|-----|---------------------------------------------------------------------------------------------------------------------------------------------------------------------|--------------------------|--------------------------|-----------------------------------|--------------------------|--------------------------|
| B13 | In this year's PIP (December 2010), we collected data to do a situation analysis for my facility                                                                    | <input type="checkbox"/> | <input type="checkbox"/> | <input type="checkbox"/>          | <input type="checkbox"/> | <input type="checkbox"/> |
| B14 | The activities that we included in the PIP were based on a situation analysis of my facility                                                                        | <input type="checkbox"/> | <input type="checkbox"/> | <input type="checkbox"/>          | <input type="checkbox"/> | <input type="checkbox"/> |
| B15 | After the NRHM PIP process has started, problems in my facility are being better identified than before                                                             | <input type="checkbox"/> | <input type="checkbox"/> | <input type="checkbox"/>          | <input type="checkbox"/> | <input type="checkbox"/> |
| B16 | After the submission of PIP, I come to know soon about the financial allocation for my facility                                                                     | <input type="checkbox"/> | <input type="checkbox"/> | <input type="checkbox"/>          | <input type="checkbox"/> | <input type="checkbox"/> |
| B17 | In my district, most of my colleagues at the taluka level were actively involved in preparing the PIP this year                                                     | <input type="checkbox"/> | <input type="checkbox"/> | <input type="checkbox"/>          | <input type="checkbox"/> | <input type="checkbox"/> |
| B18 | In my district, most PHCs were also actively involved in preparing the PIP                                                                                          | <input type="checkbox"/> | <input type="checkbox"/> | <input type="checkbox"/>          | <input type="checkbox"/> | <input type="checkbox"/> |
| B19 | In my facility, all the staff participated in preparing the PIP                                                                                                     | <input type="checkbox"/> | <input type="checkbox"/> | <input type="checkbox"/>          | <input type="checkbox"/> | <input type="checkbox"/> |
| B20 | I am able to discuss and negotiate with Panchayat members regarding utilisation of the various joint funds (untied funds/ARS funds and other joint signatory funds) | <input type="checkbox"/> | <input type="checkbox"/> | <input type="checkbox"/>          | <input type="checkbox"/> | <input type="checkbox"/> |

**CONFIDENTIAL**  
For research purposes only

September 2011

**C. HOW DO YOU RELATE TO YOUR ORGANISATION?**

In this section, we ask you questions about how you feel about your organisation. For this section, "ORGANISATION" means your hospital/taluka/district depending on where you work.

|     |                                                                                                 | Strongly agree           | Agree                    | Neither agree nor disagree | Disagree                 | Strongly disagree        |
|-----|-------------------------------------------------------------------------------------------------|--------------------------|--------------------------|----------------------------|--------------------------|--------------------------|
| C1  | It is difficult for me to leave the organization right now, even if I wanted to leave           | <input type="checkbox"/> | <input type="checkbox"/> | <input type="checkbox"/>   | <input type="checkbox"/> | <input type="checkbox"/> |
| C2  | I would not leave my present organisation right now because of a sense of obligation            | <input type="checkbox"/> | <input type="checkbox"/> | <input type="checkbox"/>   | <input type="checkbox"/> | <input type="checkbox"/> |
| C3  | I would be very happy to spend rest of my career in this organization                           | <input type="checkbox"/> | <input type="checkbox"/> | <input type="checkbox"/>   | <input type="checkbox"/> | <input type="checkbox"/> |
| C4  | I will not leave the organisation right now mainly because there are not many choices available | <input type="checkbox"/> | <input type="checkbox"/> | <input type="checkbox"/>   | <input type="checkbox"/> | <input type="checkbox"/> |
| C5  | Even if it were to my advantage, I do not feel it would be right to leave the organisation now  | <input type="checkbox"/> | <input type="checkbox"/> | <input type="checkbox"/>   | <input type="checkbox"/> | <input type="checkbox"/> |
| C6  | I really feel as if my organisation's problems are my own                                       | <input type="checkbox"/> | <input type="checkbox"/> | <input type="checkbox"/>   | <input type="checkbox"/> | <input type="checkbox"/> |
| C7  | Right now, staying in this organisation is both a necessity and a desire.                       | <input type="checkbox"/> | <input type="checkbox"/> | <input type="checkbox"/>   | <input type="checkbox"/> | <input type="checkbox"/> |
| C8  | I do not feel a strong sense of "belonging" to my organisation                                  | <input type="checkbox"/> | <input type="checkbox"/> | <input type="checkbox"/>   | <input type="checkbox"/> | <input type="checkbox"/> |
| C9  | I think that there are very few options for me to consider leaving this organisation            | <input type="checkbox"/> | <input type="checkbox"/> | <input type="checkbox"/>   | <input type="checkbox"/> | <input type="checkbox"/> |
| C10 | I do not feel emotionally attached to this organisation                                         | <input type="checkbox"/> | <input type="checkbox"/> | <input type="checkbox"/>   | <input type="checkbox"/> | <input type="checkbox"/> |
| C11 | I would feel guilty if I leave this organisation right now                                      | <input type="checkbox"/> | <input type="checkbox"/> | <input type="checkbox"/>   | <input type="checkbox"/> | <input type="checkbox"/> |
| C12 | I do not feel like "part of a family" at my workplace                                           | <input type="checkbox"/> | <input type="checkbox"/> | <input type="checkbox"/>   | <input type="checkbox"/> | <input type="checkbox"/> |

**CONFIDENTIAL**  
For research purposes only

September 2011

|     |                                                                                                                                 | <b>Strongly agree</b>    | <b>Agree</b>             | <b>Neither agree nor disagree</b> | <b>Disagree</b>          | <b>Strongly disagree</b> |
|-----|---------------------------------------------------------------------------------------------------------------------------------|--------------------------|--------------------------|-----------------------------------|--------------------------|--------------------------|
| C13 | This organization deserves my loyalty                                                                                           | <input type="checkbox"/> | <input type="checkbox"/> | <input type="checkbox"/>          | <input type="checkbox"/> | <input type="checkbox"/> |
| C14 | I might consider working elsewhere if I had not already put so much of myself into this organisation                            | <input type="checkbox"/> | <input type="checkbox"/> | <input type="checkbox"/>          | <input type="checkbox"/> | <input type="checkbox"/> |
| C15 | I would not consider leaving the organisation right now because I feel a sense of obligation to the people in this organisation | <input type="checkbox"/> | <input type="checkbox"/> | <input type="checkbox"/>          | <input type="checkbox"/> | <input type="checkbox"/> |
| C16 | This organisation has a great deal of personal meaning for me                                                                   | <input type="checkbox"/> | <input type="checkbox"/> | <input type="checkbox"/>          | <input type="checkbox"/> | <input type="checkbox"/> |
| C17 | Too much of my personal life would be disturbed if I wanted to leave this organisation right now                                | <input type="checkbox"/> | <input type="checkbox"/> | <input type="checkbox"/>          | <input type="checkbox"/> | <input type="checkbox"/> |
| C18 | I owe a great deal to my organization                                                                                           | <input type="checkbox"/> | <input type="checkbox"/> | <input type="checkbox"/>          | <input type="checkbox"/> | <input type="checkbox"/> |



**CONFIDENTIAL**  
For research purposes only

September 2011

**D. HOW CONFIDENT ARE YOU WITH RESPECT TO YOUR EFFICACY AT DEALING WITH PRI MEMBER DEMANDS?**

*Think about a situation such as a conflict with a PRI or community member making what you feel are unreasonable demands on your time/staff or resources.*

Given that you face such circumstances routinely, please rate how certain you are that you can do each of the things described below by circling the number from 0 – 100 that best captures your degree of confidence.

Rate your degree of confidence by recording a number from 0 to 100 using the scale given below:

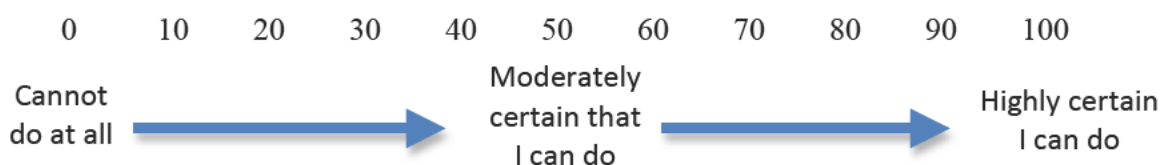

|    |                                                                           | <b>CIRCLE BASED ON THE SCALE GIVEN ABOVE</b> |    |    |    |    |    |    |    |    |    |     |
|----|---------------------------------------------------------------------------|----------------------------------------------|----|----|----|----|----|----|----|----|----|-----|
| D1 | I can solve difficult problems if I try hard enough                       | 0                                            | 10 | 20 | 30 | 40 | 50 | 60 | 70 | 80 | 90 | 100 |
| D2 | If someone opposes me, I can find ways to get what I want                 | 0                                            | 10 | 20 | 30 | 40 | 50 | 60 | 70 | 80 | 90 | 100 |
| D3 | It is easy for me to stick to my aims and accomplish my goals             | 0                                            | 10 | 20 | 30 | 40 | 50 | 60 | 70 | 80 | 90 | 100 |
| D4 | I am confident that I could deal efficiently with unexpected events       | 0                                            | 10 | 20 | 30 | 40 | 50 | 60 | 70 | 80 | 90 | 100 |
| D5 | Thanks to my strategic nature, I know how to handle unexpected situations | 0                                            | 10 | 20 | 30 | 40 | 50 | 60 | 70 | 80 | 90 | 100 |

**CONFIDENTIAL**  
For research purposes only

September 2011

|     |                                                                                      |   |    |    |    |    |    |    |    |    |    |     |
|-----|--------------------------------------------------------------------------------------|---|----|----|----|----|----|----|----|----|----|-----|
| D6  | I can solve most problems if I invest the necessary effort                           | 0 | 10 | 20 | 30 | 40 | 50 | 60 | 70 | 80 | 90 | 100 |
| D7  | I can remain calm when facing difficulties because I can rely on my coping abilities | 0 | 10 | 20 | 30 | 40 | 50 | 60 | 70 | 80 | 90 | 100 |
| D8  | When I am confronted with a problem, I can usually find several solutions            | 0 | 10 | 20 | 30 | 40 | 50 | 60 | 70 | 80 | 90 | 100 |
| D9  | If I am in trouble, I can usually think of something to do                           | 0 | 10 | 20 | 30 | 40 | 50 | 60 | 70 | 80 | 90 | 100 |
| D10 | No matter what comes my way, I'm usually able to handle it                           | 0 | 10 | 20 | 30 | 40 | 50 | 60 | 70 | 80 | 90 | 100 |

**E: WHAT WAS THE NATURE OF TRAINING PROGRAMMES IN YOUR DISTRICT?**

For those in Tumkur district, please answer this section with respect to the Swasthya Karnataka training programme.

|    |                                                                                                                                                    | Response<br><i>Tick your response wherever there is a box.<br/>Elsewhere, please write your response</i> |
|----|----------------------------------------------------------------------------------------------------------------------------------------------------|----------------------------------------------------------------------------------------------------------|
| E1 | District                                                                                                                                           | 1 <input type="checkbox"/> Tumkur<br>2 <input type="checkbox"/> Raichur                                  |
| E2 | Taluka where your work                                                                                                                             |                                                                                                          |
| E3 | Primary designation                                                                                                                                |                                                                                                          |
| E4 | How long have you held your present designation<br><i>(In years, including period on contract.<br/>Write &lt;1 if held for less than one year)</i> |                                                                                                          |

**CONFIDENTIAL**  
For research purposes only

September 2011

|                                                                                                                                                                   |                                                                                                                                                                       |                                                                                                                                                                                           |                                                                                                                                                                                                                                                                                                                                                                                                                                                                                                                                                                                                                                                                                                                                                                                                                                                                                                                                                              |
|-------------------------------------------------------------------------------------------------------------------------------------------------------------------|-----------------------------------------------------------------------------------------------------------------------------------------------------------------------|-------------------------------------------------------------------------------------------------------------------------------------------------------------------------------------------|--------------------------------------------------------------------------------------------------------------------------------------------------------------------------------------------------------------------------------------------------------------------------------------------------------------------------------------------------------------------------------------------------------------------------------------------------------------------------------------------------------------------------------------------------------------------------------------------------------------------------------------------------------------------------------------------------------------------------------------------------------------------------------------------------------------------------------------------------------------------------------------------------------------------------------------------------------------|
| 1<br>2<br>3<br>4<br>5<br>6<br>7<br>8<br>9<br>10<br>11<br>12<br>13<br>14<br>15<br>16<br>17<br>18<br>19<br>20<br>21<br>22<br>23<br>24<br>25<br>26<br>27<br>28<br>29 | E5                                                                                                                                                                    | <p>Which among these topics were covered in the training programmes you attended in the last two years (2009-2011)?</p> <p><i>Circle how many ever topics that apply</i></p>              | <p>1 <input type="checkbox"/> Concepts in public health</p> <p>2 <input type="checkbox"/> Leadership</p> <p>3 <input type="checkbox"/> Planning</p> <p>4 <input type="checkbox"/> Human resources planning &amp; Motivation</p> <p>5 <input type="checkbox"/> Administrative procedures</p> <p>6 <input type="checkbox"/> Health and hospital management</p> <p>7 <input type="checkbox"/> HMIS</p> <p>8 <input type="checkbox"/> Health and hospital management</p> <p>9 <input type="checkbox"/> Financial and medico-legal procedures</p> <p>10 <input type="checkbox"/> Teamwork</p> <p>11 <input type="checkbox"/> Emergency Obstetric Care</p> <p>12 <input type="checkbox"/> Role of PRI in health system</p> <p>13 <input type="checkbox"/> NRHM PIP planning</p> <p>14 <input type="checkbox"/> Supportive supervision</p> <p>15 <input type="checkbox"/> Quality in health care</p> <p>16 <input type="checkbox"/> Other topic not listed here</p> |
| 30<br>31<br>32                                                                                                                                                    | <p><i>If you have not participated in the Swasthya Karnataka Training Programme, then skip the rest of this section and proceed to Section F on the next page</i></p> |                                                                                                                                                                                           |                                                                                                                                                                                                                                                                                                                                                                                                                                                                                                                                                                                                                                                                                                                                                                                                                                                                                                                                                              |
| 33<br>34<br>35<br>36<br>37<br>38                                                                                                                                  | E6                                                                                                                                                                    | <p>Have you attended the Swasthya Karnataka training programme?</p>                                                                                                                       | <p>1 <input type="checkbox"/> YES</p> <p>2 <input type="checkbox"/> NO</p> <p>3 <input type="checkbox"/> Not sure</p>                                                                                                                                                                                                                                                                                                                                                                                                                                                                                                                                                                                                                                                                                                                                                                                                                                        |
| 39<br>40<br>41<br>42<br>43<br>44<br>45<br>46<br>47                                                                                                                | E7                                                                                                                                                                    | <p><b>IF YES</b>, which components of the Swasthya Karnataka training programme have you attended?</p>                                                                                    | <p>1 <input type="checkbox"/> Contact classes</p> <p>2 <input type="checkbox"/> Discussion with Swasthya Karnataka trainers during visits to my facility/institution</p> <p>3 <input type="checkbox"/> Both</p> <p>4 <input type="checkbox"/> Not sure</p>                                                                                                                                                                                                                                                                                                                                                                                                                                                                                                                                                                                                                                                                                                   |
| 48<br>49<br>50<br>51<br>52                                                                                                                                        | E8                                                                                                                                                                    | <p>In the Swasthya Karnataka training programme, how many classes did you attend? (Max N=12)</p> <p><i>(Each class consisted of one or more consecutive days of contact sessions)</i></p> |                                                                                                                                                                                                                                                                                                                                                                                                                                                                                                                                                                                                                                                                                                                                                                                                                                                                                                                                                              |
| 53<br>54<br>55<br>56<br>57                                                                                                                                        | E9                                                                                                                                                                    | <p>Have you been visited by Swasthya Karnataka trainers at your facility for helping you apply what was covered in the classes?</p>                                                       | <p>1 <input type="checkbox"/> YES</p> <p>2 <input type="checkbox"/> NO</p> <p>3 <input type="checkbox"/> Don't know</p>                                                                                                                                                                                                                                                                                                                                                                                                                                                                                                                                                                                                                                                                                                                                                                                                                                      |
| 58<br>59<br>60                                                                                                                                                    | E10                                                                                                                                                                   | <p><b>IF YES</b>, how many times have you been visited by Swasthya Karnataka trainers in the last two years?</p>                                                                          |                                                                                                                                                                                                                                                                                                                                                                                                                                                                                                                                                                                                                                                                                                                                                                                                                                                                                                                                                              |

**CONFIDENTIAL**  
For research purposes only

September 2011

**F. WHAT DO YOU THINK ABOUT THE TRAINING PROGRAMMES IN YOUR DISTRICT?**

Please respond to this section based on your experience with the Swasthya Karnataka programme. If you have not attended the Swasthya Karnataka programme, then please respond keeping in mind the training programmes in your district that dealt with NRHM PIP planning or supervision in the last two years.

*Tick the response that best captures what you think about each statement.*

|    |                                                                                                                                        | Strongly agree           | Agree                    | Neither agree nor disagree | Disagree                 | Strongly disagree        | Not applicable           |
|----|----------------------------------------------------------------------------------------------------------------------------------------|--------------------------|--------------------------|----------------------------|--------------------------|--------------------------|--------------------------|
| F1 | The content of the classroom teaching during the training programmes were relevant to my work                                          | <input type="checkbox"/> | <input type="checkbox"/> | <input type="checkbox"/>   | <input type="checkbox"/> | <input type="checkbox"/> | <input type="checkbox"/> |
| F2 | After attending the classes, my knowledge on the topics taught improved                                                                | <input type="checkbox"/> | <input type="checkbox"/> | <input type="checkbox"/>   | <input type="checkbox"/> | <input type="checkbox"/> | <input type="checkbox"/> |
| F3 | After the classes, I can better understand the importance of NRHM PIP in managing the services under my responsibility                 | <input type="checkbox"/> | <input type="checkbox"/> | <input type="checkbox"/>   | <input type="checkbox"/> | <input type="checkbox"/> | <input type="checkbox"/> |
| F4 | The visits by trainers motivated me to apply new skills learnt during the training                                                     | <input type="checkbox"/> | <input type="checkbox"/> | <input type="checkbox"/>   | <input type="checkbox"/> | <input type="checkbox"/> | <input type="checkbox"/> |
| F5 | The visits by the trainers motivated me to implement changes to improve in my institution                                              | <input type="checkbox"/> | <input type="checkbox"/> | <input type="checkbox"/>   | <input type="checkbox"/> | <input type="checkbox"/> | <input type="checkbox"/> |
| F6 | The visits by trainers to my workplace help me to discuss problems I faced in applying what is taught in classroom training programmes | <input type="checkbox"/> | <input type="checkbox"/> | <input type="checkbox"/>   | <input type="checkbox"/> | <input type="checkbox"/> | <input type="checkbox"/> |
| F7 | Working on assignments given during the training along with my colleagues and subordinates improved teamwork in my organisation.       | <input type="checkbox"/> | <input type="checkbox"/> | <input type="checkbox"/>   | <input type="checkbox"/> | <input type="checkbox"/> | <input type="checkbox"/> |
| F8 | Because of the discussion with my colleagues and subordinates during trainers' visit, their confidence in me as a manager increased    | <input type="checkbox"/> | <input type="checkbox"/> | <input type="checkbox"/>   | <input type="checkbox"/> | <input type="checkbox"/> | <input type="checkbox"/> |



**CONFIDENTIAL**  
For research purposes only

September 2011

|                                                                                                                                                                                        |     |                                                                                                                                                                                              |                                                                                                                                                                                                                                                                                                                                                                                                                                                                                                                                                                                                                                                                                                               |
|----------------------------------------------------------------------------------------------------------------------------------------------------------------------------------------|-----|----------------------------------------------------------------------------------------------------------------------------------------------------------------------------------------------|---------------------------------------------------------------------------------------------------------------------------------------------------------------------------------------------------------------------------------------------------------------------------------------------------------------------------------------------------------------------------------------------------------------------------------------------------------------------------------------------------------------------------------------------------------------------------------------------------------------------------------------------------------------------------------------------------------------|
| 1<br>2<br>3<br>4<br>5<br>6<br>7<br>8<br>9<br>10<br>11<br>12<br>13<br>14<br>15<br>16<br>17<br>18<br>19<br>20<br>21<br>22<br>23<br>24                                                    | F13 | <p><b>If you answered YES to the previous question,</b><br/>In the space provided, please give TWO examples of how you improved your supervision practices after the training programme.</p> | <p>1)</p> <p>2)</p> <p><input type="checkbox"/> Not applicable because I answered NO/Not sure to Question F9</p>                                                                                                                                                                                                                                                                                                                                                                                                                                                                                                                                                                                              |
| 25<br>26<br>27<br>28<br>29<br>30<br>31<br>32<br>33<br>34<br>35<br>36<br>37<br>38<br>39<br>40<br>41<br>42<br>43<br>44<br>45<br>46<br>47<br>48<br>49<br>50<br>51<br>52<br>53<br>54<br>55 | F14 | <p><b>If you answered NO to F12,</b><br/>What were the main reasons for not making any improvements in your supervision practices?<br/><br/><i>(Tick as many as appropriate)</i></p>         | <p>1 <input type="checkbox"/> The training did not provide any help in improving supervision of staff</p> <p>2 <input type="checkbox"/> There are several constraints in the organisation that prevent me from changing supervision practices</p> <p>3 <input type="checkbox"/> I do not have the necessary technical skills/knowledge to bring about improvements</p> <p>4 <input type="checkbox"/> It is not within my power to make such changes</p> <p>5 <input type="checkbox"/> I do not supervise anybody</p> <p>6 <input type="checkbox"/> Other – Please specify in the space below</p> <p>7 <input type="checkbox"/> This question is <b>not applicable</b> to me because I answered YES to F12</p> |

**CONFIDENTIAL**  
For research purposes only

September 2011

**G. WHAT ARE YOUR OPINIONS ABOUT SUPERVISION BY YOUR IMMEDIATE SUPERIOR?**

This section is about your experience with supervision and supervision visits. For this section, your supervisor is the person you **report to**, and who supervises your work. This is usually an officer one rank above you. For example, a BPM is supervised by THO, while THO's are supervised by DHO. DHO's and programme officers are supervised by Directors or Joint Directors respectively. PHC MOs are supervised by THOs.

|     |                                                                                                                                | <b>Strongly agree</b>    | <b>Agree</b>             | <b>Neither agree nor disagree</b> | <b>Disagree</b>          | <b>Strongly disagree</b> |
|-----|--------------------------------------------------------------------------------------------------------------------------------|--------------------------|--------------------------|-----------------------------------|--------------------------|--------------------------|
| G1  | My supervisor helps me solve work-related problems such as implementation issues with new schemes or problems with PRI members | <input type="checkbox"/> | <input type="checkbox"/> | <input type="checkbox"/>          | <input type="checkbox"/> | <input type="checkbox"/> |
| G2  | My supervisor encourages us to speak up when we have a different opinion on a decision he has taken                            | <input type="checkbox"/> | <input type="checkbox"/> | <input type="checkbox"/>          | <input type="checkbox"/> | <input type="checkbox"/> |
| G3  | My supervisor leaves it entirely up to me to decide how to go about doing my job                                               | <input type="checkbox"/> | <input type="checkbox"/> | <input type="checkbox"/>          | <input type="checkbox"/> | <input type="checkbox"/> |
| G4  | My supervisor encourages me to learn new things related to my work                                                             | <input type="checkbox"/> | <input type="checkbox"/> | <input type="checkbox"/>          | <input type="checkbox"/> | <input type="checkbox"/> |
| G5  | My supervisor does not explain his or her actions or decisions                                                                 | <input type="checkbox"/> | <input type="checkbox"/> | <input type="checkbox"/>          | <input type="checkbox"/> | <input type="checkbox"/> |
| G6  | My supervisor knows my reaction to various issues at work                                                                      | <input type="checkbox"/> | <input type="checkbox"/> | <input type="checkbox"/>          | <input type="checkbox"/> | <input type="checkbox"/> |
| G7  | My supervisor helps me take important decisions                                                                                | <input type="checkbox"/> | <input type="checkbox"/> | <input type="checkbox"/>          | <input type="checkbox"/> | <input type="checkbox"/> |
| G8  | My supervisor does not give me a chance to make important decisions on my own                                                  | <input type="checkbox"/> | <input type="checkbox"/> | <input type="checkbox"/>          | <input type="checkbox"/> | <input type="checkbox"/> |
| G9  | My supervisor trusts my actions and <i>vice versa</i>                                                                          | <input type="checkbox"/> | <input type="checkbox"/> | <input type="checkbox"/>          | <input type="checkbox"/> | <input type="checkbox"/> |
| G10 | My supervisor recognises and praises good performance                                                                          | <input type="checkbox"/> | <input type="checkbox"/> | <input type="checkbox"/>          | <input type="checkbox"/> | <input type="checkbox"/> |
| G11 | My supervisor is always around checking on how I am working                                                                    | <input type="checkbox"/> | <input type="checkbox"/> | <input type="checkbox"/>          | <input type="checkbox"/> | <input type="checkbox"/> |

**CONFIDENTIAL**  
For research purposes only

September 2011

|     |                                                             | Strongly agree           | Agree                    | Neither agree nor disagree | Disagree                 | Strongly disagree        |
|-----|-------------------------------------------------------------|--------------------------|--------------------------|----------------------------|--------------------------|--------------------------|
| G12 | My supervisor decides and tells me what to do and how to do | <input type="checkbox"/> | <input type="checkbox"/> | <input type="checkbox"/>   | <input type="checkbox"/> | <input type="checkbox"/> |
| G13 | My supervisor finds fault in most of what I do              | <input type="checkbox"/> | <input type="checkbox"/> | <input type="checkbox"/>   | <input type="checkbox"/> | <input type="checkbox"/> |
| G14 | My supervisor and I both respect each other                 | <input type="checkbox"/> | <input type="checkbox"/> | <input type="checkbox"/>   | <input type="checkbox"/> | <input type="checkbox"/> |

**H. PLEASE TELL US ABOUT YOURSELF.**

|    |                                                     | Response                                                                                                                                                                                                                                                                                                                                                                                                                                                 |
|----|-----------------------------------------------------|----------------------------------------------------------------------------------------------------------------------------------------------------------------------------------------------------------------------------------------------------------------------------------------------------------------------------------------------------------------------------------------------------------------------------------------------------------|
| H1 | Sex                                                 | 1 <input type="checkbox"/> Male<br>2 <input type="checkbox"/> Female                                                                                                                                                                                                                                                                                                                                                                                     |
| H2 | Date of birth<br>DD/MM/YYYY<br>(eg. 26/12/2011)     |                                                                                                                                                                                                                                                                                                                                                                                                                                                          |
| H3 | In what type of locality did you go to high school? | 1 <input type="checkbox"/> Rural (Village/Hobli)<br>2 <input type="checkbox"/> Semi-rural (Taluka town)<br>3 <input type="checkbox"/> Semi-urban (District HQ excluding Bangalore, Mysore, Mangalore, Hubli-Dharwad, Tumkur and Belgaum)<br>4 <input type="checkbox"/> Urban except Bangalore (Mysore, Mangalore, Hubli-Dharwad, Tumkur and Belgaum)<br>5 <input type="checkbox"/> Bangalore<br>6 <input type="checkbox"/> Other place outside Karnataka |



**CONFIDENTIAL**  
For research purposes only

September 2011

|                                                                                           |     |                                                                 |                                                                                                                                                                                                                                                                                                                                                                 |
|-------------------------------------------------------------------------------------------|-----|-----------------------------------------------------------------|-----------------------------------------------------------------------------------------------------------------------------------------------------------------------------------------------------------------------------------------------------------------------------------------------------------------------------------------------------------------|
| 1<br>2<br>3<br>4<br>5<br>6<br>7<br>8<br>9<br>10<br>11<br>12<br>13<br>14<br>15<br>16<br>17 | H4  | Educational qualifications<br><b>(TICK AS MANY THAT APPLY)</b>  | 1 <input type="checkbox"/> MBBS<br>2 <input type="checkbox"/> PG medical degree (MD/MS, Diploma etc)<br>3 <input type="checkbox"/> Nursing degree (Bachelor/Diploma)<br>4 <input type="checkbox"/> Management degree (MBA/BBM or equivalent)<br>5 <input type="checkbox"/> Other graduate degree<br>6 <input type="checkbox"/> Other degree not mentioned above |
| 18<br>19<br>20<br>21<br>22                                                                | H5  | In case of MBBS, what type of medical college did you study in? | 1 <input type="checkbox"/> Private medical college<br>2 <input type="checkbox"/> Government medical college                                                                                                                                                                                                                                                     |
| 23<br>24<br>25                                                                            | H6  | Year of joining service                                         |                                                                                                                                                                                                                                                                                                                                                                 |
| 26<br>27<br>28<br>29                                                                      | H7  | How many years have you worked in this district?                | _____ Years                                                                                                                                                                                                                                                                                                                                                     |
| 30<br>31<br>32<br>33                                                                      | H8  | Type of employment (Presently)                                  | 1 <input type="checkbox"/> Permanent in this post<br>2 <input type="checkbox"/> Temporarily in-charge                                                                                                                                                                                                                                                           |
| 34<br>35<br>36<br>37<br>38                                                                | H9  | If holding any additional charge, mention which post            | <hr style="border: 1px solid black;"/> <input type="checkbox"/> No additional charge held                                                                                                                                                                                                                                                                       |
| 39<br>40<br>41<br>42<br>43<br>44<br>45<br>46<br>47                                        | H10 | Type of appointment                                             | 1 <input type="checkbox"/> Contract<br>2 <input type="checkbox"/> Regular                                                                                                                                                                                                                                                                                       |

**Thank you for your time and patience**

--

## Interview guide

Greetings and introduce

Explanation about the research

Consent for recording the interview.

- 1) As a \_\_\_\_\_(Designation)\_\_\_\_\_, what is your role in the PIP?

**Notes:** *This question should ideally provide information on knowledge of the interviewee about the PIP process under NRHM. It should also reveal the interviewee's perceived involvement in the PIP. If interviewee suggests minimum role, ask whether he thinks he should be involved. What prevented him from involving.*

- 2) How was the PIP for this year for your district prepared?

**Tags:** Can you explain the whole process from the beginning?

**Notes:** This question is the key question of the interview, which is expected to capture the role played by the interviewee in this year's PIP. Details of when the process began, what obstacles were met and how s/he went about the process needs to be captured. Also, the interviewee's perceptions about who were involved in the PIP, and their roles should emerge.

**Probes:** When did you start (Probe for communication from directorate)?

Who was involved and what was the nature of involvement? Also, according to you, have everybody been involved to the extent needed?

(Probe specifically for PHCs, VHSCs, ANMs, ASHAs, Anganwadi workers and people from other departments – primary education, women and child development if they are left out by the interviewee)

How did you begin the process of making the plan? Who took the lead within the district to make the plan?

**Tags:** Meetings, orientation, other communication, emails. Outcomes of these.

What were the difficulties you faced in the process of making PIP(Probe for orientation on involvement)

**Tags:** time constraints, lack of consensus, poor understanding on process by some, role conflicts

How did you feel about the process of making the PIP this year?

What do you feel about the PIP?

1  
2  
3 3) Under NRHM according to guidelines, the district is supposed to involve  
4 communities right from village to the top administration in the district. What do you think of  
5 such a process?  
6  
7

8 **Notes:** This question is expected to capture the attitudes of the interviewee to bottom-up  
9 planning, his perceptions about the feasibility of such a process and encourage the  
10 participant to reflect on how such a process can be implemented, if at all. If interviewee  
11 agrees flatly to such a process, we need to discuss what s/he means by “participation” and  
12 “involvement”. What is the extent of involvement of communities that they expect, if at all  
13 they do see a role. The interviewer adopts a tone that questions the need for bottom-up  
14 planning to bring out the attitudes towards this.  
15  
16  
17

18 **Probes:** Probe for feasibility in the district/area and attitudes towards involvement of  
19 various health staff and officials at all levels in planning in general.  
20  
21  
22

23 Is it necessary to involve communities right from village level? Does this help in making an  
24 effective plan?  
25  
26

27 Can you suggest a better approach to planning at district/taluka/PHC/village/area level?  
28  
29  
30  
31  
32  
33  
34  
35  
36  
37  
38  
39  
40  
41  
42  
43  
44  
45  
46  
47  
48  
49  
50  
51  
52  
53  
54  
55  
56  
57  
58  
59  
60

1  
2  
3  
4  
5  
6  
7  
8  
9  
10  
11  
12  
13  
14  
15  
16  
17  
18  
19  
20  
21  
22  
23  
24  
25  
26  
27  
28  
29  
30  
31  
32  
33  
34  
35  
36  
37  
38  
39  
40  
41  
42  
43  
44  
45  
46  
47  
48  
49  
50  
51  
52  
53  
54  
55  
56  
57  
58  
59  
60

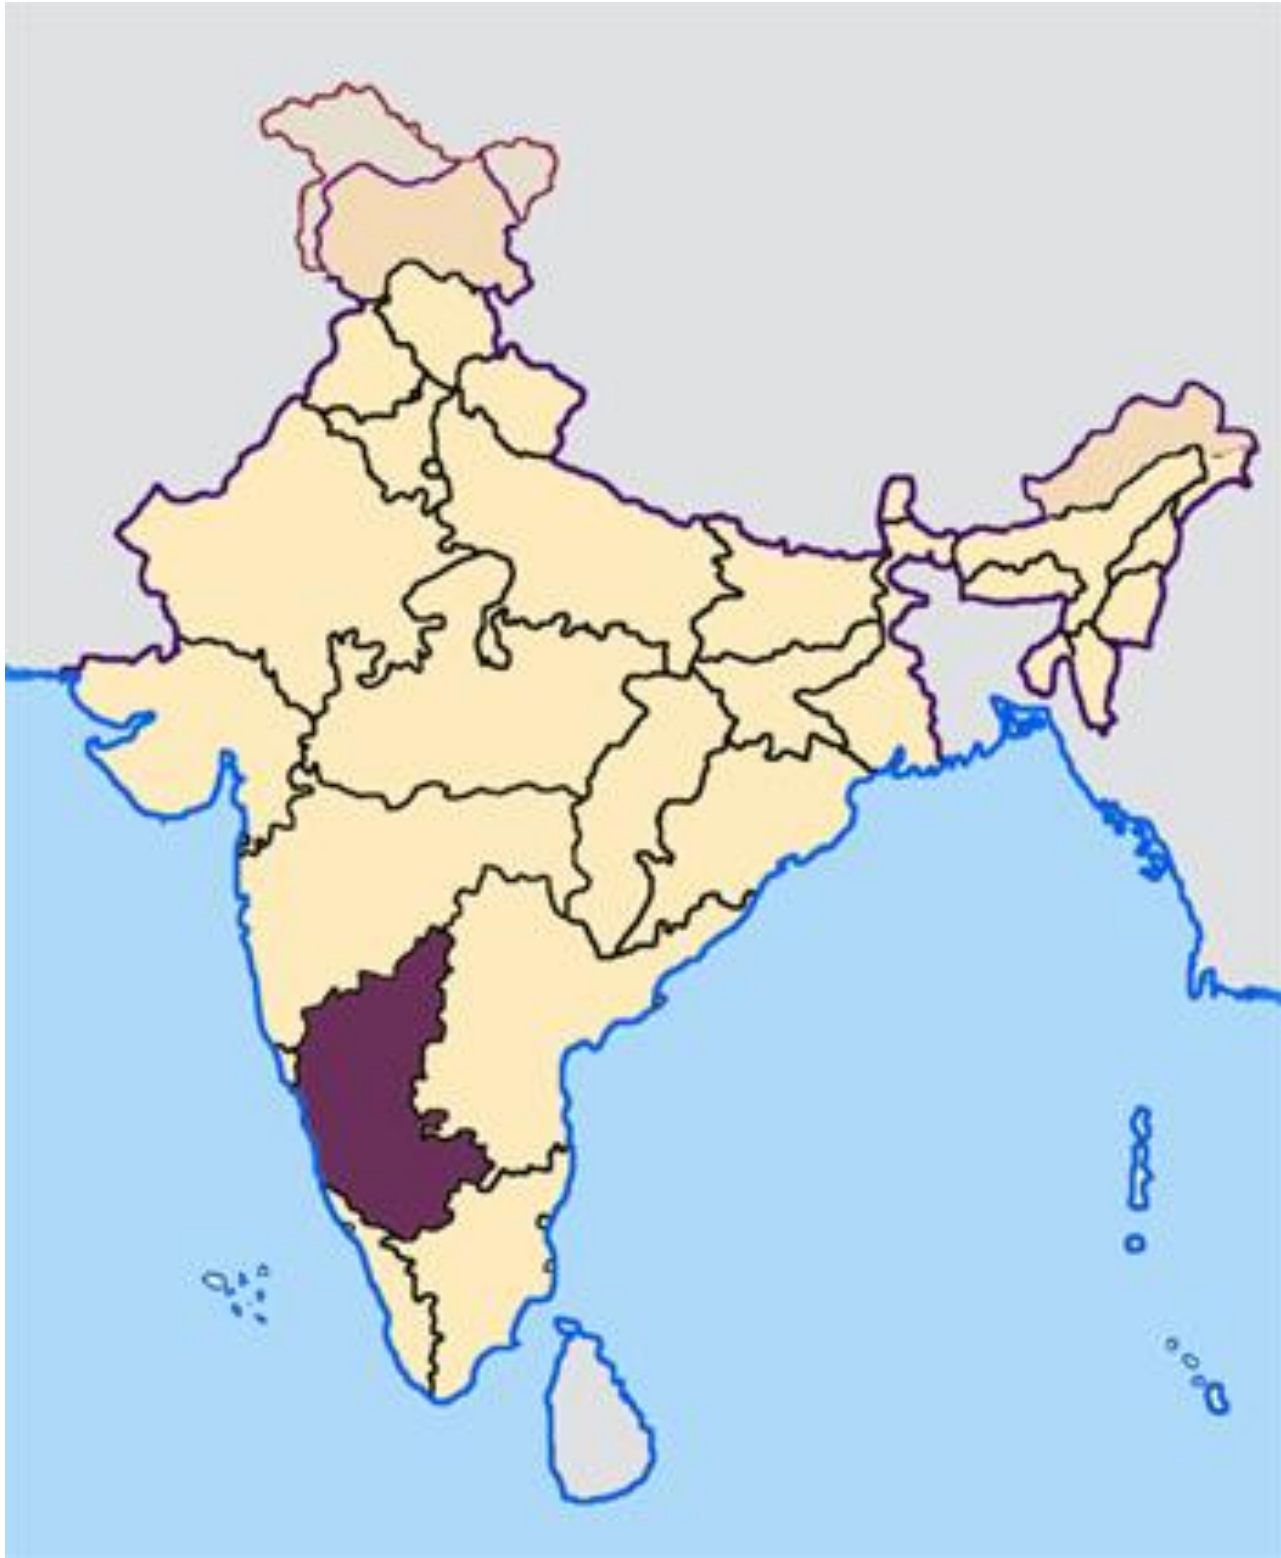

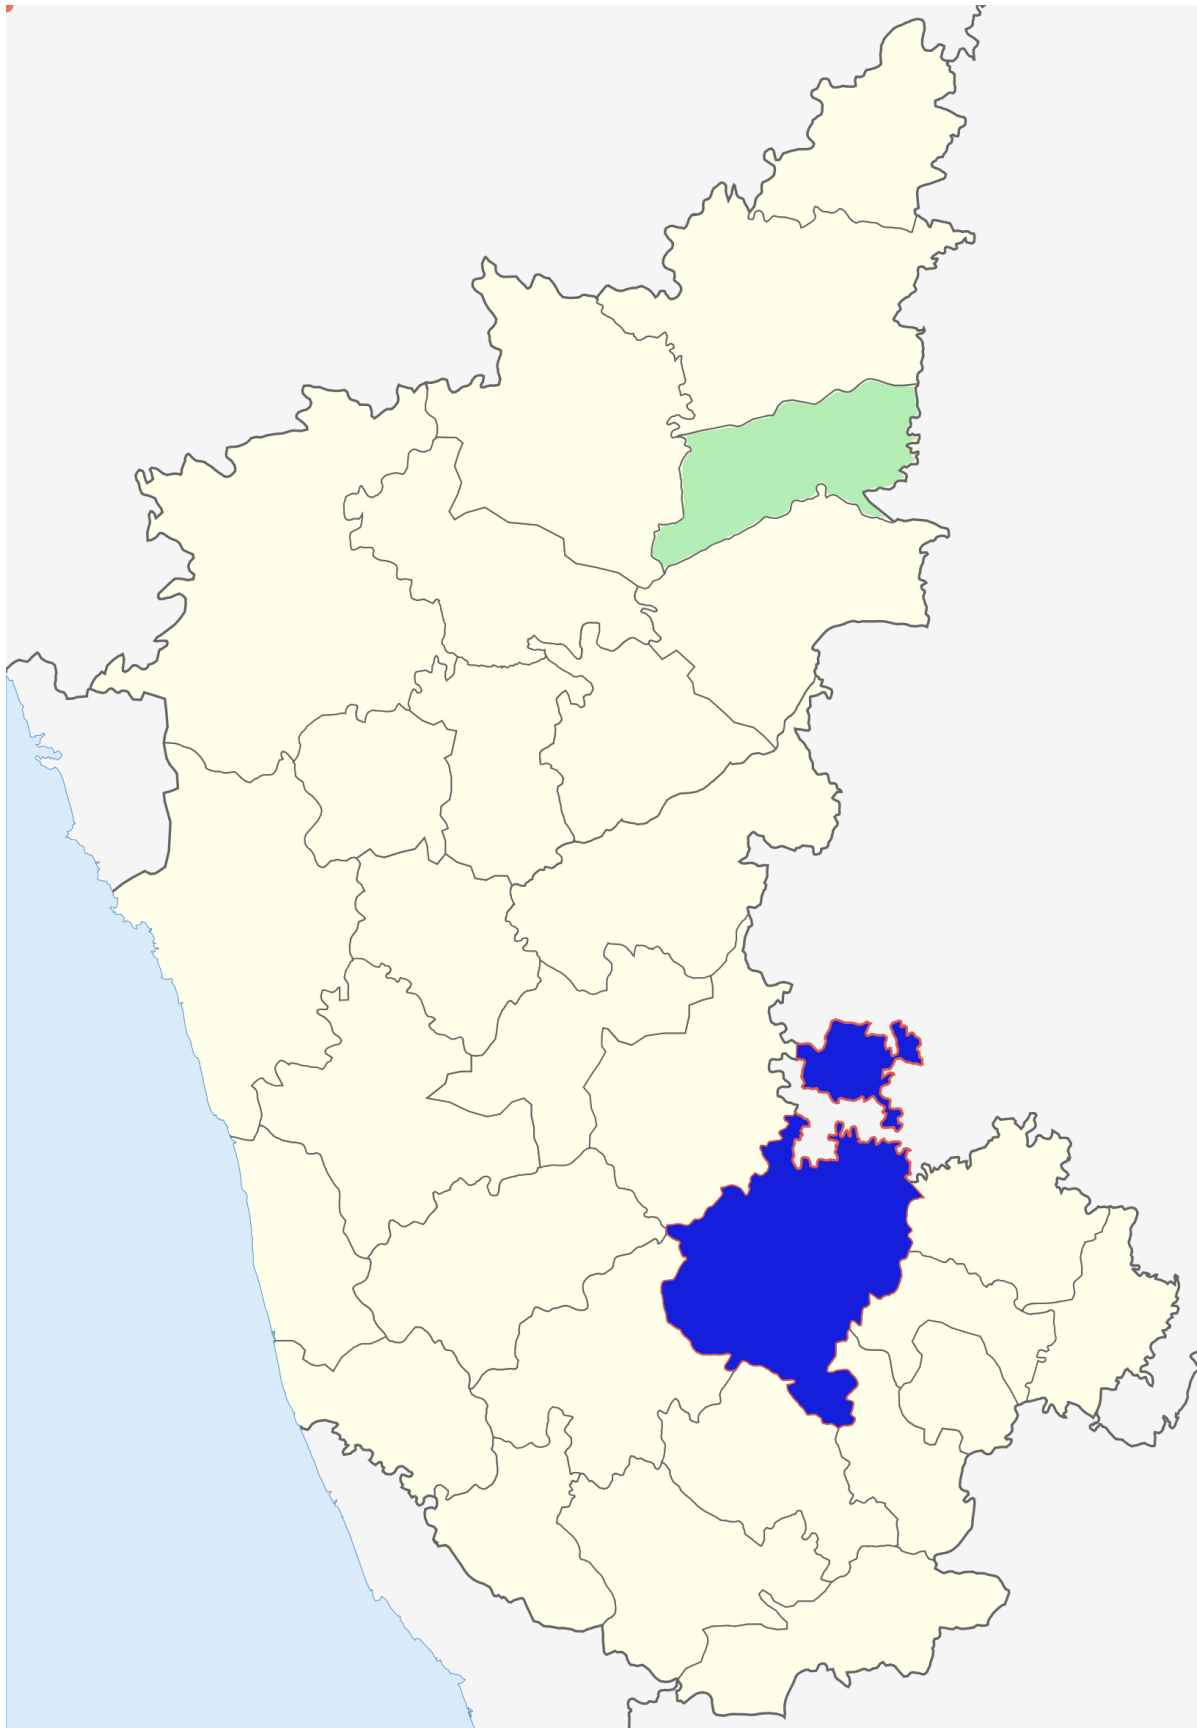

1  
2  
3  
4  
5  
6  
7  
8  
9  
10  
11  
12  
13  
14  
15  
16  
17  
18  
19  
20  
21  
22  
23  
24  
25  
26  
27  
28  
29  
30  
31  
32  
33  
34  
35  
36  
37  
38  
39  
40  
41  
42  
43  
44  
45  
46  
47  
48  
49  
50  
51  
52  
53  
54  
55  
56  
57  
58  
59  
60

### Structure of the intervention in Tumkur with key actors, relationships and timeline

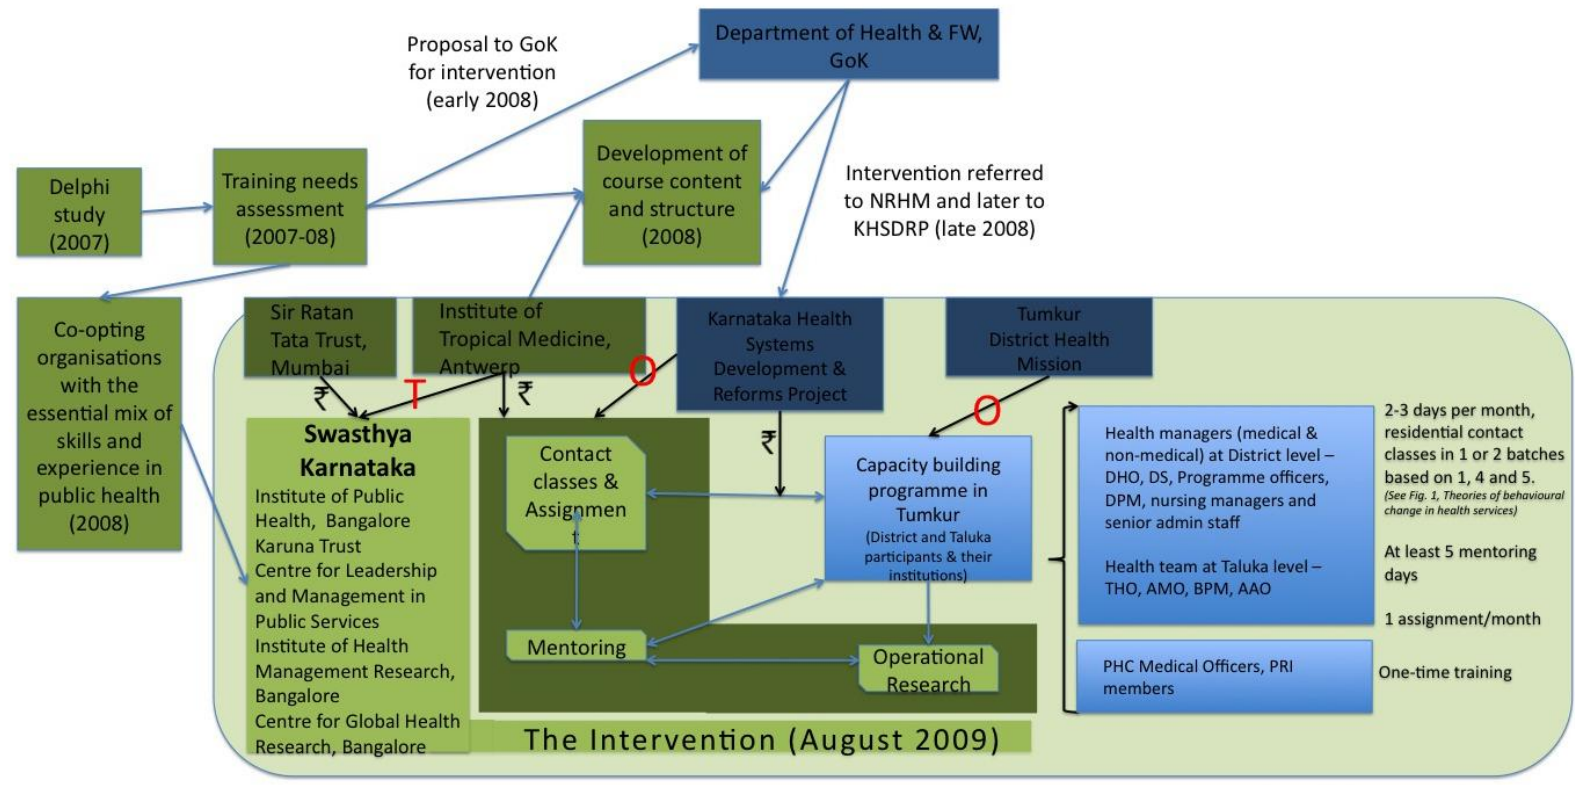

Institute of Public Health, Bangalore

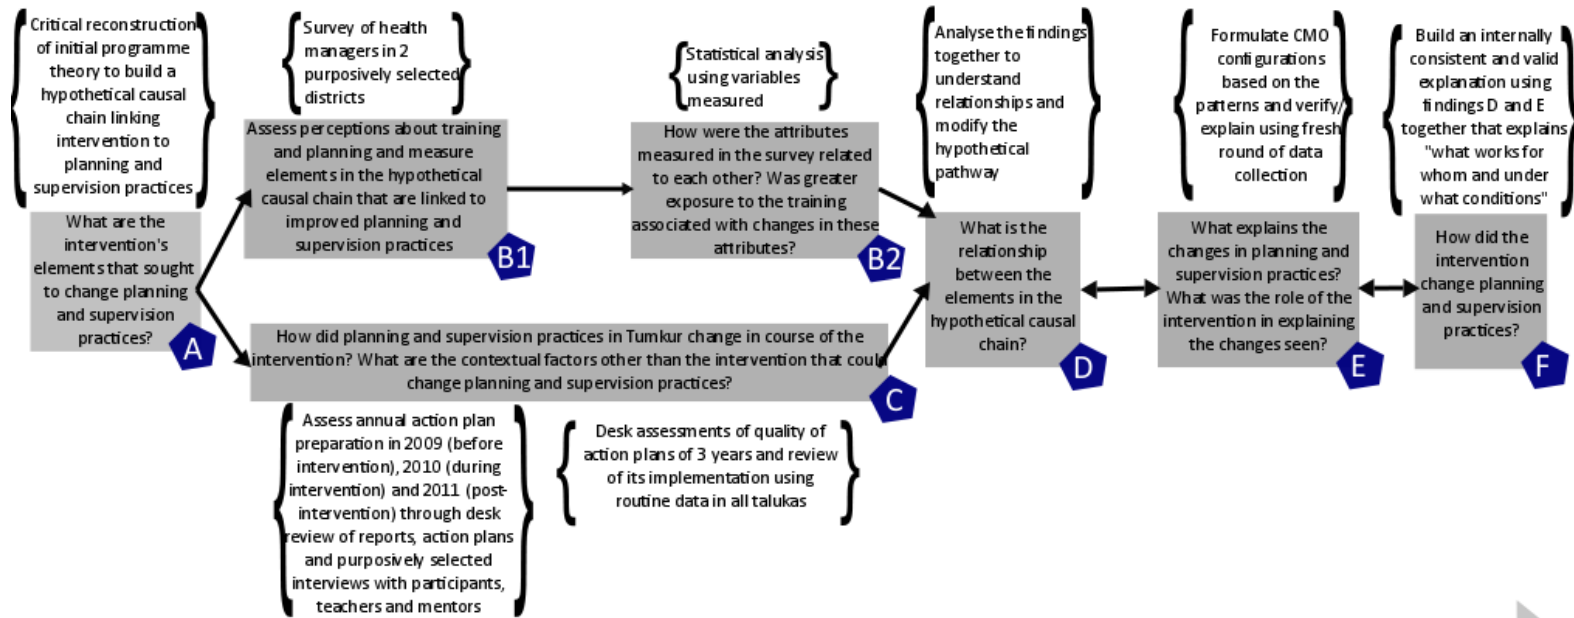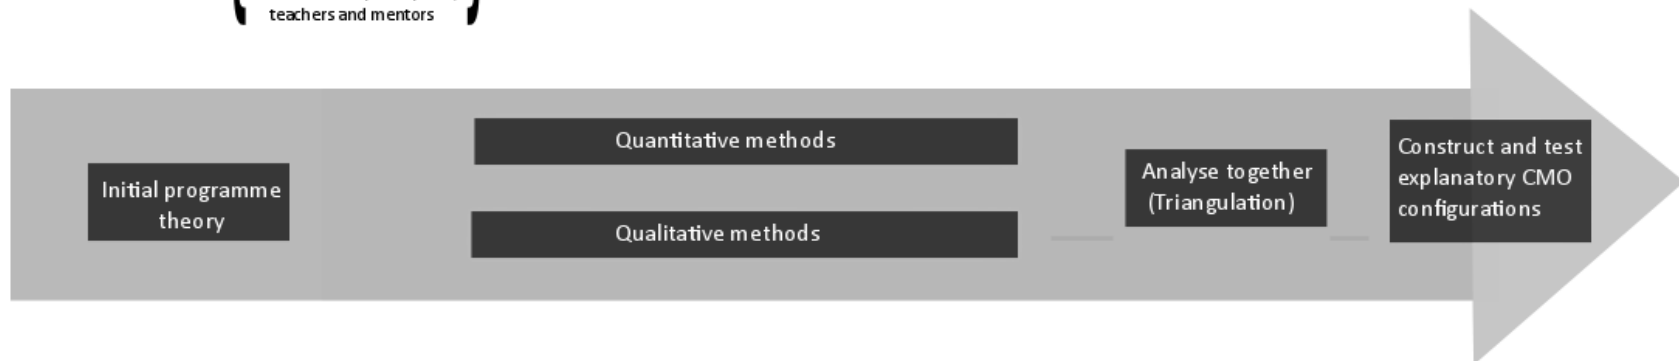

1  
2  
3  
4  
5  
6  
7  
8  
9  
10  
11  
12  
13  
14  
15  
16  
17  
18  
19  
20  
21  
22  
23  
24  
25  
26  
27  
28  
29  
30  
31  
32  
33  
34  
35  
36  
37  
38  
39  
40  
41  
42  
43  
44  
45  
46  
47  
48  
49  
50  
51  
52  
53  
54  
55  
56  
57  
58  
59  
60

## Step 1

Assessing the scope of the evaluation and the appropriateness of theory-driven evaluation

## Step 2

Critical reconstruction of the initial programme theory

## Step 3

Choice of data collection methods and development of tools

## Step 4

Assessing the initial action model: Evaluating relevance of programme design and degree of implementation

## Step 5

Assessing the initial causal model: Establishing the causal mechanisms and contextual factors, and their interactions

## Step 6

Translating findings into the refined programme theory



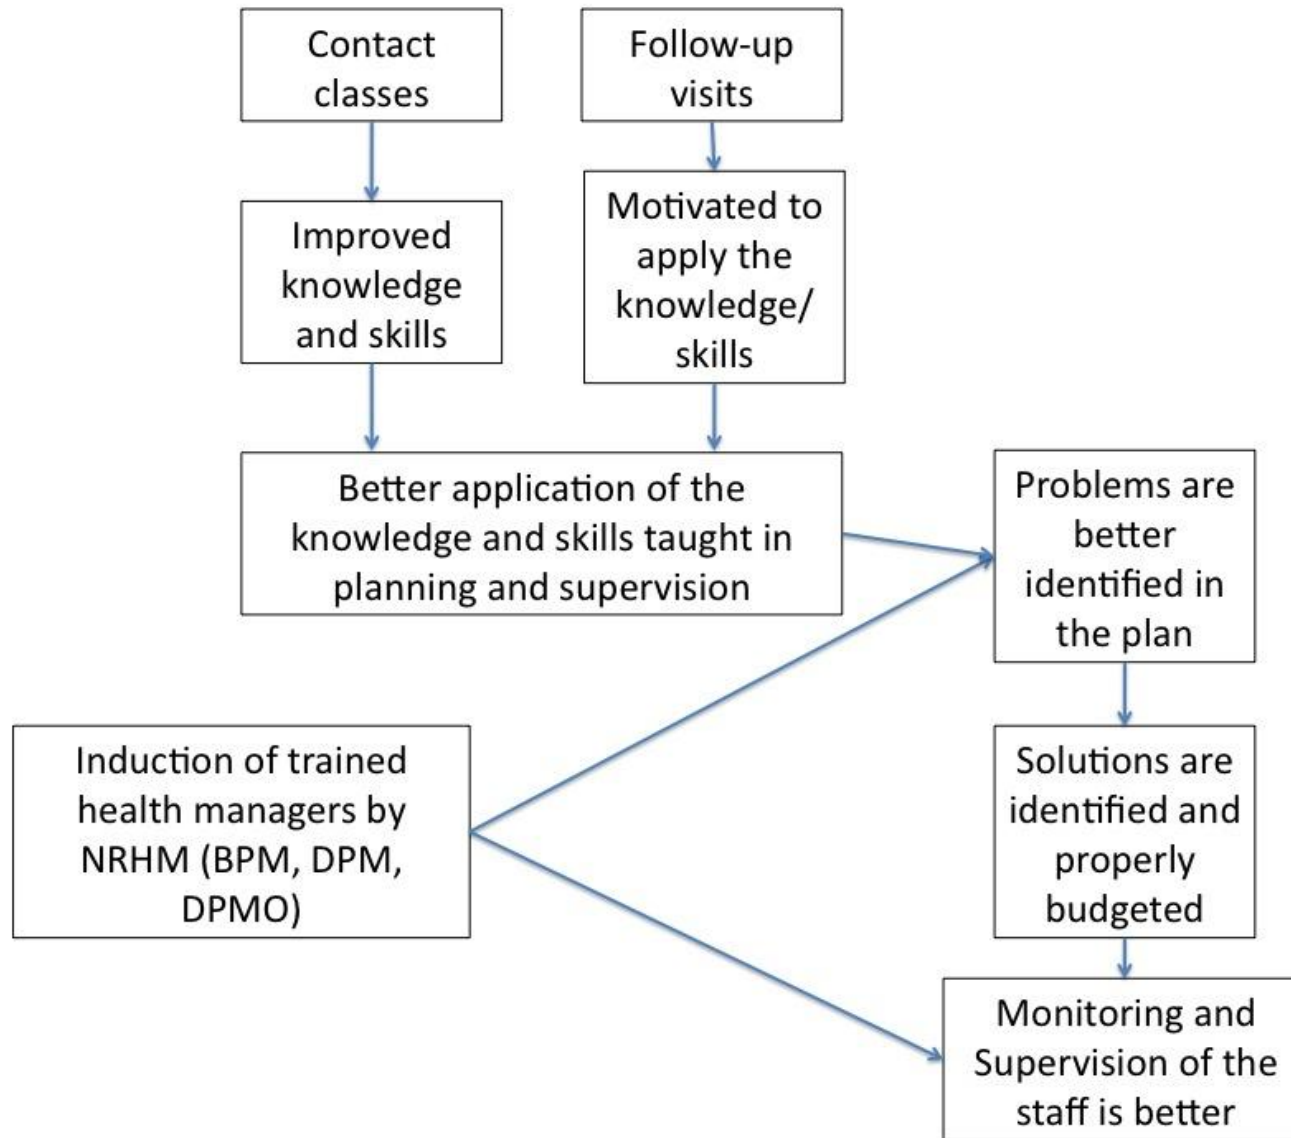

1  
2  
3  
4  
5  
6  
7  
8  
9  
10  
11  
12  
13  
14  
15  
16  
17  
18  
19  
20  
21  
22  
23  
24  
25  
26  
27  
28  
29  
30  
31  
32  
33  
34  
35  
36  
37  
38  
39  
40  
41  
42  
43  
44  
45  
46  
47  
48  
49

1  
2  
3  
4  
5  
6  
7  
8  
9  
10  
11  
12  
13  
14  
15  
16  
17  
18  
19  
20  
21  
22  
23  
24  
25  
26  
27  
28  
29  
30  
31  
32  
33  
34  
35  
36  
37  
38  
39  
40  
41  
42  
43  
44  
45  
46  
47  
48  
49

### Theories of behavioural change in health services

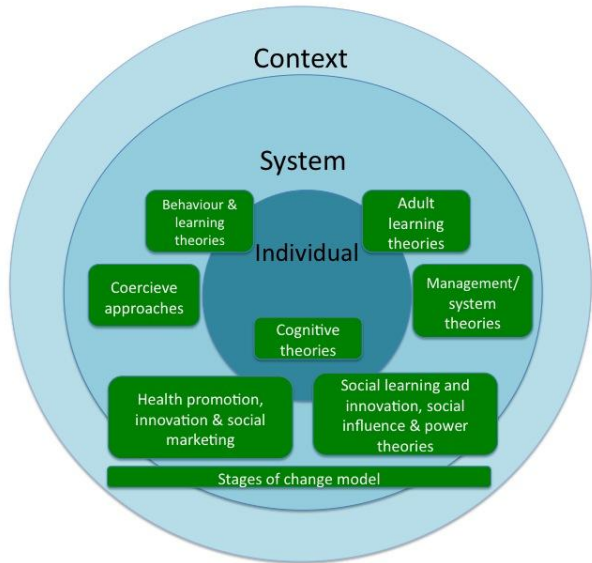

Theories in relation to sphere of influence Individual, System and context

| Theory                                                                       | Assumptions                                                                                                                                                                                        | Interventions based on theory                                                                                                                                                                                                                                                                                   |
|------------------------------------------------------------------------------|----------------------------------------------------------------------------------------------------------------------------------------------------------------------------------------------------|-----------------------------------------------------------------------------------------------------------------------------------------------------------------------------------------------------------------------------------------------------------------------------------------------------------------|
| Adult Learning theories                                                      | Change occurs when individuals have personal experience with a problem and helped develop the solution                                                                                             | Develop guidelines through local consensus, small-group interactive learning, problem-based learning                                                                                                                                                                                                            |
| Health promotion, innovation and social marketing theories                   | Behaviours can be changed with clear and attractive products and messages that meet a need of the target audience                                                                                  | Needs assessments, adapting change proposals to meet local needs, creating clear and attractive messages, and disseminating them via multiple channels                                                                                                                                                          |
| Behavioural and learning theories                                            | Behaviours are a result of external stimuli                                                                                                                                                        | Audit and feedback, reminders, modelling correct performance, incentives, sanctions, removing factors that are demoralising                                                                                                                                                                                     |
| Social learning and innovation theories, social influence and power theories | Change occurs through the interaction and influence of important people, and through development of new social norms                                                                               | Use opinion leaders or respected peers to disseminate guidelines, pressure from patients to use an innovation                                                                                                                                                                                                   |
| Management theories, system theories                                         | Errors can be prevented by improving the design of health systems and processes                                                                                                                    | Total quality management, total quality improvement approaches, changing structures and tasks                                                                                                                                                                                                                   |
| Coercive approaches                                                          | Change occurs because of pressure and control                                                                                                                                                      | Laws and regulations, licensing, budgeting, complaints procedures, and legal pursuits                                                                                                                                                                                                                           |
| Stages of change model, and the PRECEDE model                                | To change, individuals pass through stages (precontemplation, contemplation of change, preparation for change, action, and maintenance) and different interventions are needed at different stages | Predisposing strategies, to progress from precontemplation to contemplation (education activities, conferences); enabling strategies, to progress from contemplation to action (clinical guidelines); and reinforcing strategies, to progress from preparation to maintenance (audit and feedback, peer review) |

Adapted from Rowe *et al.* 2005. How can we achieve and maintain high-quality performance of health workers in low-resource settings? *The Lancet*. 366(9490): 1026-1035.

Institute of Public Health, Bangalore 2010
